# Supplementary material for: Quality indicators of clinical cancer care (QC3) in colorectal cancer
Source: PubMed Central journal article supplement — BMJ Open. 2013 Jul 19;3(7):e002818. doi: 10.1136/bmjopen-2013-002818 (PMC3717445; doi:10.1136/bmjopen-2013-002818), 2013-07-19
Supplement: bmjopen-2013-002818.draft_revisions.pdf [file bmjopen-2013-002818.draft_revisions.pdf]

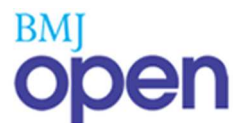

## Quality indicators of Clinical Cancer Care (QC<sub>3</sub>) in colorectal cancer

|                                 |                                                                                                                                                                                                                                                                                                                                                                                    |
|---------------------------------|------------------------------------------------------------------------------------------------------------------------------------------------------------------------------------------------------------------------------------------------------------------------------------------------------------------------------------------------------------------------------------|
| Journal:                        | <i>BMJ Open</i>                                                                                                                                                                                                                                                                                                                                                                    |
| Manuscript ID:                  | bmjopen-2013-002818                                                                                                                                                                                                                                                                                                                                                                |
| Article Type:                   | Research                                                                                                                                                                                                                                                                                                                                                                           |
| Date Submitted by the Author:   | 01-Mar-2013                                                                                                                                                                                                                                                                                                                                                                        |
| Complete List of Authors:       | Bianchi, Valentina; Cantonal Institute of Pathology, Ticino Cancer Registry Spitale, Alessandra; Cantonal Institute of Pathology, Ticino Cancer Registry Mazzucchelli, Luca; Cantonal Institute of Pathology, Clinical Pathology Ortelli, Laura; Cantonal Institute of Pathology, Ticino Cancer Registry Bordonni, Andrea; Cantonal Institute of Pathology, Ticino Cancer Registry |
| <b>Primary Subject Heading</b>: | Qualitative research                                                                                                                                                                                                                                                                                                                                                               |
| Secondary Subject Heading:      | Oncology                                                                                                                                                                                                                                                                                                                                                                           |
| Keywords:                       | QUALITATIVE RESEARCH, Quality in health care < HEALTH SERVICES ADMINISTRATION & MANAGEMENT, Gastrointestinal tumours < ONCOLOGY, Gastrointestinal tumours < GASTROENTEROLOGY                                                                                                                                                                                                       |
|                                 |                                                                                                                                                                                                                                                                                                                                                                                    |

SCHOLARONE™  
Manuscripts

1  
2  
3 **Original Article**  
4  
5  
6  
7

8 **Quality indicators of Clinical Cancer Care (QC<sub>3</sub>) in colorectal cancer**  
9

10  
11  
12 Valentina Bianchi<sup>1</sup>, Alessandra Spitale<sup>1</sup>, Luca Mazzucchelli<sup>2</sup>, Laura Ortelli<sup>1</sup>, Andrea Bordoni<sup>1</sup> and  
13 the QC<sub>3</sub> CRC Working Group<sup>3</sup>  
14  
15  
16

17  
18  
19 <sup>1</sup>Cantonal Institute of Pathology, Ticino Cancer Registry, 6600 Locarno, Switzerland  
20

21 <sup>2</sup>Cantonal Institute of Pathology, Clinical Pathology, 6600 Locarno, Switzerland  
22

23 <sup>3</sup>Members of the QC<sub>3</sub> Colorectal Working Group are listed in the Appendix  
24  
25  
26  
27

28 **Running title: Quality indicators of clinical care in colorectal cancer**  
29  
30  
31

32 **Corresponding author:**  
33

34 Valentina Bianchi, M.D., Cantonal Institute of Pathology, Ticino Cancer Registry, , Via in Selva  
35 24, 6600 Locarno, Switzerland - e-mail: [valentina.bianchi-galdi@ti.ch](mailto:valentina.bianchi-galdi@ti.ch); phone: +41 91 8160826;  
36  
37 fax: +41 91 8160829  
38  
39  
40  
41  
42

43 **Key words:** *quality of cancer care, colorectal cancer, quality indicators, cancer registry,*  
44 *population-based study*  
45  
46  
47  
48

49 **Word count: 2811**  
50  
51  
52  
53  
54  
55  
56  
57  
58  
59  
60

## ABSTRACT

**Objectives:** Assessing the quality of cancer care (QoCC) has become increasingly important to providers, regulators and purchasers of care worldwide. Aim of this study was to develop evidence-based quality indicators (QI) for colorectal cancer (CRC) to be applied in a population-based setting.

**Design:** A comprehensive evidence-based literature search was performed to identify the initial list of QI, which were then selected and developed using a two-step modified Delphi process involving two multidisciplinary expert panels with expertise in colorectal cancer care, quality of care and epidemiology.

**Setting:** The QC<sub>3</sub> population-based project, which involve all the public and private hospitals and clinics present on the territory of Canton Ticino (South Switzerland).

**Participants:** Ticino Cancer Registry, The Colorectal Cancer Working Group (CRC-WG) and the external academic Advisory Board (AB).

**Main outcome measures:** Set of quality indicators (QI) which encompass the whole diagnostic-treatment process of colorectal cancer.

**Results:** Of the 149 QI emerged from 181 sources of literature, 104 were selected during the in-person meeting of the CRC-WG. During the Delphi process, the CRC-WG shortened the list to 89 QI. The AB finally validated 27 QI according to the phase of care: diagnosis (N=6), pathology (N=3), treatment (N=16), and outcome (N=2).

**Conclusions:** Using the validated Delphi methodology, including literature review of the evidence and integration of expert opinions from local clinicians and international experts we were able to develop a list of QI to assess QoCC for CRC. This will hopefully guarantee feasibility of data retrieval, acceptance and translation of QI into the daily clinical practice to improve QoCC. Moreover, evidence-based selected QI allow to assess immediate changes and improvements in the diagnostic-therapeutic process that could be translated in a short-term benefit for patients with a possible gaining both in overall and disease-free survival.

## ARTICLE SUMMARY

### Article focus

- Quality of Cancer care (QoCC) studies on specific quality indicators (QI) developed worldwide since the late '90s showed both a continuous improvement of oncologic care provided by the clinical structures involved and an increased availability of specialized care in the considered areas.
- This study aims to define evidence-based QI for colorectal cancer care (CRC), in order to favour the evaluation of the oncologic diagnostic-therapeutic process, which can be followed by the definition of standards of care for each QI, in terms of minimum and target requirements.

### Key messages

- QI should be defined, developed and tested with scientific evidence-based rigor in a careful and transparent manner, taking into account their degree of relevancy, validity, reliability and feasibility.
- The selected CRC QI can be applied in a population-based setting, implying the inclusion of the elderly, considering age an extremely important determinant of treatment.

### Strengths and limitations of this study

- To develop the CRC QI we used a formal iterative process, the RAND/UCLA Appropriateness Methodology widely diffused and validated within other QoCC research. The selected QI are representative of the main steps of the diagnostic-therapeutic process.
- Due to the evidence that research studies demonstrated that single-discipline panels select different indicators than do multidisciplinary panels and to maximize the applicability of CRC QI, we constituted two panels of experts, a local Working Group and an external national/international academic Advisory Board, which could offer a multidisciplinary perspective on practice and who can guarantee that the selected QI and their results will be comparable with national and international data. .

- 1  
2  
3  
4  
5  
6  
7  
8  
9  
10  
11  
12  
13  
14  
15  
16  
17  
18  
19  
20  
21  
22  
23  
24  
25  
26  
27  
28  
29  
30  
31  
32  
33  
34  
35  
36  
37  
38  
39  
40  
41  
42  
43  
44  
45  
46  
47  
48  
49  
50  
51  
52  
53  
54  
55  
56  
57  
58  
59  
60
- The possible limitation of the current work is the level of evidence found in the literature. However this situation is common to many aspects of health care, and it was the reason that the expert panel methodology was developed – specifically, to identify the processes that are most likely to be valid measures of quality when the highest level of evidence is not available

## INTRODUCTION

Research on QoCC performed during the last decade has demonstrated that the increase in knowledge on treatments with proven efficacy do not directly translate into optimal delivery of such treatments to patients. Moreover, accumulating evidence suggests that underuse and overuse of care may occur for patients with cancer.[1-2] In addition to survival analysis, to evaluate and compare quality of care at the population-based level, the assessment of QoCC has become increasingly important to providers, regulators and purchasers of care to growing demand for services, rising costs, constrained resources and evidence of variation in clinical practice.[3]

QoCC studies and structured programmes on specific quality indicators (QI) have been developed worldwide since the late '90s, showing both a continuous improvement of oncologic care provided by the clinical structures involved and an increased availability of specialized care in the considered areas. Most of these studies have been implemented at the regional level on a territory with uniform legislative, health and geographical characteristics, increasing the likelihood of recruitment of involved clinicians.[1, 4-7]

So far, in Switzerland no population-based study on QoCC with a prospective design has been implemented. In addition to the yearly renewed international guidelines for each type of cancer, there is still the need to evaluate the real conditions of care in the community. Population-based Cancer Registry data are therefore essential to describe and reflect real world and routine care as well as to provide regular feedback to healthcare workers and decision makers about the management of a disease in the daily practice and those treatments that are routinely prescribed and/or effective in all patient groups.[8] Moreover, Cancer Registries represent an independent observatory, thus assuring a fair evaluation service, avoiding any conflicts of interest.

We, therefore, implemented the QC<sub>3</sub> project, focusing on QoCC about the diagnosis-treatment process in colon-rectum, prostate, uterus, ovary and lung cancers in the territory of Canton Ticino (South Switzerland).

1  
2  
3 Colorectal cancer (CRC) is an important health issue worldwide. It is the most common malignancy  
4  
5 in Europe (excluding non-melanoma skin cancers) and the second most common in terms of cancer-  
6  
7 related mortality.[9] In Switzerland, CRC is the second and third most frequent tumour in women  
8  
9 and men, respectively. About 4000 CRC cases are diagnosed annually, corresponding to a European  
10  
11 age-standardized incidence rate equal to 49.4 and 30.6 cases per 100'000 inhabitants in men and  
12  
13 women, respectively, and representing the 11% of all tumours.[10-12] CRC is the third leading  
14  
15 cancer cause of death in Switzerland, with approximately 1600 deaths/year, corresponding to a  
16  
17 European age-standardized mortality rate equal to 18.5 and 10.6 cases per 100'000 inhabitants in  
18  
19 men and women, respectively. With a 5-year survival probability equal to 60%, Switzerland is the  
20  
21 country with the most favourable prognosis in Europe.[13] A recent Swiss report with follow up to  
22  
23 2009 show an additional 5 year survival increase to 62%.[11]

24  
25  
26  
27 The aims of the QC<sub>3</sub> study are the following: 1) to define evidence-based QoCC indicators for the  
28  
29 tumour localizations above cited, in order to favour an improvement of the short-term oncologic  
30  
31 diagnostic-therapeutic process; 2) to define and implement at the regional level standards of care for  
32  
33 each QoCC measure, in terms of minimum and target requirements. In the present report we will  
34  
35 describe the initial part of the QC<sub>3</sub> project, meaning the process followed to identify the panel of  
36  
37 specific QoCC indicators for the CRC, as well as the list of QoCC indicators identified and  
38  
39 approved both by a dedicated Working Group of local health care providers and by an external  
40  
41 independent academic Advisory Board.  
42  
43  
44  
45  
46  
47  
48  
49  
50  
51  
52  
53  
54  
55  
56  
57  
58  
59  
60

## MATERIAL AND METHODS

The QC<sub>3</sub> project is a prospective, descriptive study on the QoCC to be implemented in a population-based setting; it is performed by the Ticino Cancer Registry on a 3-year time period (2011-2013) on the territory of Canton Ticino (South Switzerland). In this paper we focus on the initial part of the project: the identification of the CRC quality indicators which will be used to evaluate the QoCC about CRC in our region.

Quality indicators (QI) for CRC were developed involving a local expert panel, named QC<sub>3</sub> Colorectal Working Group (CRC-WG). Elected members, selected on the basis of their expertise and on their daily clinical involvement in CRC care, were contacted to have their interest confirmed in being involved. The final QC<sub>3</sub> CRC-WG encompassed two pathologists, four gastroenterologists, two oncologists, three surgeons, two radiologists, two radiation oncologists and one nuclear medicine specialist, for a total of 15 panellists all working in the public or in the private hospitals and clinics of Canton Ticino (see Appendix 1).

Published studies and references were identified through a comprehensive search on PubMed/MEDLINE. For each of the identified candidate indicators, we performed a systematic literature review to identify the highest level of evidence supporting the validity of that quality indicator for articles published from 1990 onwards. The reference list of the included articles were also examined to identify any additional article that had not been identified in the MEDLINE search. We included all the peer-reviewed articles, but case reports, letters, abstracts or editorials. If evidence at the highest level were limited or absent, then lower levels of evidence were evaluated. For example, if data were not available from randomized controlled trials, cohort or case-control studies, case series and expert opinion or clinical guidelines were reviewed.

The initial QI list emerged from 181 sources of literature, and it was proposed to the CRC-WG in the context of an in-person meeting held at the very beginning of the process. The list was then left to the QC<sub>3</sub> CRC-WG's evaluation for a period of two weeks. The participants were asked to provide a whole opinion with written comments about those QI considered pertinent for the assessment of



1  
2  
3 CRC care quality, to suggest additional QI not already included in the list and to delete those QI  
4  
5 considered not suitable. In order to make the selection and evaluation easier, the QI were  
6  
7 subdivided in chapters recalling the Donabedian's and the National Initiative for Cancer Care  
8  
9 Quality schemes: diagnosis and staging, pathology, treatment, follow-up, outcome.[2, 14]  
10  
11

### 12 13 14 **Delphi Round 1**

15  
16 The QI selection was done by using a 2-step modified Delphi process.[15] The initial list of QI, re-  
17  
18 analyzed by the QC<sub>3</sub> CRC-WG, was formatted as a questionnaire, where for each indicator was  
19  
20 specified the numerator, the denominator and the sources of evidence from which it was extracted.  
21  
22 The questionnaire was distributed by regular mail to the QC<sub>3</sub> CRC-WG, so to maintain it  
23  
24 anonymous, along with a stamped, addressed return envelope and an attached letter with the  
25  
26 deadline date of two weeks from the receipt and the instruction for voting. Respondents were asked  
27  
28 to rate each QI adopting the RAND Appropriateness Methodology (scale 1 to 9, 1 = extremely  
29  
30 inappropriate; 9 = extremely appropriate), according to selection criteria of relevance, scientific  
31  
32 soundness (validity, reliability, comparability) and feasibility (precise definition and specification,  
33  
34 data feasibility, reliability of data collection).[16-18] Each QI was judged as validated if it reached a  
35  
36 strong consensus for acceptance ( $\geq 70\%$  of the QC<sub>3</sub> CRC-WG rated the QI with a vote  $\geq 7$ ),  
37  
38 discarded if it reached a strong consensus for exclusion ( $\geq 70\%$  of the QC<sub>3</sub> CRC-WG rated the QI  
39  
40 with a votes  $\leq 3$ ) and in stand-by if there was an unclear consensus ( $4 \leq \text{votes} \leq 6$ ), which implies  
41  
42 an eventual in-person meeting.  
43  
44  
45  
46  
47  
48

### 49 **Delphi Round 2**

50  
51 The Delphi Round 2 questionnaire was performed with the same modalities of the first round and  
52  
53 enclosed the frequency distribution of round 1 votes, allowing the panellists to eventually alter their  
54  
55 responses, in the light of colleagues' assessments.[16]  
56  
57  
58  
59  
60

### Advisory Board Review

The list of selected QI derived from the two Delphi rounds was then submitted to an independent external national/international academic multidisciplinary Advisory Board (AB), in order to get an additional evaluation on the suitability of QI as “quality” indexes according to the criteria shown in the previous paragraph. The intent was to achieve at least one health professional for each specialty. The AB included one pathologist, one gastroenterologist, two oncologists, two surgeons, one radiologist, one radiation oncologist, one nuclear medicine specialist and one epidemiologist, for a total of 10 experts in CRC care (see Acknowledgements); all the panellists are daily involved in the CRC care and they had been contacted with the same modalities of the QC<sub>3</sub> CRC WG. The selected QI as well as the corresponding literature sources were distributed to the AB as an electronic form where their opinion about QI were expressed both as megatrends (i.e. response yes/no to the suitability of each QI) and as eventual additional comments. We considered every single QI as finally approved by the AB if it achieved  $\geq 70\%$  of the agreement (i.e.  $\geq 70\%$  of respondents should have answered “yes”) and if no doubtful comments about the QI had been expressed.

## RESULTS

The QI selection process began in January 2011 and ended in December 2011.

Participation of CRC-WG members throughout the process was high: 15 (100%) participated to the in-person meeting, 12 (80%) completed both the Delphi round 1 and 2. The Delphi Round 1 questionnaire respondent time were in the range of 18 to 60 days, while for the Round 2, the delay time was in the range of 8 to 55 days; these delays and the time for recruitment of the AB influence the long time spent for this part of the project.

The Figure 1 summarizes the entire process used to select QI for CRC care. The literature search produces 181 citations dealing with CRC QoCC. From this search, we initially selected a total of 149 QI, which were proposed to the CRC-WG in the context of the initial in-person meeting. The following discussion and revision reduced the list to 104 QI before the modified Delphi process started; these QI were divided into the following areas: diagnosis and staging, pathology, treatment, follow-up and outcome. After the whole Delphi process the list was shortened to 89 QI, distributed as following: diagnosis and staging (N=16), pathology (N=20), treatment (N=38), follow-up (N=10), and outcome (N=5). The QI finally underwent to the AB's evaluation; this last step, according to the procedure described in the Methods, shortened the final list to 27 QI (Tab.1): diagnosis (N=6), pathology (N=3); treatment (N=16), follow-up (N=0), and outcome (N=2).

## DISCUSSION

In the preliminary phase of the QC<sub>3</sub> project shown in this paper we developed a panel of evidence-based CRC QI which are suitable to be implemented in a population-based setting.

To develop the QC<sub>3</sub> QI we used a formal iterative process, the RAND/UCLA Appropriateness Methodology widely diffused and validated within other QoCC research.[16-17] Due to the evidence that research studies demonstrated that single-discipline panels select different indicators than do multidisciplinary panels and to maximize the applicability of QC<sub>3</sub> CRC QI, we constituted a working group which could offer a multidisciplinary perspective on practice, including specialists, professionals, clinicians and researchers coming from both public and private hospitals.[19-25] Moreover, we have used a further validation step enrolling an independent national/international academic AB. This choice was due to the aim of measuring QoCC within a Swiss region, and of obtaining results which will be comparable with national and international data. We believe that the expertise and multidisciplinary representativeness of the QC<sub>3</sub> CRC-WG and of the AB will surely increase quality, acceptance and translation of QI into the daily clinical practice.

The selected QI are representative of the main steps of the diagnostic-therapeutic process. The diagnosis QI reflect the importance of a pre-operative evaluation and staging, reliable evaluation of the tumour localization and local invasion, and particularly for the rectal cancers, of a feasible and effective surgery. The pathology QI reflect the importance of a good communication between clinicians and pathologists in terms of patient's anamnesis and consequent evaluation of the effectiveness of a neo-adjuvant therapy; moreover, there is a need of standardization of the pathologic report following the international guidelines (e.g. take at least three samples of tumour during the macroscopy), not leaving any items unexplained or implicit. The treatment QI cover the general issues of surgery such as emergency, postoperative mortality and a multidisciplinary discussion of the clinical case; furthermore, they focus on the debate of the retrieved lymph nodes, on the timing between radiotherapy and surgery, on the adjuvant chemotherapy and on the attitude towards the metastatic patients. The two main items of the outcome chapter refers to the overall and

1  
2  
3 disease free survival. Concerning the QI about follow-up, AB did not finally include any of them.  
4  
5 Indeed, although the follow-up procedures are suggested by several international guidelines, they  
6  
7 are based on level II-III evidence and controversies remain regarding selection of optimal strategies  
8  
9 for following up patients after potentially curative colorectal cancer surgery. [26-29]  
10

11  
12 The first limitation of the current work is the level of evidence found in the literature. For some  
13  
14 indicators, strong evidence of their validity was not available from RCTs. However this situation is  
15  
16 common to many aspects of health care, and it was the very reason that the expert panel  
17  
18 methodology was developed – specifically, to identify the processes that are most likely to be valid  
19  
20 measures of quality when the highest level of evidence is not available.[16, 30-31] Secondly, we  
21  
22 may have missed some studies during the literature search and, consequently, some QI has not been  
23  
24 proposed to the QC<sub>3</sub> CRC-WG since the beginning of the QI revision process. However, this  
25  
26 limitation should have been overcome by the fact that the members of the QC<sub>3</sub> CRC-WG were  
27  
28 likely to be very familiar with the literature, and had the opportunity to suggest other QI based on  
29  
30 their experience.[7, 19-20, 32] Thus we integrated the best research evidence with clinical expertise,  
31  
32 as reported by Sackett et al.[33] A further limit could be the feasibility of measuring QI in terms of  
33  
34 data collection and calculation, which is immediately the next step. Actually, the QI selected by  
35  
36 both the QC<sub>3</sub> CRC-WG and the AB represent an ideal set of criteria to measure the quality of CRC  
37  
38 care; at the same time they both were concerned about the feasibility, validity and reliability of  
39  
40 clinical data collection, necessary for the calculation of each single QI. This is the reason why most  
41  
42 of the identified QC<sub>3</sub> QI are common to many QoCC studies. In addition, we performed a  
43  
44 retrospective preliminary pilot collection on the detailed and necessary incidence data of CRC  
45  
46 occurred in 2011, realising that the measurement of most QI is feasible, whereas for some selected  
47  
48 QI the retrieving of variables should be additionally tested.[34-35] Only the definitive results will  
49  
50 give us the proportion of missing information, whose magnitude will be assessed.  
51  
52  
53  
54

55  
56 The selected QC<sub>3</sub> CRC QI will be applied in a population-based setting, where age is an extremely  
57  
58 important determinant of treatment. The elderly are rarely included in the randomized clinical trials  
59  
60

1  
2  
3 with the consequence of a possible “underuse of treatment”. [18, 36-37] At a broad European level,  
4  
5 national audit registries in surgical oncology have led to improvements with a great impact and they  
6  
7 offered the possibility, as for our project, to perform research on patients that are usually excluded  
8  
9 from clinical trials such as elderly and co-morbid patients. [38-39] Evidence suggests that the  
10  
11 relative benefits of treatment for the elderly are similar to those seen for cancer patients in general,  
12  
13 though decision making for treatment becomes more complex as life expectancy, co-existing  
14  
15 illnesses, and functional status all need to be considered. [18, 36-37] Applying these QI and if all  
16  
17 these items will be satisfied we can affirm to have a real good quality process of CRC care for the  
18  
19 whole population. The foreseeable future in quality evaluation and improvement for health care will  
20  
21 likely involve more and more frequently the use of QI by regulatory and accrediting agencies,  
22  
23 stakeholders, clinicians, individual hospitals and health care providers, as well as patients. This  
24  
25 underlines that the QI should be defined, developed and tested with scientific evidence-based rigor  
26  
27 in a careful and transparent manner, taking into account their degree of relevancy, validity,  
28  
29 reliability and feasibility. [22, 24] Although QI have been defined in several different ways, all  
30  
31 authors agreed that the final aim is the improvement of patients outcome. [23, 25, 40]  
32  
33  
34  
35

36 The systematic trend analysis of QI allows to assess immediate changes and improvements in the  
37  
38 diagnostic-therapeutic process that could be translated in a short-term benefit for patient, without  
39  
40 waiting for survival analysis typically needed some years to be produced because of the patients’  
41  
42 follow-up. Furthermore, this system of evaluation and auto-evaluation could favour the surveillance  
43  
44 and monitoring of the comprehensive level of the oncologic care in the region, the clinical  
45  
46 performance homogeneity, the possible weakness of the clinical network, and finally the corrective  
47  
48 interventions to be adopted to improve the QoCC.  
49  
50

51 With this study, we hope to increase the awareness of the value of QI in health care so to encourage  
52  
53 more uniform practices and improve provider documentation of medical care in our region;  
54  
55 moreover, we hope that standardization of QI among different regions will help to define threshold  
56  
57 of minimal standard of care.  
58  
59  
60

## REFERENCE LIST

1. Malin JL, Schneider EC, Epstein AM, et al. Results of the National Initiative for Cancer Care Quality: how can we improve the quality of cancer care in the United States? *J Clin Oncol* 2006;**24**(4):626-34  
doi: JCO.2005.03.3365 [pii]10.1200/JCO.2005.03.3365[published Online First: Epub Date]].
2. Schneider EC, Malin JL, Kahn KL, et al. Developing a system to assess the quality of cancer care: ASCO's national initiative on cancer care quality. *J Clin Oncol* 2004;**22**(15):2985-91  
doi: 10.1200/JCO.2004.09.08722/15/2985 [pii][published Online First: Epub Date]].
3. Campbell SM, Roland MO, Buetow SA. Defining quality of care. *Soc Sci Med* 2000;**51**(11):1611-25  
doi: S0277953600000575 [pii][published Online First: Epub Date]].
4. Neuss MN, Desch CE, McNiff KK, et al. A process for measuring the quality of cancer care: the Quality Oncology Practice Initiative. *J Clin Oncol* 2005;**23**(25):6233-9  
doi:JCO.2005.05.948 [pii]10.1200/JCO.2005.05.948[published Online First: Epub Date]].
5. Duvalko KM, Sherar M, Sawka C. Creating a system for performance improvement in cancer care: Cancer Care Ontario's clinical governance framework. *Cancer Control* 2009;**16**(4):293-302
6. Mainz J, Hansen AM, Palshof T, et al. National quality measurement using clinical indicators: the Danish National Indicator Project. *J Surg Oncol* 2009;**99**(8):500-4  
doi:10.1002/jso.21192[published Online First: Epub Date]].
7. Gagliardi AR, Simunovic M, Langer B, et al. Development of quality indicators for colorectal cancer surgery, using a 3-step modified Delphi approach. *Can J Surg* 2005;**48**(6):441-52
8. Peppercorn JM, Weeks JC, Cook EF, et al. Comparison of outcomes in cancer patients treated within and outside clinical trials: conceptual framework and structured review. *Lancet* 2004;**363**(9405):263-70  
doi: S0140-6736(03)15383-4 [pii]10.1016/S0140-6736(03)15383-4[published Online First: Epub Date]].
9. Ferlay J, Shin HR, Bray F, et al. GLOBOCAN 2008, Cancer Incidence and Mortality Worldwide: IARC CancerBase No. 10 [Internet]. 2010.
10. NICER. Secondary 2012. <http://www.nicer.org>.
11. Bordoni A, Lorez M, Bouchardy C, et al. Trends in colorectal cancer survival in Switzerland. *Bulletin Suisse du Cancer* 2012;**1/2012**:51-54
12. Bouchardy C, Lutz JM, Kühni C, et al. *I tumori in Svizzera. Situazione e sviluppi dal 1983 al 2007*. Neuchâtel: Ufficio Federale di Statistica (UFS), 2011.
13. Sant M, Allemani C, Santaquilani M, et al. EURO CARE-4. Survival of cancer patients diagnosed in 1995-1999. Results and commentary. *Eur J Cancer* 2009;**45**(6):931-91  
doi: S0959-8049(08)00926-X [pii]10.1016/j.ejca.2008.11.018[published Online First: Epub Date]].
14. Donabedian A. Evaluating the quality of medical care. *Milbank Q* 1966;**83**:691-729
15. Fink A, Kosecoff J, Chassin M, et al. Consensus methods: characteristics and guidelines for use. *Am J Public Health* 1984;**74**(9):979-83
16. Jones J, Hunter D. Consensus methods for medical and health services research. *BMJ* 1995;**311**(7001):376-80
17. Brook RH. The Rand/UCLA appropriateness method. In: McCormic KA, Moore SR, Siegel RA, eds. *Clinical practice guideline development: methodology perspectives*. Rockville, Md: Agency for Health Care Policy and Research, 1994:59-70.
18. Krzyzanowska MK, Barbera L, Elit L, et al. Identifying population-level indicators to measure the quality of cancer care for women. *Int J Qual Health Care* 2011;**23**(5):554-64  
doi: mzm043 [pii]10.1093/intqhc/mzm043[published Online First: Epub Date]].



19. Leape LL, Park RE, Kahan JP, et al. Group judgments of appropriateness: the effect of panel composition. *Qual Assur Health Care* 1992;**4**(2):151-9
20. Campbell SM, Hann M, Roland MO, et al. The effect of panel membership and feedback on ratings in a two-round Delphi survey: results of a randomized controlled trial. *Med Care* 1999;**37**(9):964-8
21. Coulter I, Adams A, Shekelle P. Impact of varying panel membership on ratings of appropriateness in consensus panels: a comparison of a multi- and single disciplinary panel. *Health Serv Res* 1995;**30**(4):577-91
22. Wollersheim H, Hermens R, Hulscher M, et al. Clinical indicators: development and applications. *Neth J Med* 2007;**65**(1):15-22
23. Mainz J. Defining and classifying clinical indicators for quality improvement. *Int J Qual Health Care* 2003;**15**(6):523-30
24. Mainz J. Developing evidence-based clinical indicators: a state of the art methods primer. *Int J Qual Health Care* 2003;**15 Suppl 1**:i5-11
25. Rubin HR, Pronovost P, Diette GB. From a process of care to a measure: the development and testing of a quality indicator. *Int J Qual Health Care* 2001;**13**(6):489-96
26. Labianca R, Nordlinger B, Beretta GD, et al. Primary colon cancer: ESMO Clinical Practice Guidelines for diagnosis, adjuvant treatment and follow-up. *Ann Oncol* 2010;**21**(suppl. 5):v70-v77
27. NCCN. Colon Cancer. 2.2011 ed: NCCN, 2011.
28. Pfister DG, Benson AB, 3rd, Somerfield MR. Clinical practice. Surveillance strategies after curative treatment of colorectal cancer. *N Engl J Med* 2004;**350**(23):2375-82  
doi: 10.1056/NEJMcp010529350/23/2375 [pii][published Online First: Epub Date].
29. Li Destri G, Di Cataldo A, Puleo S. Colorectal cancer follow-up: useful or useless? *Surg Oncol* 2006;**15**(1):1-12  
doi: S0960-7404(06)00025-9 [pii]10.1016/j.suronc.2006.06.001 [published Online First: Epub Date].
30. Campbell SM, Braspenning J, Hutchinson A, et al. Research methods used in developing and applying quality indicators in primary care. *Qual Saf Health Care* 2002;**11**(4):358-64
31. McGory ML, Shekelle PG, Ko CY. Development of quality indicators for patients undergoing colorectal cancer surgery. *J Natl Cancer Inst* 2006;**98**(22):1623-33  
doi: 98/22/1623 [pii]10.1093/jnci/djj438 [published Online First: Epub Date].
32. Ayanian JZ, Landrum MB, Normand SL, et al. Rating the appropriateness of coronary angiography--do practicing physicians agree with an expert panel and with each other? *N Engl J Med* 1998;**338**(26):1896-904  
doi: 10.1056/NEJM199806253382608 [published Online First: Epub Date].
33. Sackett DL, Starus SE, Richardson WS, et al. *Evidence-Based Medicine: How to Practice and Teach*. 2nd ed. London: Churchill Livingstone, 2000.
34. Qualità delle cure contro il cancro (QC3) nel territorio della Svizzera Italiana. Risultatai preliminari dei tumori coloretali incidenti nel 2011. XXXVII GRELL Annual Meeting; May 16-18, 2012 16-18 May 2012; Porto, Portugal.
35. QoCC Study: indicators of quality of cancer care in Southern Switzerland. 33rd IACR Annual Meeting; October 11-13, 2011; Balaclava, Mauritius.
36. Bouchardy C, Rapiti E, Blagojevic S, et al. Older female cancer patients: importance, causes, and consequences of undertreatment. *J Clin Oncol* 2007;**25**(14):1858-69  
doi: 25/14/1858 [pii]10.1200/JCO.2006.10.4208 [published Online First: Epub Date].
37. Bouchardy C, Rapiti E, Fioretta G, et al. Undertreatment strongly decreases prognosis of breast cancer in elderly women. *J Clin Oncol* 2003;**21**(19):3580-7  
doi: 10.1200/JCO.2003.02.046 JCO.2003.02.046 [pii][published Online First: Epub Date].



- 1  
2  
3 38. van Gijn W, van de Velde CJ. 2010 SSO John Wayne clinical research lecture: rectal cancer  
4 outcome improvements in Europe: population-based outcome registrations will conquer the  
5 world. *Ann Surg Oncol* 2011;**18**(3):691-6  
6 doi: 10.1245/s10434-010-1326-3[published Online First: Epub Date]].
- 7 39. van Gijn W, van de Velde CJ. Improving quality of cancer care through surgical audit. *Eur J*  
8 *Surg Oncol* 2010;**36 Suppl 1**:S23-6 doi: S0748-7983(10)00202-7  
9 [pii]10.1016/j.ejso.2010.06.026[published Online First: Epub Date]].
- 10 40. Characteristics of clinical indicators. *QRB Qual Rev Bull* 1989;**15**(11):330-9
- 11 41. Wilkins T, Reynolds PL. Colorectal cancer: a summary of the evidence for screening and  
12 prevention. *Am Fam Physician* 2008;**78**(12):1385-92
- 13 42. Sikka V, Ornato JP. Cancer diagnosis and outcomes in Michigan EDs vs other settings. *Am J*  
14 *Emerg Med* 2011  
15 doi: S0735-6757(10)00574-7 [pii]10.1016/j.ajem.2010.11.029[published Online First: Epub  
16 Date]].
- 17 43. Levin B, Lieberman DA, McFarland B, et al. Screening and surveillance for the early detection  
18 of colorectal cancer and adenomatous polyps, 2008: a joint guideline from the American  
19 Cancer Society, the US Multi-Society Task Force on Colorectal Cancer, and the American  
20 College of Radiology. *Gastroenterology* 2008;**134**(5):1570-95  
21 doi: S0016-5085(08)00232-1 [pii]10.1053/j.gastro.2008.02.002[published Online First:  
22 Epub Date]].
- 23 44. Winawer S, Fletcher R, Rex D, et al. Colorectal cancer screening and surveillance: clinical  
24 guidelines and rationale-Update based on new evidence. *Gastroenterology* 2003;**124**(2):544-  
25 60  
26 doi: 10.1053/gast.2003.50044S0016508502158951 [pii][published Online First: Epub  
27 Date]].
- 28 45. Majumdar SR, Fletcher RH, Evans AT. How does colorectal cancer present? Symptoms,  
29 duration, and clues to location. *Am J Gastroenterol* 1999;**94**(10):3039-45  
30 doi: S0002927099005109 [pii]10.1111/j.1572-0241.1999.01454.x[published Online First:  
31 Epub Date]].
- 32 46. QOPI. Summary of the measures. Spring 2011. Secondary Summary of the measures. Spring  
33 2011. 2011. <http://qopi.asco.org/Methodology>.
- 34 47. Smith N, Brown G. Preoperative staging of rectal cancer. *Acta Oncol* 2008;**47**(1):20-31  
35 doi: 783360368 [pii]10.1080/02841860701697720[published Online First: Epub Date]].
- 36 48. Schneider PM, Vallbohmer D, Ploenes Y, et al. Evaluation of quality indicators following  
37 implementation of total mesorectal excision in primarily resected rectal cancer changed  
38 future management. *Int J Colorectal Dis* 2011;**26**(7):903-9  
39 doi: 10.1007/s00384-011-1155-2[published Online First: Epub Date]].
- 40 49. ACR. Practice Guidelines and Technical Standards. Secondary Practice Guidelines and  
41 Technical Standards 2011. <http://www.acr.org/guidelines>.
- 42 50. Taylor FG, Quirke P, Heald RJ, et al. Preoperative High-resolution Magnetic Resonance  
43 Imaging Can Identify Good Prognosis Stage I, II, and III Rectal Cancer Best Managed by  
44 Surgery Alone: A Prospective, Multicenter, European Study That Recruited Consecutive  
45 Patients With Rectal Cancer. *Ann Surg* 2011  
46 doi: 10.1097/SLA.0b013e31820b8d52[published Online First: Epub Date]].
- 47 51. Beets-Tan RG, Beets GL. Local staging of rectal cancer: A review of imaging. *J Magn Reson*  
48 *Imaging* 2011;**33**(5):1012-9  
49 doi: 10.1002/jmri.22475[published Online First: Epub Date]].
- 50 52. Bellows CF, Jaffe B, Bacigalupo L, et al. Clinical significance of magnetic resonance imaging  
51 findings in rectal cancer. *World J Radiol* 2011;**3**(4):92-104  
52 doi: 10.4329/wjr.v3.i4.92[published Online First: Epub Date]].
- 53  
54  
55  
56  
57  
58  
59  
60

- 1  
2  
3 53. Taylor FG, Quirke P, Heald RJ, et al. One millimetre is the safe cut-off for magnetic resonance  
4 imaging prediction of surgical margin status in rectal cancer. *Br J Surg* 2011;**98**(6):872-79  
5 doi: 10.1002/bjs.7458[published Online First: Epub Date].
- 6 54. Lugli A, Tornillo L, Cathomas G, et al. Colon et rectum. In: Dirnhofer S, Bubendorf L, Lehr H-  
7 A, et al., eds. *Recommandations pour la qualité - SSPath*. Bâle: Société Suisse de  
8 Pathologie, 2011.
- 9 55. Washington K, Berlin J, Branton P, et al. Protocol for the examination of specimens from  
10 patients with primary carcinoma of the colon and rectum. Vers. 3.1.0.0. In: Pathologists  
11 CoA, ed. *Cancer protocols and Checklists*, 2011.
- 12 56. MacDonald AJ, McEwan H, McCabe M, et al. Age at death of patients with colorectal cancer  
13 and the effect of lead-time bias on survival in elective vs emergency surgery. *Colorectal Dis*  
14 2011;**13**(5):519-25  
15 doi: CDI2183 [pii]10.1111/j.1463-1318.2009.02183.x[published Online First: Epub Date].
- 16 57. Ascanelli S, Navarra G, Tonini G, et al. Early and late outcome after surgery for colorectal  
17 cancer: elective versus emergency surgery. *Tumori* 2003;**89**(1):36-41
- 18 58. Biondo S, Marti-Rague J, Kreisler E, et al. A prospective study of outcomes of emergency and  
19 elective surgeries for complicated colonic cancer. *Am J Surg* 2005;**189**(4):377-83  
20 doi: S0002-9610(05)00085-1 [pii]10.1016/j.amjsurg.2005.01.009[published Online First:  
21 Epub Date].
- 22 59. Thompson GA, Cocks JR, Collopy BT, et al. Clinical indicators in colorectal surgery. *J Qual*  
23 *Clin Pract* 1996;**16**(1):31-5; discussion 37
- 24 60. Morris EJ, Taylor EF, Thomas JD, et al. Thirty-day postoperative mortality after colorectal  
25 cancer surgery in England. *Gut* 2011;**60**(6):806-13  
26 doi: gut.2010.232181 [pii]10.1136/gut.2010.232181[published Online First: Epub Date].
- 27 61. McArdle CS, McKee RF, Finlay IG, et al. Improvement in survival following surgery for  
28 colorectal cancer. *Br J Surg* 2005;**92**(8):1008-13  
29 doi: 10.1002/bjs.4874[published Online First: Epub Date].
- 30 62. Rutten HJ, den Dulk M, Lemmens VE, et al. Controversies of total mesorectal excision for  
31 rectal cancer in elderly patients. *Lancet Oncol* 2008;**9**(5):494-501  
32 doi: S1470-2045(08)70129-3 [pii]10.1016/S1470-2045(08)70129-3[published Online First:  
33 Epub Date].
- 34 63. Rogers SO, Jr., Ayanian JZ, Ko CY, et al. Surgeons' volume of colorectal cancer procedures and  
35 collaborative decision-making about adjuvant therapies. *Ann Surg* 2009;**250**(6):895-900  
36 doi: 10.1097/SLA.0b013e3181afe0c6[published Online First: Epub Date].
- 37 64. Kurtz JE, Heitz D, Serra S, et al. Adjuvant chemotherapy in elderly patients with colorectal  
38 cancer. A retrospective analysis of the implementation of tumor board recommendations in a  
39 single institution. *Crit Rev Oncol Hematol* 2010;**74**(3):211-7  
40 doi: S1040-8428(09)00120-6 [pii]10.1016/j.critrevonc.2009.05.003[published Online First:  
41 Epub Date].
- 42 65. Jarry J, Faucheron JL, Moreno W, et al. Delayed colo-anal anastomosis is an alternative to  
43 prophylactic diverting stoma after total mesorectal excision for middle and low rectal  
44 carcinomas. *Eur J Surg Oncol* 2010;**37**(2):127-33  
45 doi: S0748-7983(10)00607-4 [pii]10.1016/j.ejso.2010.12.008[published Online First: Epub  
46 Date].
- 47 66. Junginger T, Gonner U, Trinh TT, et al. Permanent stoma after low anterior resection for rectal  
48 cancer. *Dis Colon Rectum* 2010;**53**(12):1632-9  
49 doi: 10.1007/DCR.0b013e3181ed0aae00003453-201012000-00007 [pii][published Online  
50 First: Epub Date].
- 51 67. Neuman HB, Patil S, Fuzesi S, et al. Impact of a Temporary Stoma on the Quality of Life of  
52 Rectal Cancer Patients Undergoing Treatment. *Ann Surg Oncol* 2010  
53 doi: 10.1245/s10434-010-1446-9[published Online First: Epub Date].
- 54  
55  
56  
57  
58  
59  
60

- 1  
2  
3 68. Ramirez JM, Aguilera V, Valencia J, et al. Transanal endoscopic microsurgery for rectal  
4 cancer. Long-term oncologic results. *Int J Colorectal Dis* 2011  
5 doi: 10.1007/s00384-011-1132-9[published Online First: Epub Date]].
- 6 69. Lezoche G, Guerrieri M, Baldarelli M, et al. Transanal endoscopic microsurgery for 135  
7 patients with small nonadvanced low rectal cancer (iT1-iT2, iN0): short- and long-term  
8 results. *Surg Endosc* 2010  
9 doi: 10.1007/s00464-010-1347-9[published Online First: Epub Date]].
- 10 70. Doornebosch PG, Tollenaar RA, De Graaf EJ. Is the increasing role of Transanal Endoscopic  
11 Microsurgery in curation for T1 rectal cancer justified? A systematic review. *Acta Oncol*  
12 2009;**48**(3):343-53  
13 doi: 904089695 [pii]10.1080/02841860802342408[published Online First: Epub Date]].
- 14 71. Elferink MA, Siesling S, Lemmens VE, et al. Variation in Lymph Node Evaluation in Rectal  
15 Cancer: A Dutch Nationwide Population-Based Study. *Ann Surg Oncol* 2010  
16 doi: 10.1245/s10434-010-1269-8[published Online First: Epub Date]].
- 17 72. Elferink MA, Siesling S, Visser O, et al. Large variation between hospitals and pathology  
18 laboratories in lymph node evaluation in colon cancer and its impact on survival, a  
19 nationwide population-based study in the Netherlands. *Ann Oncol* 2011;**22**(1):110-7  
20 doi: mdq312 [pii]10.1093/annonc/mdq312[published Online First: Epub Date]].
- 21 73. Kelder W, Inberg B, Schaapveld M, et al. Impact of the number of histologically examined  
22 lymph nodes on prognosis in colon cancer: a population-based study in the Netherlands. *Dis*  
23 *Colon Rectum* 2009;**52**(2):260-7  
24 doi: 10.1007/DCR.0b013e318197916400003453-200902000-00013 [pii][published Online  
25 First: Epub Date]].
- 26 74. Vather R, Sarmour T, Kahokehr A, et al. Lymph node evaluation and long-term survival in  
27 Stage II and Stage III colon cancer: a national study. *Ann Surg Oncol* 2009;**16**(3):585-93  
28 doi: 10.1245/s10434-008-0265-8[published Online First: Epub Date]].
- 29 75. Lindebjerg J, Spindler KL, Ploen J, et al. The prognostic value of lymph node metastases and  
30 tumour regression grade in rectal cancer patients treated with long-course preoperative  
31 chemoradiotherapy. *Colorectal Dis* 2009;**11**(3):264-9  
32 doi: CD11599 [pii]10.1111/j.1463-1318.2008.01599.x[published Online First: Epub Date]].
- 33 76. Choi HK, Law WL, Poon JT. The optimal number of lymph nodes examined in stage II  
34 colorectal cancer and its impact of on outcomes. *BMC Cancer* 2010;**10**:267  
35 doi: 1471-2407-10-267 [pii]10.1186/1471-2407-10-267[published Online First: Epub Date]].
- 36 77. Nelson H, Petrelli N, Carlin A, et al. Guidelines 2000 for colon and rectal cancer surgery. *J Natl*  
37 *Cancer Inst* 2001;**93**(8):583-96
- 38 78. Smith AJ, Driman DK, Spithoff K, et al. Guideline for optimization of colorectal cancer surgery  
39 and pathology. *J Surg Oncol* 2010;**101**(1):5-12  
40 doi: 10.1002/jso.21395[published Online First: Epub Date]].
- 41 79. Andre T, Boni C, Navarro M, et al. Improved overall survival with oxaliplatin, fluorouracil, and  
42 leucovorin as adjuvant treatment in stage II or III colon cancer in the MOSAIC trial. *J Clin*  
43 *Oncol* 2009;**27**(19):3109-16  
44 doi: JCO.2008.20.6771 [pii]10.1200/JCO.2008.20.6771[published Online First: Epub Date]].
- 45 80. Twelves C, Wong A, Nowacki MP, et al. Capecitabine as adjuvant treatment for stage III colon  
46 cancer. *N Engl J Med* 2005;**352**(26):2696-704  
47 doi: 352/26/2696 [pii]10.1056/NEJMoa043116[published Online First: Epub Date]].
- 48 81. Van Cutsem E, Labianca R, Bodoky G, et al. Randomized phase III trial comparing biweekly  
49 infusional fluorouracil/leucovorin alone or with irinotecan in the adjuvant treatment of stage  
50 III colon cancer: PETACC-3. *J Clin Oncol* 2009;**27**(19):3117-25  
51 doi: JCO.2008.21.6663 [pii]10.1200/JCO.2008.21.6663[published Online First: Epub Date]].
- 52 82. Sobrero A. Lower GI. In: *ESMO*, ed. *ESMO Highlights 2010*, 2010.
- 53  
54  
55  
56  
57  
58  
59  
60

- 1  
2  
3 83. Des Guetz G, Nicolas P, Perret GY, et al. Does delaying adjuvant chemotherapy after curative  
4 surgery for colorectal cancer impair survival? A meta-analysis. *Eur J Cancer*  
5 2010;**46**(6):1049-55  
6 doi: S0959-8049(10)00039-0 [pii]10.1016/j.ejca.2010.01.020[published Online First: Epub  
7 Date]].
- 8 84. Dienstmann R, Vilar E, Taberero J. Molecular predictors of response to chemotherapy in  
9 colorectal cancer. *Cancer J* 2011;**17**(2):114-26  
10 doi: 10.1097/PPO.0b013e318212f84400130404-201103000-00007 [pii][published Online  
11 First: Epub Date]].
- 12 85. Van Cutsem E, Kohne CH, Hitre E, et al. Cetuximab and chemotherapy as initial treatment for  
13 metastatic colorectal cancer. *N Engl J Med* 2009;**360**(14):1408-17  
14 doi: 360/14/1408 [pii]10.1056/NEJMoa0805019[published Online First: Epub Date]].
- 15 86. Hutchins G, Southward K, Handley K, et al. Value of mismatch repair, KRAS, and BRAF  
16 mutations in predicting recurrence and benefits from chemotherapy in colorectal cancer. *J*  
17 *Clin Oncol* 2011;**29**(10):1261-70  
18 doi: JCO.2010.30.1366 [pii]10.1200/JCO.2010.30.1366[published Online First: Epub Date]].
- 19 87. Van Cutsem E, Nordlinger B, Cervantes A. Advanced colorectal cancer: ESMO Clinical  
20 Practice Guidelines for treatment. *Ann Oncol* 2010;**21**(suppl. 5):v93-v97
- 21 88. Glimelius B, Holm T, Blomqvist L. Chemotherapy in addition to preoperative radiotherapy in  
22 locally advanced rectal cancer - a systematic overview. *Rev Recent Clin Trials*  
23 2008;**3**(3):204-11
- 24 89. Glimelius B, Pahlman L, Cervantes A. Rectal cancer: ESMO Clinical Practice Guidelines for  
25 diagnosis, treatment and follow-up. *Ann Oncol* 2010;**21**(suppl. 5):v82-v86
- 26 90. Landheer ML, Therasse P, van de Velde CJ. The importance of quality assurance in surgical  
27 oncology in the treatment of colorectal cancer. *Surg Oncol Clin N Am* 2001;**10**(4):885-914,  
28 x
- 29 91. Wagner G. *Tumor-Lokalisationschlüssel. International Classification of Diseases for Oncology*  
30 *ICD-O, 2. Topographischer Teil*. 5th ed. Berlin: Springer-Verlag, 1993.  
31  
32  
33  
34  
35  
36  
37  
38  
39  
40  
41  
42  
43  
44  
45  
46  
47  
48  
49  
50  
51  
52  
53  
54  
55  
56  
57  
58  
59  
60

**APPENDIX (List of Collaborators)**

Members of the QC<sub>3</sub> CRC Working Group are listed as following:

*Barizzi J., Clinical Pathology, Cantonal Institute of Pathology, 6600 Locarno, Switzerland; Bihl F., Gastroenterology Dept., Ospedale Regionale Bellinzona e Valli, 6500 Bellinzona Switzerland; Christoforidis D., General Surgery Dept., Ospedale Regionale di Lugano, 6900 Lugano, Switzerland; Franzetti-Pellanda A., Radiation Oncology Dept., Clinica Luganese, 6900 Lugano, Switzerland; Giovanella L., Nuclear Medicine Dept., Oncology Institute of Southern Switzerland (IOSI), 6500 Bellinzona, Switzerland; Heinkel J., Radiology Dept., Ospedale La Carità, 6600 Locarno, Switzerland; Maffei M., Gastroenterology Dept., Ospedale Regionale di Lugano, 6900 Lugano, Switzerland; Mazzucchelli L., Clinical Pathology, Cantonal Institute of Pathology, 6600 Locarno, Switzerland; Miazza B., Gastroenterology Dept., Ospedale Regionale di Lugano, 6900 Lugano, Switzerland; Pelloni A., General Surgery Dept., Ospedale La Carità, 6600 Locarno, Switzerland; Quattropani C., Gastroenterology Dept., Clinica Luganese, 6900 Lugano, Switzerland; Rosso R., General Surgery Dept., Ospedale Regionale di Lugano, 6900 Lugano, Switzerland; Saletti P., Medical Oncology Dept., Oncology Institute of Southern Switzerland (IOSI), 6500 Bellinzona, Switzerland; Valli M. C., Radiation Oncology Dept., Oncology Institute of Southern Switzerland (IOSI), 6500 Bellinzona, Switzerland; Varini M., Medical Oncology Dept., Clinica Sant'Anna, 6900 Lugano, Switzerland; Wytenbach R., Radiology Dept., Ospedale Regionale Bellinzona e Valli, 6500 Bellinzona, Switzerland.*

**FUNDING**

This work was supported by Krebsforschung Schweiz, grant number KFS – 02668-08-2010, and by Advisory Board Research Ente Ospedaliero Cantonale Bellinzona, grant number ABREOC 10/2010.

The funding sources have not any involvement in the study design, in the collection, analysis and interpretation of data, in the writing of the report and in the decision to submit the paper for publication.

**COMPETING INTERESTS**

The Authors have no competing interests.

**DATA SHARING**

There is no additional data available.



## AUTHORS' CONTRIBUTION

I declare that V. Bianchi, A. Bordoni, A. Spitale and L. Mazzucchelli have directly participated in the planning of the manuscript; that V. Bianchi, A. Bordoni, A. Spitale and the QC<sub>3</sub> Colorectal Working Group have directly participated in the conducting of the project; that V. Bianchi, A. Bordoni, A. Spitale and L. Ortelli have directly participated in the reporting, acquisition of data or analysis and interpretation of data; and that V. Bianchi and A. Bordoni are responsible for the overall content as guarantors of the work. Finally, I declare that all the Authors have drafted and revised the paper critically for important intellectual content, and that they have given final approval of the version published. None of the Authors have competing interests.

## ACKNOWLEDGEMENTS

We are particularly grateful to the QC<sub>3</sub> CRC AB Members, who contribute to critically review the QC<sub>3</sub> CRC QI, for their precious collaboration:

*Prof. Franco Cavalli, Scientific Director, Oncologic Institute of Italian Switzerland (IOSI), Bellinzona, Switzerland; Prof. Gian Dorta, Director, Digestive Endoscopy Dept., Centre Hospitalier Universitaire Vaudois (CHUV), Lausanne, Switzerland; Prof. Jean Faivre, Director, Registre Bourguignon des Cancers Digestifs, Dijon Cedex, France; Prof. Stefano Fanti, Director, PET Center, Policlinico S. Orsola-Malpighi, Bologna, Italy; Prof. Roberto Labianca, Director, Oncology and Haematology Dept., Ospedali Riuniti, Bergamo, Italy; Prof. Sebastiano Martinoli, Director, General Surgery Dept., Clinica Luganese, Lugano, Switzerland; Prof. Philip Quirke, Director, Leeds Institute of Molecular Medicine (LIMM), Section of Pathology, Wellcome Trust Brenner Building, St James's University Hospital, Leeds, United Kingdom; Prof. Emmanuel Tiret, Chef Pôle Digestif des Hôpitaux Univesitaires Paris Est, Chef Service de Chirurgie Générale et Digestive, Hôpital Saint-Antoine, Paris, France; Prof. Vincenzo Valentini, Director, Unità*

1  
2  
3  
4  
5  
6  
7  
8  
9  
10  
11  
12  
13  
14  
15  
16  
17  
18  
19  
20  
21  
22  
23  
24  
25  
26  
27  
28  
29  
30  
31  
32  
33  
34  
35  
36  
37  
38  
39  
40  
41  
42  
43  
44  
45  
46  
47  
48  
49  
50  
51  
52  
53  
54  
55  
56  
57  
58  
59  
60

*Operativa Complessa Radioterapia 1, Policlinico Universitario Agostino Gemelli, Rome, Italy;*  
*Prof. Dominik Weishaupt, Director, Radiology Dept., Stadtspital Triemli, Zürich, Switzerland.*

For peer review only



**COPYRIGHT**

The Corresponding Author has the right to grant on behalf of all Authors and does grant on behalf of all Authors, an exclusive licence on a worldwide basis to the BMJ Publishing Group Ltd, and its Licensees to permit this article (if accepted) to be published in BMJ Open and any other BMJPGGL products to exploit all subsidiary rights, as set out in your licence and the Corresponding Author accepts and understands that any supply made under these terms is made by BMJPGGL to the Corresponding Author.

For peer review only

1  
2  
3  
4  
5  
6  
7  
8  
9  
10  
11  
12  
13  
14  
15  
16  
17  
18  
19  
20  
21  
22  
23  
24  
25  
26  
27  
28  
29  
30  
31  
32  
33  
34  
35  
36  
37  
38  
39  
40  
41  
42  
43  
44  
45  
46  
47  
48  
49  
50  
51  
52  
53  
54  
55  
56  
57  
58  
59  
60

**LEGENDS TO FIGURES**

**FIGURE 1** - Process used to select quality indicators for colorectal cancer care

QI = Quality Indicators; QC<sub>3</sub> CRC-WG = QC3 Colorectal Cancer Working Group; AB = Advisory Board

For peer review only

Figure 1. Process used to select quality indicators for colorectal cancer care

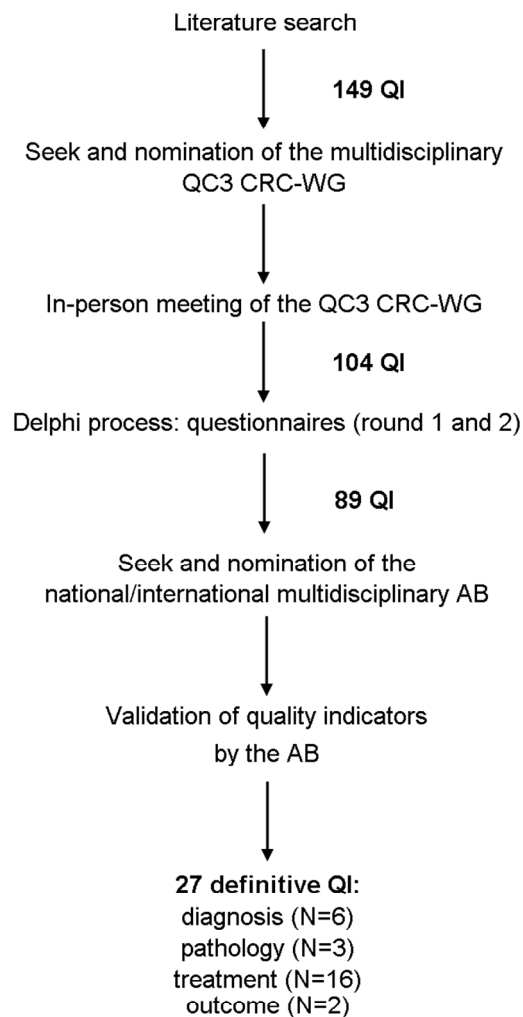

QI= Quality Indicators; QC3 CRC-WG: QC3 Colorectal Cancer Working Group; AB: Advisory Board

102x131mm (300 x 300 DPI)

**Table 1. Quality indicators of colorectal cancer care according to diagnostic-therapeutic process (diagnosis, pathology, treatment, outcome) and tumour site**

| TUMOUR SITE            | QUALITY INDICATOR                                                                                                                                                                                                                                                                                                                                                                                                                                                                                                                                   | DENOMINATOR                                                                  | REFERENCES         |
|------------------------|-----------------------------------------------------------------------------------------------------------------------------------------------------------------------------------------------------------------------------------------------------------------------------------------------------------------------------------------------------------------------------------------------------------------------------------------------------------------------------------------------------------------------------------------------------|------------------------------------------------------------------------------|--------------------|
| <b>DIAGNOSIS (n=6)</b> |                                                                                                                                                                                                                                                                                                                                                                                                                                                                                                                                                     |                                                                              |                    |
| C&R                    | Proportion of patients with colorectal cancer and diagnosis based on symptoms vs screening vs accidental finding                                                                                                                                                                                                                                                                                                                                                                                                                                    | Patients with colorectal cancer                                              | [41-45]            |
| C&R                    | Proportion of patients with colorectal cancer, evaluated by preoperative colonoscopy                                                                                                                                                                                                                                                                                                                                                                                                                                                                | Patients with colorectal cancer undergoing surgery                           | [7, 26-27, 46]     |
| R                      | Proportion of patients with rectal cancer and description of the tumour localization (distance <i>ab ano</i> ) in the endoscopic/pathologic documentation                                                                                                                                                                                                                                                                                                                                                                                           | Patients with rectal cancer undergoing endoscopy                             | [1, 47-48]         |
| C&R                    | Proportion of patients with colorectal cancer and requests for an initial CT and/or a MRI examination completed by clinical information according to the ACR guidelines                                                                                                                                                                                                                                                                                                                                                                             | Patients with colorectal cancer undergoing initial CT and/or MRI examination | [7, 49]            |
| R                      | Proportion of patients with low rectal # cancer undergoing pelvic MRI of staging                                                                                                                                                                                                                                                                                                                                                                                                                                                                    | Patients with low rectal cancer                                              | [50-52]            |
| R                      | Proportion of patients with rectal cancer and a preoperative MRI reporting the description of the radial margin status (mm)                                                                                                                                                                                                                                                                                                                                                                                                                         | Patients with rectal cancer undergoing preoperative MRI                      | [53]               |
| <b>PATHOLOGY (n=3)</b> |                                                                                                                                                                                                                                                                                                                                                                                                                                                                                                                                                     |                                                                              |                    |
| R                      | Proportion of patients with rectal cancer for which the request for the pathological examination includes the information of neo-adjuvant RT±ChT                                                                                                                                                                                                                                                                                                                                                                                                    | Patients with rectal cancer undergoing neo-adjuvant RT±ChT and surgery       | Proposed by CRC-WG |
| C&R                    | Proportion of patients with colorectal cancer and a sufficient number of tumour samples (≥3)                                                                                                                                                                                                                                                                                                                                                                                                                                                        | Patients with colorectal cancer undergoing surgery                           | Proposed by CRC-WG |
| C&R                    | Proportion of patients with colorectal cancer and a definitive pathological report including the following characteristics: surgical intervention, sample length, tumour localization according to WHO, tumour size, histological type according to WHO, histological grade, resection margins, lympho-vascular invasion, perineural invasion, tumour deposits (discontinuous extramural extension), pathological staging (AJCC pTNM), number of retrieved lymph nodes, treatment effect, macroscopic integrity of the mesorectum (for rectum only) | Patients with colorectal cancer undergoing surgery                           | [54-55]            |

| <b>TREATMENT (n=16)</b> |                                                                                                                                                                                                                                                                             |                                                                                                 |                        |
|-------------------------|-----------------------------------------------------------------------------------------------------------------------------------------------------------------------------------------------------------------------------------------------------------------------------|-------------------------------------------------------------------------------------------------|------------------------|
| C&R                     | Proportion of patients with colorectal cancer operated in emergency <sup>§</sup>                                                                                                                                                                                            | Patients with colorectal cancer undergoing surgery                                              | [56-58]                |
| C&R                     | Proportion of patients with colorectal cancer and dead within 30 days and 6 months from the surgery (postoperative mortality)                                                                                                                                               | Patients with colorectal cancer undergoing surgery                                              | [59-62]                |
| C&R                     | Proportion of patients with colorectal cancer and postoperative multidisciplinary discussion                                                                                                                                                                                | Patients with colorectal cancer undergoing surgery                                              | [63-64]                |
| R                       | Proportion of patients with malignant rectal polyp (pT1) and complete endoscopic polypectomy                                                                                                                                                                                | Patients with malignant rectal polyp (pT1)                                                      | Proposed by the CRC-WG |
| R                       | Proportion of patients with low rectal <sup>#</sup> cancer and surgical intervention with sphincter preservation                                                                                                                                                            | Patients with low rectal cancer undergoing surgery                                              | [7, 65-67]             |
| R                       | Proportion of patients with rectal cancer undergoing TEM with R0 resection                                                                                                                                                                                                  | Patients with rectal cancer undergoing TEM                                                      | [68-70]                |
| C&R                     | Proportion of patients with colorectal cancer and a number of resected lymph nodes $\geq 12$                                                                                                                                                                                | Patients with colorectal cancer undergoing surgery, but no neo-adjuvant therapy                 | [7, 26-27, 46, 71-76]  |
| C&R                     | Proportion of patients with colorectal cancer operated on with free margins                                                                                                                                                                                                 | Patients with colorectal cancer undergoing surgery                                              | [7, 77-78]             |
| C&R                     | Proportion of patients with colorectal cancer and AJCC TNM clinical stage I (from T2N0M0) to III (any T, N1M0) undergoing a surgical resection with anastomosis                                                                                                             | Patients with colorectal cancer and AJCC TNM stage I (from T2N0M0) to III                       | [26-27, 77-78]         |
| C                       | Proportion of patients with colon cancer and AJCC TNM stage II (T3N0M0, T4N0M0) high-risk (presence of at least one of the following factors: LN<12, G3, lymph-vascular or perineural invasion, tumour obstruction, tumour perforation, pT4) or III undergoing adjuvant ChT | Patients with colon cancer and AJCC TNM stage II high-risk or III                               | [26-27, 46, 79-82]     |
| C                       | Proportion of patients with colon cancer AJCC TNM stage II high-risk or stage III undergoing adjuvant ChT within 8 weeks from surgical resection                                                                                                                            | Patients with colon cancer and AJCC TNM stage II high-risk or III undergoing adjuvant ChT       | [83]                   |
| C&R                     | Proportion of patients with colorectal cancer and histology of the primary tumour or metastases obtained before the beginning of ChT                                                                                                                                        | Patients with colorectal cancer undergoing primary ChT                                          | [26-27]                |
| C&R                     | Proportion of patients with colorectal cancer and unresectable metastases undergoing first-line ChT or bio-ChT                                                                                                                                                              | Patients with colorectal cancer and unresectable metastases                                     | [84-87]                |
| C&R                     | Proportion of patients with colorectal cancer and hepatic metastases primarily unresectable turned into resectable metastases after neo-adjuvant ChT                                                                                                                        | Patients with colorectal cancer and unresectable hepatic metastases undergoing neo-adjuvant ChT | [87]                   |

|                      |                                                                                                                                             |                                                                                |         |
|----------------------|---------------------------------------------------------------------------------------------------------------------------------------------|--------------------------------------------------------------------------------|---------|
| R                    | Proportion of patients with locally advanced rectal cancer (T3-4 and/or any T, N+ and M0) undergoing neo-adjuvant RT±ChT                    | Patients with locally advanced rectal cancer                                   | [88-89] |
| R                    | Proportion of patients with rectal cancer and undergoing neo-adjuvant RT±ChT operated within 6-8 weeks after the end of neo-adjuvant RT±ChT | Patients with rectal cancer undergoing neo-adjuvant RT±ChT followed by surgery | [89]    |
| <b>OUTCOME (n=2)</b> |                                                                                                                                             |                                                                                |         |
| C&R                  | Analysis of overall survival at 1, 3, 5 and 10 years from diagnosis                                                                         | Patients with colorectal cancer                                                | [7, 90] |
| C&R                  | Analysis of disease-free survival                                                                                                           | Patients with colorectal cancer curatively treated                             | [7, 90] |

**Abbreviation:**

**C&R**= colon-rectum; **C**= colon; **R**= rectum; **ACR**= American College of Radiology; **CT**= computed tomography; **MRI**= magnetic resonance imaging; **AJCC**= American Joint Committee on Cancer; **RT**= radiotherapy; **ChT**= chemotherapy; **WHO**= World Health Organization; **TEM**= transanal endoscopic microsurgery.

§emergency: within 24 hours from the onset of symptoms; #low rectum: 4 to 7.5 cm from the dentate line [91]



## Quality indicators of Clinical Cancer Care (QC<sub>3</sub>) in colorectal cancer

|                                 |                                                                                                                                                                                                                                                                                                                                                                                   |
|---------------------------------|-----------------------------------------------------------------------------------------------------------------------------------------------------------------------------------------------------------------------------------------------------------------------------------------------------------------------------------------------------------------------------------|
| Journal:                        | <i>BMJ Open</i>                                                                                                                                                                                                                                                                                                                                                                   |
| Manuscript ID:                  | bmjopen-2013-002818.R1                                                                                                                                                                                                                                                                                                                                                            |
| Article Type:                   | Research                                                                                                                                                                                                                                                                                                                                                                          |
| Date Submitted by the Author:   | 02-May-2013                                                                                                                                                                                                                                                                                                                                                                       |
| Complete List of Authors:       | Bianchi, Valentina; Cantonal Institute of Pathology, Ticino Cancer Registry Spitale, Alessandra; Cantonal Institute of Pathology, Ticino Cancer Registry Ortelli, Laura; Cantonal Institute of Pathology, Ticino Cancer Registry Mazzucchelli, Luca; Cantonal Institute of Pathology, Clinical Pathology Bordoni, Andrea; Cantonal Institute of Pathology, Ticino Cancer Registry |
| <b>Primary Subject Heading</b>: | Qualitative research                                                                                                                                                                                                                                                                                                                                                              |
| Secondary Subject Heading:      | Oncology                                                                                                                                                                                                                                                                                                                                                                          |
| Keywords:                       | QUALITATIVE RESEARCH, Quality in health care < HEALTH SERVICES ADMINISTRATION & MANAGEMENT, Gastrointestinal tumours < ONCOLOGY, Gastrointestinal tumours < GASTROENTEROLOGY                                                                                                                                                                                                      |
|                                 |                                                                                                                                                                                                                                                                                                                                                                                   |

SCHOLARONE™  
Manuscripts

1  
2  
3 **Original Article**  
4  
5  
6

7 **Quality indicators of Clinical Cancer Care (QC<sub>3</sub>) in colorectal cancer**  
8  
9

10  
11  
12 Valentina Bianchi<sup>1</sup>, Alessandra Spitale<sup>1</sup>, Laura Ortelli<sup>1</sup>, Luca Mazzucchelli<sup>2</sup>, Andrea Bordoni<sup>1</sup> and  
13 the QC<sub>3</sub> CRC Working Group<sup>3</sup>  
14  
15  
16

17  
18  
19 <sup>1</sup>Cantonal Institute of Pathology, Ticino Cancer Registry, 6600 Locarno, Switzerland  
20

21 <sup>2</sup>Cantonal Institute of Pathology, Clinical Pathology, 6600 Locarno, Switzerland  
22

23 <sup>3</sup>Members of the QC<sub>3</sub> Colorectal Working Group are listed in the Appendix  
24  
25  
26  
27

28 **Running title: Quality indicators of clinical care in colorectal cancer**  
29  
30  
31

32 **Corresponding author:**  
33

34 Valentina Bianchi, M.D., Cantonal Institute of Pathology, Ticino Cancer Registry, , Via in Selva  
35 24, 6600 Locarno, Switzerland - e-mail: [valentina.bianchi-galdi@ti.ch](mailto:valentina.bianchi-galdi@ti.ch); phone: +41 91 8160826;  
36  
37 fax: +41 91 8160829  
38  
39  
40  
41  
42

43 **Key words:** *quality of cancer care, colorectal cancer, quality indicators, cancer registry,*  
44 *population-based study*  
45  
46  
47  
48

49 **Word count: 3702 (excluding the Abstract)**  
50  
51  
52  
53  
54  
55  
56  
57  
58  
59  
60



## ABSTRACT

**Objectives:** Assessing the quality of cancer care (QoCC) has become increasingly important to providers, regulators and purchasers of care worldwide. Aim of this study was to develop evidence-based quality indicators (QI) for colorectal cancer (CRC) to be applied in a population-based setting.

**Design:** A comprehensive evidence-based literature search was performed to identify the initial list of QI, which were then selected and developed using a two-step modified Delphi process involving two multidisciplinary expert panels with expertise in colorectal cancer care, quality of care and epidemiology.

**Setting:** The QC<sub>3</sub> population-based project, which involve all the public and private hospitals and clinics present on the territory of Canton Ticino (South Switzerland).

**Participants:** Ticino Cancer Registry, The Colorectal Cancer Working Group (CRC-WG) and the external academic Advisory Board (AB).

**Main outcome measures:** Set of quality indicators (QI) which encompass the whole diagnostic-treatment process of colorectal cancer.

**Results:** Of the 149 QI emerged from 181 sources of literature, 104 were selected during the in-person meeting of the CRC-WG. During the Delphi process, the CRC-WG shortened the list to 89 QI. The AB finally validated 27 QI according to the phase of care: diagnosis (N=6), pathology (N=3), treatment (N=16), and outcome (N=2).

**Conclusions:** Using the validated Delphi methodology, including literature review of the evidence and integration of expert opinions from local clinicians and international experts we were able to develop a list of QI to assess QoCC for CRC. This will hopefully guarantee feasibility of data retrieval, acceptance and translation of QI into the daily clinical practice to improve QoCC. Moreover, evidence-based selected QI allow to assess immediate changes and improvements in the diagnostic-therapeutic process that could be translated in a short-term benefit for patients with a possible gaining both in overall and disease-free survival.

## ARTICLE SUMMARY

### Article focus

- Quality of Cancer care (QoCC) studies on specific quality indicators (QI) developed worldwide since the late '90s showed both a continuous improvement of oncologic care provided by the clinical structures involved and an increased availability of specialized care in the considered areas.
- This study aims to define evidence-based QI for colorectal cancer (CRC) care, in order to favour a feasible evaluation of the oncologic diagnostic-therapeutic process from a population-based cancer registration and data collection point of view.

### Key messages

- QI should be defined, developed and tested with scientific evidence-based rigor in a careful and transparent manner, taking into account their degree of relevancy, validity, reliability and feasibility.
- The selected CRC QI can be applied in a population-based setting, implying the inclusion of the elderly, considering age an extremely important determinant of treatment.

### Strengths and limitations of this study

- To develop the CRC QI we used a formal iterative process, the RAND/UCLA Appropriateness Methodology widely diffused and validated within other QoCC research. The selected QI are representative of the main steps of the diagnostic-therapeutic process.
- Due to the evidence that research studies demonstrated that single-discipline panels select different indicators than do multidisciplinary panels and to maximize the applicability of CRC QI, we constituted two panels of experts, a local Working Group and an external national/international academic Advisory Board, which could offer a multidisciplinary perspective on practice and who can guarantee that the selected QI and their results will be comparable with national and international data.
- Possible limitations of the current work are the following:

- 1  
2  
3  
4  
5  
6  
7  
8  
9  
10  
11  
12  
13  
14  
15  
16  
17  
18  
19  
20  
21  
22  
23  
24  
25  
26  
27  
28  
29  
30  
31  
32  
33  
34  
35  
36  
37  
38  
39  
40  
41  
42  
43  
44  
45  
46  
47  
48  
49  
50  
51  
52  
53  
54  
55  
56  
57  
58  
59  
60
- the level of evidence found in the literature. This situation is common to many aspects of health care, and it was the reason that the expert panel methodology was developed – specifically, to identify the processes that are most likely to be valid measures of quality when the highest level of evidence is not available.
  - the literature selection could have missed some relevant articles. However, members of the Working Group were likely to be very familiar with the literature, and had the opportunity to suggest other indicators based on their experience and literature search; in this way, we believe to have integrated the best research evidence with clinical expertise.
  - the feasibility of measuring indicators in terms of data collection and calculation. However, both the Working Group and the Advisory Board were concerned about the feasibility, validity and reliability of clinical data collection, necessary for the calculation of each single indicator at the population-based level. In fact, in order to warrant an accurate measurement, those indicators reaching more than 70% of the agreement, confirming their scientific and clinical value, but evaluated at least by one of the experts not feasible and difficult to be collected at the population-based level, were definitely excluded. In this way, we have overcome the feasibility limit.

## INTRODUCTION

Research on QoCC performed during the last decade has demonstrated that the increase in knowledge on treatments with proven efficacy do not directly translate into optimal delivery of such treatments to patients. Moreover, accumulating evidence suggests that underuse and overuse of care may occur for patients with cancer.[1-2] In addition to survival analysis, to evaluate and compare quality of care at the population-based level, the assessment of QoCC has become increasingly important to providers, regulators and purchasers of care to growing demand for services, rising costs, constrained resources and evidence of variation in clinical practice.[3]

QoCC studies and structured programmes on specific quality indicators (QI) have been developed worldwide since the late '90s, showing both a continuous improvement of oncologic care provided by the clinical structures involved and an increased availability of specialized care in the considered areas. Most of these studies have been implemented at the regional level on a territory with uniform legislative, health and geographical characteristics, increasing the likelihood of recruitment of involved clinicians.[1 4-7]

So far, in Switzerland no population-based study on QoCC with a prospective design has been implemented. In addition to the yearly renewed international guidelines for each type of cancer, there is still the need to evaluate the real conditions of care in the community. Population-based Cancer Registry data are therefore essential to describe and reflect real world and routine care as well as to provide regular feedback to healthcare workers and decision makers about the management of a disease in the daily practice and those treatments that are routinely prescribed and/or effective in all patient groups.[8] Moreover, Cancer Registries represent an independent observatory, thus assuring a fair evaluation service, avoiding any conflicts of interest.

We, therefore, implemented the QC<sub>3</sub> project, focusing on QoCC about the diagnosis-treatment process in colon-rectum, prostate, uterus, ovary and lung cancers in the territory of Canton Ticino (South Switzerland).

1  
2  
3 Colorectal cancer (CRC) is an important health issue worldwide. It is the most common malignancy  
4  
5 in Europe (excluding non-melanoma skin cancers) and the second most common in terms of cancer-  
6  
7 related mortality.[9] In Switzerland, CRC is the second and third most frequent tumour in women  
8  
9 and men, respectively. About 4000 CRC cases are diagnosed annually, corresponding to a European  
10  
11 age-standardized incidence rate equal to 49.4 and 30.6 cases per 100'000 inhabitants in men and  
12  
13 women, respectively, and representing the 11% of all tumours.[10-12] CRC is the third leading  
14  
15 cancer cause of death in Switzerland, with approximately 1600 deaths/year, corresponding to a  
16  
17 European age-standardized mortality rate equal to 18.5 and 10.6 cases per 100'000 inhabitants in  
18  
19 men and women, respectively. With a 5-year survival probability equal to 60%, Switzerland is the  
20  
21 country with the most favourable prognosis in Europe.[13] A recent Swiss report with follow up to  
22  
23 2009 show an additional 5 year survival increase to 62%.[11]

24  
25  
26  
27 The aims of the QC<sub>3</sub> project are the following: 1) to define and confirm evidence-based QoCC  
28  
29 indicators for the tumour localizations above cited, in order to favour a feasible evaluation of the  
30  
31 oncologic diagnostic-therapeutic process from a population-based cancer registration and data  
32  
33 collection point of view; 2) to define and implement at the regional level standards of care for each  
34  
35 QoCC measure, in terms of minimum and target requirements. In the present report we will  
36  
37 describe the initial part of the QC<sub>3</sub> project, meaning the process followed to identify the panel of  
38  
39 specific QoCC indicators for the CRC, as well as the list of QoCC indicators identified and  
40  
41 approved both by a dedicated Working Group of local health care providers and by an external  
42  
43 independent Advisory Board, in a perspective of data collection feasibility by a population-based  
44  
45 cancer registry.  
46  
47  
48  
49  
50  
51  
52  
53  
54  
55  
56  
57  
58  
59  
60

## MATERIAL AND METHODS

The QC<sub>3</sub> project is a prospective, descriptive study on the QoCC to be implemented in a population-based setting; it is performed by the Ticino Cancer Registry on a 3-year time period (2011-2013) on the territory of Canton Ticino (South Switzerland). In this paper we focus on the initial part of the project: the identification of the CRC quality indicators which will be used to evaluate the QoCC about CRC in our region.

Quality indicators (QI) for CRC were developed involving a local expert panel, named QC<sub>3</sub> Colorectal Working Group (CRC-WG). Elected members, selected on the basis of their expertise and on their daily clinical involvement in CRC care, were contacted to have their interest confirmed in being involved. The final QC<sub>3</sub> CRC-WG encompassed two pathologists, four gastroenterologists, two oncologists, three surgeons, two radiologists, two radiation oncologists and one nuclear medicine specialist, for a total of 15 panellists all working in the public or in the private hospitals and clinics of Canton Ticino (see Appendix 1).

Published studies and references were identified through a comprehensive search on PubMed/MEDLINE, using initially specific strings/expressions, such as the following: “quality of care OR quality indicators AND colorectal cancer”, “diagnosis OR diagnostic AND quality indicators AND colorectal cancer”, “pathology OR pathological AND quality indicators AND colorectal cancer”, “surgery OR surgical AND quality indicators AND colorectal cancer”, “radiation oncology OR radiotherapy AND quality indicators AND colorectal cancer”, “chemotherapy AND quality indicators AND colorectal cancer”, “surveillance OR follow-up OR outcome AND quality indicators AND colorectal cancer”, “preoperative care OR perioperative care OR intraoperative care OR postoperative care AND colorectal cancer”, “population-based AND quality indicators AND colorectal cancer”. For each of the identified candidate indicators, we performed a systematic literature review to identify the highest level of evidence supporting the validity of that quality indicator for articles published from 1990 onwards. The reference list of the included articles were also examined to identify any additional article that had not been identified in

1  
2  
3 the MEDLINE search. We included all the peer-reviewed articles, but case reports, letters, abstracts  
4  
5 or editorials. If evidence at the highest level were limited or absent, then lower levels of evidence  
6  
7 were evaluated. For example, if data were not available from randomized controlled trials, cohort or  
8  
9 case-control studies, case series and expert opinion or clinical guidelines were reviewed. A  
10  
11 selection of already approved QI provided by the American Society of Clinical Oncology (ASCO),  
12  
13 the National Comprehensive Cancer Network (NCCN), the National Initiative on Cancer Care  
14  
15 Quality (NICCQ), the Quality Oncology Practice Initiative (QOPI) and the Florida Initiative for  
16  
17 Quality Cancer Care (FIQCC), were included in the evaluation list, with the aim to transfer them  
18  
19 from the clinical to the population-based setting.[1-2 4 7 14-20]  
20  
21

22  
23 The initial QI list emerged from 181 sources of literature, and it was proposed to the CRC-WG in  
24  
25 the context of an in-person meeting held at the very beginning of the process. The list was then left  
26  
27 to the QC<sub>3</sub> CRC-WG's evaluation for a period of two weeks. The participants were asked to provide  
28  
29 a whole opinion with written comments about those QI considered pertinent for the assessment of  
30  
31 CRC care quality, to suggest additional QI not already included in the list and to delete those QI  
32  
33 considered not suitable. In order to make the selection and evaluation easier, the QI were  
34  
35 subdivided in chapters recalling the Donabedian's and the National Initiative for Cancer Care  
36  
37 Quality schemes: diagnosis and staging, pathology, treatment, follow-up, outcome.[2 21]  
38  
39  
40  
41  
42

### 43 **Delphi Round 1**

44  
45 The QI selection was done by using a 2-step modified Delphi process.[22] The initial list of QI, re-  
46  
47 analyzed by the QC<sub>3</sub> CRC-WG, was formatted as a questionnaire, where for each indicator was  
48  
49 specified the numerator, the denominator and the sources of evidence from which it was extracted.  
50  
51 The questionnaire was distributed by regular mail to the QC<sub>3</sub> CRC-WG, so to maintain it  
52  
53 anonymous, along with a stamped, addressed return envelope and an attached letter with the  
54  
55 deadline date of two weeks from the receipt and the instruction for voting. Respondents were asked  
56  
57 to rate each QI adopting the RAND Appropriateness Methodology (scale 1 to 9, 1 = extremely  
58  
59  
60

1  
2  
3 inappropriate; 9 = extremely appropriate), according to selection criteria of relevance, scientific  
4  
5 soundness (validity, reliability, comparability) and feasibility (precise definition and specification,  
6  
7 data feasibility, reliability of data collection).[23-25] Each QI was judged as validated if it reached a  
8  
9 strong consensus for acceptance ( $\geq 70\%$  of the QC<sub>3</sub> CRC-WG rated the QI with a vote  $\geq 7$ ),  
10  
11 discarded if it reached a strong consensus for exclusion ( $\geq 70\%$  of the QC<sub>3</sub> CRC-WG rated the QI  
12  
13 with a votes  $\leq 3$ ) and in stand-by if there was an unclear consensus ( $4 \leq \text{votes} \leq 6$ ), which implies  
14  
15 an eventual in-person meeting.  
16  
17  
18  
19

## 20 21 **Delphi Round 2**

22  
23 The Delphi Round 2 questionnaire was performed with the same modalities of the first round and  
24  
25 enclosed the frequency distribution of round 1 votes, allowing the panellists to eventually alter their  
26  
27 responses, in the light of colleagues' assessments.[23]  
28  
29  
30  
31

## 32 **Advisory Board Review**

33  
34 The list of selected QI derived from the two Delphi rounds was then submitted to an independent  
35  
36 external national/international academic multidisciplinary Advisory Board (AB), in order to get an  
37  
38 additional evaluation on the suitability of QI as “quality” indexes according to the criteria shown in  
39  
40 the previous paragraph. The intent was to achieve at least one health professional for each specialty.  
41  
42 The AB included one pathologist, one gastroenterologist, two oncologists, two surgeons, one  
43  
44 radiologist, one radiation oncologist, one nuclear medicine specialist and one epidemiologist, for a  
45  
46 total of 10 experts in CRC care (see Acknowledgements); all the panellists are daily involved in the  
47  
48 CRC care and they had been contacted with the same modalities of the QC<sub>3</sub> CRC WG. The selected  
49  
50 QI as well as the corresponding literature sources were distributed to the AB as an electronic form  
51  
52 where their opinion about QI were expressed both as megatrends (i.e. response yes/no to the  
53  
54 suitability of each QI) and as eventual additional comments.[26] We considered every single QI as  
55  
56 finally approved by the AB if it achieved  $\geq 70\%$  of the agreement (i.e.  $\geq 70\%$  of respondents should  
57  
58  
59  
60



1  
2  
3 have answered “yes”). Besides the vote (“yes” *versus* “no”), the panellists had the chance to  
4  
5 comment the single QI from a population-based cancer registration and data collection point of  
6  
7 view. Therefore, those QI reaching more than 70% of the agreement, confirming their scientific and  
8  
9 clinical value, but evaluated at least by one of the experts “not completely feasible and difficult to  
10  
11 be collected at the population-based level”, were definitely excluded.  
12  
13  
14  
15  
16  
17  
18  
19  
20  
21  
22  
23  
24  
25  
26  
27  
28  
29  
30  
31  
32  
33  
34  
35  
36  
37  
38  
39  
40  
41  
42  
43  
44  
45  
46  
47  
48  
49  
50  
51  
52  
53  
54  
55  
56  
57  
58  
59  
60

## RESULTS

The QI selection process began in January 2011 and ended in December 2011.

Participation of CRC-WG members throughout the process was high: 15 (100%) participated to the in-person meeting, 12 (80%) completed both the Delphi round 1 and 2. The Delphi Round 1 questionnaire respondent time were in the range of 18 to 60 days, while for the Round 2, the delay time was in the range of 8 to 55 days; these delays and the time for recruitment of the AB influence the long time spent for this part of the project.

The Figure 1 summarizes the entire process used to select QI for CRC care. The literature search produces 181 citations dealing with CRC QoCC, including also already validated QI provided by the ASCO, NCCN, NCCQ, QOPI and FIQCC.[1-2 4 7 14-20] From this search, we initially selected a total of 149 QI, which were proposed to the CRC-WG in the context of the initial in-person meeting. The following discussion and revision reduced the list to 104 QI before the modified Delphi process started; these QI were divided into the following areas: diagnosis and staging, pathology, treatment, follow-up and outcome. After the whole Delphi process the list was shortened to 89 QI, distributed as following: diagnosis and staging (N=16), pathology (N=20), treatment (N=38), follow-up (N=10), and outcome (N=5). The QI finally underwent to the AB's evaluation; this last step, according to the procedure described in the methods, shortened the final list to 27 QI diagnosis (N=6), pathology (N=3); treatment (N=16), follow-up (N=0), and outcome (N=2). Table 1 reports detailed information for each QI: a) QI description; b) criteria for patients inclusion in the numerator and denominator; c) list of the necessary medical documentation that should be collected by the Cancer Registry to extract the needed and relevant information to build the specific QI, such as the report of the endoscopy, the pathology report of the biopsy and/or surgical resection, the preoperative radiological reports (e.g. TAC and MRI), the surgery report, the tumour board documentation, the oncological report, the radiotherapy report and database/documentation of the regional Office of Population Registry Rosters for the assessment of patients vital status (for outcome QI); d) QI rationale; e) related references.

## DISCUSSION

In the preliminary phase of the QC<sub>3</sub> project shown in this paper we developed a panel of evidence-based CRC QI which are suitable to be implemented in a population-based setting.

To develop the QC<sub>3</sub> QI we used a formal iterative process, the RAND/UCLA Appropriateness Methodology widely diffused and validated within other QoCC research.[23-24] Due to the evidence that research studies demonstrated that single-discipline panels select different indicators than do multidisciplinary panels and to maximize the applicability of QC<sub>3</sub> CRC QI, we constituted a working group which could offer a multidisciplinary perspective on practice, including specialists, professionals, clinicians and researchers coming from both public and private hospitals.[27-33] Moreover, we have used a further validation step enrolling an independent national/international academic AB. This choice was due to the aim of measuring QoCC within a Swiss region, with a point of view on the population-based data collection and evaluation, and of obtaining results which will be comparable with national and international data. We believe that the expertise and multidisciplinary representativeness of the QC<sub>3</sub> CRC-WG and of the AB will surely increase quality, acceptance and translation of QI into the daily clinical practice.

The selected QI are representative of the main steps of the diagnostic-therapeutic process. The diagnosis QI reflect the importance of a pre-operative evaluation and staging, reliable evaluation of the tumour localization and local invasion, and particularly for the rectal cancers, of a feasible and effective surgery. The first indicator of the “diagnosis” group is important to understand what happens in a territory where there is not an organized screening programme for colorectal cancers, but only an opportunistic screening strategy. If the tumour is detected because the physician submit the patients older than 50 years old to a fecal occult blood test (FOBT) or colonoscopy control or if a patient, being aware of the possible risk, asks his family doctor to undergo screening examinations, is an interesting data to be evaluated, also in the hypothesis of a colorectal cancer screening programme implementation. We, therefore, believe that a higher proportion of patients diagnosed through screening (FOBT or colonoscopy in asymptomatic patients) would represent a

1  
2  
3 higher diagnostic quality, since the therapeutic approach and, consequently, the patients outcome  
4  
5 (in terms of recurrence and survival) would be more favourable, as reported in the literature.[20 34-  
6  
7 39] The pathology QI reflect the importance of a good communication between clinicians and  
8  
9 pathologists in terms of patient's clinical history and consequent evaluation of the effectiveness of a  
10  
11 neo-adjuvant therapy; moreover, there is a need of standardization of the pathologic report  
12  
13 following the international guidelines (e.g. take at least three samples of tumour during the  
14  
15 macroscopy), not leaving any items unexplained or implicit. In particular, the third QI reported in  
16  
17 Table 1 (pathology section) refers to the surgical pathology report, which derives from the surgical  
18  
19 curative intervention and should be as complete as possible to be useful for the future decision  
20  
21 about patient's treatment. Our intent is to calculate it for all listed items considered together, but  
22  
23 also for each item individually analyzed: e.g. proportion of patients with colorectal cancer and a  
24  
25 definitive pathological report including the surgical intervention description; proportion of patients  
26  
27 with colorectal cancer and a definitive pathological report including the tumour size; proportion of  
28  
29 patients with colorectal cancer and a definitive pathological report including the resection margins;  
30  
31 proportion of patients with colorectal cancer and a definitive pathological report including the  
32  
33 pathological staging (AJCC pTNM); etc... The treatment QI cover the general issues of surgery,  
34  
35 such as emergency, postoperative mortality and a multidisciplinary discussion of the clinical case;  
36  
37 furthermore, they focus on the debate of the retrieved lymph nodes, on the timing between  
38  
39 radiotherapy and surgery, on the adjuvant chemotherapy and on the attitude towards the metastatic  
40  
41 patients. The two main items of the outcome chapter refers to the overall and disease-free survival.  
42  
43 Although it is necessary to wait for a certain follow-up period (i.e. 1, 3, 5 to 10 years from the date  
44  
45 diagnosis for the calculation of overall survival, and from the date of curative treatment for the  
46  
47 calculation of disease-free survival), they will represent the overall resume of the diagnostic and  
48  
49 treatment quality of CRC patients. Our intent will be to analyse overall and disease-free survival  
50  
51 according to some of the proposed QI (such as QI concerning the pathological characteristics of the  
52  
53 tumours, QI of the adjuvant chemotherapy in patients with colon cancer and AJCC TNM stage II  
54  
55  
56  
57  
58  
59  
60

1  
2  
3 high-risk or III, QI of colorectal patients operated on with free margins, QI of locally advanced  
4 rectal cancer patients undergoing neo-adjuvant radio±chemotherapy, etc... ). We will finally  
5 compare our results with other regional and national reality, favouring the interpretation of each  
6 single QI. Concerning the QI about follow-up, AB did not finally include any of them. Indeed,  
7 although the follow-up procedures are suggested by several international guidelines, they are based  
8 on level II-III evidence and controversies remain regarding selection of optimal strategies for  
9 following up patients after potentially curative CRC surgery.[40-43]

10  
11 The first limitation of the current work is the level of evidence found in the literature. For some  
12 indicators, strong evidence of their validity was not available from RCTs. However this situation is  
13 common to many aspects of health care, and it was the very reason that the expert panel  
14 methodology was developed – specifically, to identify the processes that are most likely to be valid  
15 measures of quality when the highest level of evidence is not available.[19 23 44] Secondly, we  
16 may have missed some studies during the literature search and, consequently, some QI has not been  
17 proposed to the QC<sub>3</sub> CRC-WG since the beginning of the QI revision process. However, this  
18 limitation should have been overcome by the fact that the members of the QC<sub>3</sub> CRC-WG were  
19 likely to be very familiar with the literature, and had the opportunity to suggest other QI based on  
20 their experience and literature search.[7 27-28 45] Thus we integrated the best research evidence  
21 with clinical expertise, as reported by Sackett *et al.*[46] A further limit could be the feasibility of  
22 measuring QI in terms of data collection and calculation, which is immediately the next step.

23  
24 Actually, the QI selected by both the QC<sub>3</sub> CRC-WG and the AB represent an ideal set of criteria to  
25 measure the quality of CRC care; at the same time they both were concerned about the feasibility,  
26 validity and reliability of clinical data collection, necessary for the calculation of each single QI at  
27 the population-based level. This is the reason why most of the identified QC<sub>3</sub> QI are common to  
28 many QoCC studies.[1-2 4 7 14-20] Besides the traditional Delphi process, the panellists had the  
29 chance to comment the single QI from a population-based cancer registration and data collection  
30 point of view. Therefore, in order to warrant an accurate measurement, those QI reaching more than  
31  
32  
33  
34  
35  
36  
37  
38  
39  
40  
41  
42  
43  
44  
45  
46  
47  
48  
49  
50  
51  
52  
53  
54  
55  
56  
57  
58  
59  
60

1  
2  
3 70% of the agreement, confirming their scientific and clinical value, but evaluated at least by one of  
4  
5 the experts not feasible and difficult to be collected at the population-based level, were definitely  
6  
7 excluded. In addition, we performed a retrospective preliminary pilot collection on the detailed and  
8  
9 necessary incidence data of CRC occurred in 2011, realising that the measurement of most QI is  
10  
11 feasible, whereas for some selected QI the retrieving of variables would need additional efforts;  
12  
13 some preliminary results were presented in national and international conferences and congresses,  
14  
15 receiving positive feedback by both the clinical and epidemiological setting.[47-50] Only the  
16  
17 definitive results will give us the proportion of missing information, whose magnitude will be  
18  
19 assessed.  
20  
21

22  
23 The selected QC<sub>3</sub> CRC QI will be applied in a population-based setting, where age is an extremely  
24  
25 important determinant of treatment. The elderly are rarely included in the randomized clinical trials  
26  
27 with the consequence of a possible “underuse of treatment”.[25 51-52] At a broad European level,  
28  
29 national audit registries in surgical oncology have led to improvements with a great impact and they  
30  
31 offered the possibility, as for our project, to perform research on patients that are usually excluded  
32  
33 from clinical trials such as elderly and co-morbid patients.[53-54] Evidence suggests that the  
34  
35 relative benefits of treatment for the elderly are similar to those seen for cancer patients in general,  
36  
37 though decision making for treatment becomes more complex as life expectancy, co-existing  
38  
39 illnesses, and functional status all need to be considered.[25 51-52] Applying these QI and if all  
40  
41 these items will be satisfied we can affirm to have a real good quality process of CRC care for the  
42  
43 whole population. The foreseeable future in quality evaluation and improvement for health care will  
44  
45 likely involve more and more frequently the use of QI by regulatory and accrediting agencies,  
46  
47 stakeholders, clinicians, individual hospitals and health care providers, as well as patients. This  
48  
49 underlines that the QI should be defined, developed and tested with scientific evidence-based rigor  
50  
51 in a careful and transparent manner, taking into account their degree of relevancy, validity,  
52  
53 reliability and feasibility.[30 32] Although QI have been defined in several different ways, all  
54  
55 authors agreed that the final aim is the improvement of patients outcome.[31 33 55]  
56  
57  
58  
59  
60

1  
2  
3 The systematic trend analysis of QI allows to assess immediate changes and improvements in the  
4 diagnostic-therapeutic process that could be translated in a short-term benefit for patient, without  
5 waiting for survival analysis typically needed some years to be produced because of the patients'  
6 follow-up. Furthermore, this system of evaluation and auto-evaluation could favour the surveillance  
7 and monitoring of the comprehensive level of the oncologic care in the region, the clinical  
8 performance homogeneity, the possible weakness of the clinical network, and finally the corrective  
9 interventions to be adopted to improve the QoCC.  
10  
11  
12  
13  
14  
15  
16  
17

18 With this study, we hope to increase the awareness of the value of QI in health care so to encourage  
19 more uniform practices and improve provider documentation of medical care in our region;  
20 moreover, we hope that standardization of QI among different regions will help to define threshold  
21 of minimal standard of care.  
22  
23  
24  
25  
26  
27  
28  
29  
30  
31  
32  
33  
34  
35  
36  
37  
38  
39  
40  
41  
42  
43  
44  
45  
46  
47  
48  
49  
50  
51  
52  
53  
54  
55  
56  
57  
58  
59  
60

**APPENDIX (List of Collaborators)**

Members of the QC<sub>3</sub> CRC Working Group are listed as following:

*Barizzi J., Clinical Pathology, Cantonal Institute of Pathology, 6600 Locarno, Switzerland; Bihl F., Gastroenterology Dept., Ospedale Regionale Bellinzona e Valli, 6500 Bellinzona Switzerland; Christoforidis D., General Surgery Dept., Ospedale Regionale di Lugano, 6900 Lugano, Switzerland; Franzetti-Pellanda A., Radiation Oncology Dept., Clinica Luganese, 6900 Lugano, Switzerland; Giovanella L., Nuclear Medicine Dept., Oncology Institute of Southern Switzerland (IOSI), 6500 Bellinzona, Switzerland; Heinkel J., Radiology Dept., Ospedale La Carità, 6600 Locarno, Switzerland; Maffei M., Gastroenterology Dept., Ospedale Regionale di Lugano, 6900 Lugano, Switzerland; Mazzucchelli L., Clinical Pathology, Cantonal Institute of Pathology, 6600 Locarno, Switzerland; Miazza B., Gastroenterology Dept., Ospedale Regionale di Lugano, 6900 Lugano, Switzerland; Pelloni A., General Surgery Dept., Ospedale La Carità, 6600 Locarno, Switzerland; Quattropani C., Gastroenterology Dept., Clinica Luganese, 6900 Lugano, Switzerland; Rosso R., General Surgery Dept., Ospedale Regionale di Lugano, 6900 Lugano, Switzerland; Saletti P., Medical Oncology Dept., Oncology Institute of Southern Switzerland (IOSI), 6500 Bellinzona, Switzerland; Valli M. C., Radiation Oncology Dept., Oncology Institute of Southern Switzerland (IOSI), 6500 Bellinzona, Switzerland; Varini M., Medical Oncology Dept., Clinica Sant'Anna, 6900 Lugano, Switzerland; Wytenbach R., Radiology Dept., Ospedale Regionale Bellinzona e Valli, 6500 Bellinzona, Switzerland.*



**FUNDING**

This work was supported by Krebsforschung Schweiz, grant number KFS – 02668-08-2010, and by Advisory Board Research Ente Ospedaliero Cantonale Bellinzona, grant number ABREOC 10/2010.

The funding sources have not any involvement in the study design, in the collection, analysis and interpretation of data, in the writing of the report and in the decision to submit the paper for publication.

**COMPETING INTERESTS**

The Authors have no competing interests.

**DATA SHARING**

no additional data available.

**AUTHORS' CONTRIBUTION**

I declare that V. Bianchi, A. Bordoni, A. Spitale and L. Mazzucchelli have directly participated in the planning of the manuscript; that V. Bianchi, A. Bordoni, A. Spitale and the QC<sub>3</sub> Colorectal Working Group have directly participated in the conducting of the project; that V. Bianchi, A. Bordoni, A. Spitale and L. Ortelli have directly participated in the reporting, acquisition of data or analysis and interpretation of data; and that V. Bianchi and A. Bordoni are responsible for the overall content as guarantors of the work. Finally, I declare that all the Authors have drafted and revised the paper critically for important intellectual content, and that they have given final approval of the version published. None of the Authors have competing interests.

## ACKNOWLEDGEMENTS

We are particularly grateful to the QC<sub>3</sub> CRC AB Members, who contribute to critically review the QC<sub>3</sub> CRC QI, for their precious collaboration:

*Prof. Franco Cavalli, Scientific Director, Oncologic Institute of Italian Switzerland (IOSI), Bellinzona, Switzerland; Prof. Gian Dorta, Director, Digestive Endoscopy Dept., Centre Hospitalier Universitaire Vaudois (CHUV), Lausanne, Switzerland; Prof. Jean Faivre, Director, Registre Bourguignon des Cancers Digestifs, Dijon Cedex, France; Prof. Stefano Fanti, Director, PET Center, Policlinico S. Orsola-Malpighi, Bologna, Italy; Prof. Roberto Labianca, Director, Oncology and Haematology Dept., Ospedali Riuniti, Bergamo, Italy; Prof. Sebastiano Martinoli, Director, General Surgery Dept., Clinica Luganese, Lugano, Switzerland; Prof. Philip Quirke, Director, Leeds Institute of Molecular Medicine (LIMM), Section of Pathology, Wellcome Trust Brenner Building, St James's University Hospital, Leeds, United Kingdom; Prof. Emmanuel Tiret, Chef Pôle Digestif des Hôpitaux Univesitaires Paris Est, Chef Service de Chirurgie Générale et Digestive, Hôpital Saint-Antoine, Paris, France; Prof. Vincenzo Valentini, Director, Unità Operativa Complessa Radioterapia I, Policlinico Universitario Agostino Gemelli, Rome, Italy; Prof. Dominik Weishaupt, Director, Radiology Dept., Stadtspital Triemli, Zürich, Switzerland.*

**COPYRIGHT**

The Corresponding Author has the right to grant on behalf of all Authors and does grant on behalf of all Authors, an exclusive licence on a worldwide basis to the BMJ Publishing Group Ltd, and its Licensees to permit this article (if accepted) to be published in BMJ Open and any other BMJPG products to exploit all subsidiary rights, as set out in your licence and the Corresponding Author accepts and understands that any supply made under these terms is made by BMJPG to the Corresponding Author.

For peer review only

1  
2  
3  
4  
5  
6  
7  
8  
9  
10  
11  
12  
13  
14  
15  
16  
17  
18  
19  
20  
21  
22  
23  
24  
25  
26  
27  
28  
29  
30  
31  
32  
33  
34  
35  
36  
37  
38  
39  
40  
41  
42  
43  
44  
45  
46  
47  
48  
49  
50  
51  
52  
53  
54  
55  
56  
57  
58  
59  
60

**LEGENDS TO FIGURES**

**FIGURE 1** - Process used to select quality indicators for colorectal cancer care

QI = Quality Indicators; QC<sub>3</sub> CRC-WG = QC3 Colorectal Cancer Working Group; AB = Advisory Board

For peer review only

**Table 1. Quality indicators of colorectal cancer care according to diagnostic-therapeutic process (diagnosis, pathology, treatment - surgery, chemotherapy and radiotherapy - and outcome) and tumour site.**

| CLINICAL DOMAIN    | SITE                                                                                                                                                                    | QUALITY INDICATOR                                                                                                                                                                                | NUMERATOR                                                                                                                                                                                                                                                                                                                                   | DENOMINATOR                                                                                | MEDICAL DOCUMENTATION                                                                                                                                                                                                     | RATIONALE                                                                                                          | REF             |
|--------------------|-------------------------------------------------------------------------------------------------------------------------------------------------------------------------|--------------------------------------------------------------------------------------------------------------------------------------------------------------------------------------------------|---------------------------------------------------------------------------------------------------------------------------------------------------------------------------------------------------------------------------------------------------------------------------------------------------------------------------------------------|--------------------------------------------------------------------------------------------|---------------------------------------------------------------------------------------------------------------------------------------------------------------------------------------------------------------------------|--------------------------------------------------------------------------------------------------------------------|-----------------|
| DIAGNOSIS<br>(n=6) | C&R                                                                                                                                                                     | Proportion of patients with colorectal cancer and diagnosis based on symptoms vs screening vs accidental finding                                                                                 | Number of patients with colorectal cancer whose diagnosis is based on symptoms, defined as appearance or persistence of clinical events and signs, such as rectal bleeding, occult blood in stool, weight loss with no apparent cause, general abdominal discomfort, bowel obstruction, change in bowel habits, constant tiredness, anaemia | Number of patients with colorectal cancer                                                  | Request form of endoscopic examination<br>Endoscopy and surgical pathology reports<br>Reports/discharge letters coming from all hospital units/department (i.e. surgery, medicine, radiation oncology, medical oncology ) | Assessment of the patient's take charge                                                                            | [18 34-38]      |
|                    |                                                                                                                                                                         | Number of patients with colorectal cancer whose diagnosis is based on screening, defined as regular examination, such as faecal occult blood test (FOBT) or colonoscopy in asymptomatic patients |                                                                                                                                                                                                                                                                                                                                             |                                                                                            |                                                                                                                                                                                                                           |                                                                                                                    |                 |
|                    |                                                                                                                                                                         | Number of patients with colorectal cancer whose diagnosis is an accidental finding following examinations or therapies for other diseases (e.g. hospital admission for other causes...)          |                                                                                                                                                                                                                                                                                                                                             |                                                                                            |                                                                                                                                                                                                                           |                                                                                                                    |                 |
|                    | C&R                                                                                                                                                                     | Proportion of patients with colorectal cancer, evaluated by preoperative colonoscopy                                                                                                             | Number of patients with colorectal cancer who have been evaluated by a preoperative colonoscopy                                                                                                                                                                                                                                             | Number of patients with colorectal cancer undergoing surgery                               | Endoscopy report<br>Request form of pathology examination<br>Pathology report of endoscopy                                                                                                                                | Planning of further diagnostic procedures and treatments<br>Comprehensiveness of diagnostic and staging evaluation | [7 16 18 40-41] |
| R                  | Proportion of patients with rectal cancer and description of the tumour localization (distance <i>ab ano</i> ) in the endoscopic/pathologic documentation               | Number of patients with rectal cancer who have the description of the tumour localization, in terms of distance <i>ab ano</i> , in the endoscopic/pathologic documentation                       | Number of patients with rectal cancer undergoing endoscopy                                                                                                                                                                                                                                                                                  | Endoscopy report<br>Request form of pathology examination<br>Pathology report of endoscopy | Planning of further diagnostic procedures and treatments<br>Comprehensiveness of diagnostic and staging evaluation                                                                                                        | [1 19 56-57]                                                                                                       |                 |
| C&R                | Proportion of patients with colorectal cancer and requests for an initial CT and/or a MRI examination completed by clinical information according to the ACR guidelines | Number of patients with colorectal cancer for which the request of an initial CT and/or a MRI examination is completed by clinical information according to the ACR guidelines                   | Number of patients with colorectal cancer undergoing initial CT and/or MRI examination                                                                                                                                                                                                                                                      | Radiology (CT and/or MRI examination) report                                               | Providing the necessary information for a comprehensive radiological examination<br><br>Assessment of the quality of the flux of clinical information                                                                     | [7 58]                                                                                                             |                 |

|                    |     |                                                                                                                                                                                                                                                                                                                                                                                                                                                    |                                                                                                                                                                                                                                                                                                                                                                                                                                                                                                                                                                                      |                                                                                               |                                                                                                                                                                   |                                                                                                                                                     |                    |
|--------------------|-----|----------------------------------------------------------------------------------------------------------------------------------------------------------------------------------------------------------------------------------------------------------------------------------------------------------------------------------------------------------------------------------------------------------------------------------------------------|--------------------------------------------------------------------------------------------------------------------------------------------------------------------------------------------------------------------------------------------------------------------------------------------------------------------------------------------------------------------------------------------------------------------------------------------------------------------------------------------------------------------------------------------------------------------------------------|-----------------------------------------------------------------------------------------------|-------------------------------------------------------------------------------------------------------------------------------------------------------------------|-----------------------------------------------------------------------------------------------------------------------------------------------------|--------------------|
|                    | R   | Proportion of patients with low rectal <sup>a</sup> cancer undergoing pelvic MRI of staging                                                                                                                                                                                                                                                                                                                                                        | Number of patients with low rectal <sup>a</sup> cancer who have undergone a pelvic MRI of staging                                                                                                                                                                                                                                                                                                                                                                                                                                                                                    | Number of patients with low rectal cancer                                                     | Radiology (MRI examination) report<br>Discharge letters coming from all hospital units/department (i.e. surgery, medicine, medical oncology, radiation oncology ) | Planning of further diagnostic procedures and treatments<br>Comprehensiveness of diagnostic and staging evaluation                                  | [19-59-61]         |
|                    | R   | Proportion of patients with rectal cancer and a preoperative MRI reporting the description of the radial margin status (mm)                                                                                                                                                                                                                                                                                                                        | Number of patients with rectal cancer who have undergone a preoperative MRI reporting the description of the radial margin status (mm)                                                                                                                                                                                                                                                                                                                                                                                                                                               | Number of patients with rectal cancer undergoing preoperative MRI                             | Radiology (MRI examination) report                                                                                                                                | Planning of further diagnostic procedures and treatments<br>Comprehensiveness of diagnostic and staging evaluation                                  | [62]               |
| PATHOLOGY<br>(n=3) | R   | Proportion of patients with rectal cancer for which the request for the pathological examination includes the information of neo-adjuvant RT±ChT                                                                                                                                                                                                                                                                                                   | Number of patients with rectal cancer for which the request for the pathological examination includes the information of neo-adjuvant RT±ChT                                                                                                                                                                                                                                                                                                                                                                                                                                         | Number of patients with rectal cancer undergoing neo-adjuvant RT±ChT and surgery <sup>a</sup> | Request form of pathology examination<br>Surgical pathology report                                                                                                | Providing the necessary information for a comprehensive pathological examination<br>Assessment of the quality of the flux of clinical information   | Proposed by CRC-WG |
|                    | C&R | Proportion of patients with colorectal cancer and a sufficient number of tumour samples (≥3)                                                                                                                                                                                                                                                                                                                                                       | Number of patients with colorectal cancer for which 3 or more tumour sample were processed for the pathological analysis                                                                                                                                                                                                                                                                                                                                                                                                                                                             | Number of patients with colorectal cancer undergoing surgery <sup>a</sup>                     | Surgical pathology report                                                                                                                                         | Comprehensiveness of pathology examination                                                                                                          | Proposed by CRC-WG |
|                    | C&R | Proportion of patients with colorectal cancer and a surgical pathology report including the following characteristics:<br>- surgical intervention description<br>- sample length<br>- tumour localization according to WHO<br>- tumour size<br>- histological type according to WHO<br>- histological grade<br>- resection margins<br>- lymph-vascular invasion<br>- perineural invasion<br>- tumour deposits (discontinuous extramural extension) | Number of patients with colorectal cancer whose pathological report includes the following characteristics:<br>- surgical intervention description<br>- sample length<br>- tumour localization according to WHO<br>- tumour size<br>- histological type according to WHO<br>- histological grade<br>- resection margins<br>- lymph-vascular invasion<br>- perineural invasion<br>- tumour deposits (discontinuous extramural extension)<br>- pathological staging (AJCC pTNM)<br>- number of retrieved lymph nodes<br>- treatment effect<br>-macroscopic integrity of the mesorectum | Number of patients with colorectal cancer undergoing surgery <sup>a</sup>                     | Surgical pathology report                                                                                                                                         | Comprehensiveness and standardisation of surgical pathology report<br><br>Comprehensiveness of staging evaluation<br>Planning of further treatments | [18-19-63-64]      |

|                     |     |                                                                                                                                                                                                                                        |                                                                                                                                                                               |                                                                                                         |                                                                                                                                                                      |                                                                           |                        |
|---------------------|-----|----------------------------------------------------------------------------------------------------------------------------------------------------------------------------------------------------------------------------------------|-------------------------------------------------------------------------------------------------------------------------------------------------------------------------------|---------------------------------------------------------------------------------------------------------|----------------------------------------------------------------------------------------------------------------------------------------------------------------------|---------------------------------------------------------------------------|------------------------|
|                     |     | - pathological staging (AJCC pTNM)<br>- number of retrieved lymph nodes<br>- treatment effect<br>-macroscopic integrity of the mesorectum (for rectum only)<br><br>(this quality indicator should be provided for each characteristic) | (for rectum only)                                                                                                                                                             |                                                                                                         |                                                                                                                                                                      |                                                                           |                        |
| TREATMENT<br>(n=16) | C&R | Proportion of patients with colorectal cancer operated in emergency <sup>b</sup>                                                                                                                                                       | Number of patients with colorectal cancer who have been operated in emergency <sup>b</sup>                                                                                    | Number of patients with colorectal cancer undergoing surgery <sup>a</sup>                               | Radiology and surgery report/discharge letter<br>Surgical pathology report                                                                                           | Assessment of the patient's take charge                                   | [65-67]                |
|                     | C&R | Proportion of patients with colorectal cancer and dead within 30 days and 6 months from the surgery (postoperative mortality)                                                                                                          | Number of patients with colorectal cancer and dead within 30 days from the surgery<br><br>Number of patients with colorectal cancer and dead within 6 months from the surgery | Number of patients with colorectal cancer undergoing surgery <sup>a</sup>                               | Surgery report/discharge letter<br>Surgical pathology report<br>Access to regional Office of Population Registry Rosters for the assessment of patients vital status | Assessment of the quality of surgical procedure                           | [68-71]                |
|                     | C&R | Proportion of patients with colorectal cancer and postoperative multidisciplinary discussion                                                                                                                                           | Number of patients with colorectal cancer for which there have been a multidisciplinary discussion after surgery                                                              | Number of patients with colorectal cancer undergoing surgery <sup>a</sup>                               | Surgery, Oncology, Radiation Oncology reports/discharge letters<br>Multidisciplinary discussion documentation                                                        | Planning of further diagnostic procedures and treatments                  | [72-73]                |
|                     | R   | Proportion of patients with malignant rectal polyp (pT1) and complete endoscopic polypectomy                                                                                                                                           | Number of patients with malignant rectal polyp (pT1) who have undergone a complete endoscopic polypectomy                                                                     | Number of patients with malignant rectal polyp (pT1)                                                    | Endoscopy report, Endoscopic pathology reports                                                                                                                       | Assessment of the quality of surgical procedure                           | Proposed by the CRC-WG |
|                     | R   | Proportion of patients with low rectal <sup>c</sup> cancer and surgical intervention with sphincter preservation                                                                                                                       | Number of patients with low rectal <sup>c</sup> cancer who have undergone a surgical intervention with sphincter preservation                                                 | Number of patients with low rectal cancer undergoing surgery <sup>a</sup>                               | Surgical pathology report<br>Surgery report/discharge letter                                                                                                         | Assessment of the quality of surgical procedure                           | [74-76]                |
|                     | R   | Proportion of patients with rectal cancer undergoing TEM with R0 resection                                                                                                                                                             | Number of patients with rectal cancer who had undergone TEM with R0 resection                                                                                                 | Number of patients with rectal cancer undergoing TEM                                                    | Surgical pathology report<br>Surgery report/discharge letter                                                                                                         | Assessment of the quality of surgical procedure                           | [77-79]                |
|                     | C&R | Proportion of patients with colorectal cancer and a number of resected lymph nodes $\geq 12$                                                                                                                                           | Number of patients with colorectal cancer with a number of resected lymph nodes $\geq 12$                                                                                     | Number of patients with colorectal cancer undergoing surgery <sup>a</sup> , but no neo-adjuvant therapy | Surgical pathology report<br>Surgery report/discharge letter                                                                                                         | Assessment of the quality of surgical procedure and pathology examination | [74 16 40-41 80-85]    |
|                     | C&R | Proportion of patients with colorectal cancer operated on with free margins                                                                                                                                                            | Number of patients with colon cancer who have undergone surgery and have free margins                                                                                         | Number of patients with colorectal cancer undergoing surgery <sup>a</sup>                               | Surgical pathology report<br>Surgery report/discharge                                                                                                                | Assessment of the quality of surgical procedure                           | [786-87]               |

|     |                                                                                                                                                                                                                                                                             |                                                                                                                                                                                                                                                                                  |                                                                                                                              |                                                                                                              |                                                                      |                     |
|-----|-----------------------------------------------------------------------------------------------------------------------------------------------------------------------------------------------------------------------------------------------------------------------------|----------------------------------------------------------------------------------------------------------------------------------------------------------------------------------------------------------------------------------------------------------------------------------|------------------------------------------------------------------------------------------------------------------------------|--------------------------------------------------------------------------------------------------------------|----------------------------------------------------------------------|---------------------|
|     |                                                                                                                                                                                                                                                                             |                                                                                                                                                                                                                                                                                  |                                                                                                                              | letter                                                                                                       |                                                                      |                     |
| C&R | Proportion of patients with colorectal cancer and AJCC TNM clinical stage I (from T2N0M0) to III (any T, N1M0) undergoing a surgical resection with anastomosis                                                                                                             | Number of patients with colon cancer and AJCC TNM clinical stage I (from T2N0M0) to III (any T, N1M0) who have undergone a surgical resection with anastomosis                                                                                                                   | Number of patients with colorectal cancer and AJCC TNM stage I (from T2N0M0) to III                                          | Radiology report<br>Surgical pathology report<br>Surgery report/discharge letter                             | Assessment of the quality of surgical procedure                      | [40-41 86-87]       |
| C   | Proportion of patients with colon cancer and AJCC TNM stage II (T3N0M0, T4N0M0) high-risk (presence of at least one of the following factors: LN<12, G3, lymph-vascular or perineural invasion, tumour obstruction, tumour perforation, pT4) or III undergoing adjuvant ChT | Number of patients with colon cancer and AJCC TNM stage II (T3N0M0, T4N0M0) high-risk (presence of at least one of the following factors: LN<12, G3, lymph-vascular or perineural invasion, tumour obstruction, tumour perforation, pT4) or III, who have undergone adjuvant ChT | Number of patients with colon cancer and AJCC TNM stage II high-risk or III, undergoing surgery <sup>a</sup>                 | Radiology report<br>Surgical pathology report<br>Surgery, oncology reports/discharge letters                 | Assessment of the quality of oncologic treatment                     | [16 18 40-41 88-91] |
| C   | Proportion of patients with colon cancer AJCC TNM stage II high-risk or stage III undergoing adjuvant ChT within 8 weeks from surgical resection                                                                                                                            | Number of patients with colon cancer and AJCC TNM stage II high-risk or III, who have undergone adjuvant ChT within 8 weeks from surgical resection                                                                                                                              | Number of patients with colon cancer and AJCC TNM stage II high-risk or III undergoing surgery <sup>a</sup> and adjuvant ChT | Radiology report<br>Surgical pathology report<br>Surgery, oncology reports/discharge letters                 | Assessment of the quality of oncologic treatment                     | [18 92]             |
| C&R | Proportion of patients with colorectal cancer and histology of the primary tumour or metastases obtained before the beginning of ChT                                                                                                                                        | Number of patients with colorectal cancer and histology of the primary tumour or metastases obtained before the beginning of ChT                                                                                                                                                 | Number of patients with colorectal cancer undergoing primary ChT                                                             | Radiology and pathology reports<br>Oncology report/discharge letter                                          | Assessment of the quality of oncologic treatment                     | [40-41]             |
| C&R | Proportion of patients with colorectal cancer and unresectable metastases undergoing first-line ChT or bio-ChT                                                                                                                                                              | Number of patients with colorectal cancer and unresectable metastases who have undergone a first-line ChT or bio-ChT                                                                                                                                                             | Number of patients with colorectal cancer and unresectable metastases                                                        | Radiology and pathology reports<br>Oncology report/discharge letter                                          | Assessment of the quality of oncologic treatment                     | [93-96]             |
| C&R | Proportion of patients with colorectal cancer and hepatic metastases primarily unresectable turned into resectable metastases after neo-adjuvant ChT                                                                                                                        | Number of patients with colorectal cancer and hepatic metastases primarily unresectable turned into resectable metastases after neo-adjuvant ChT                                                                                                                                 | Number of patients with colorectal cancer and unresectable hepatic metastases undergoing neo-adjuvant ChT                    | Radiology report<br>Oncology report/discharge letter                                                         | Assessment of the quality of oncologic treatment                     | [96]                |
| R   | Proportion of patients with locally advanced rectal cancer (T3-4 and/or any T, N+ and M0) undergoing neo-adjuvant RT±ChT                                                                                                                                                    | Proportion of patients with locally advanced rectal cancer (T3-4 and/or any T, N+ and M0) who have undergone neo-adjuvant RT±ChT                                                                                                                                                 | Number of patients with locally advanced rectal cancer undergoing surgery <sup>a</sup>                                       | Endoscopic pathology report<br>Radiology report<br>Radiation Oncology and oncology reports/discharge letters | Assessment of the quality of oncologic and radio-oncologic treatment | [97-98]             |
| R   | Proportion of patients with                                                                                                                                                                                                                                                 | Number of patients with rectal cancer who                                                                                                                                                                                                                                        | Number of patients with rectal                                                                                               | Endoscopic pathology                                                                                         | Assessment of the quality                                            | [18 98]             |



|                  |     |                                                                                                                 |                                                                                                                    |                                                                        |                                                                                                                        |                                            |        |
|------------------|-----|-----------------------------------------------------------------------------------------------------------------|--------------------------------------------------------------------------------------------------------------------|------------------------------------------------------------------------|------------------------------------------------------------------------------------------------------------------------|--------------------------------------------|--------|
|                  |     | rectal cancer and undergoing neo-adjuvant RT±ChT operated within 6-8 weeks after the end of neo-adjuvant RT±ChT | have undergone neo-adjuvant RT±ChT and were operated within 6-8 weeks after the end of neo-adjuvant RT±ChT         | cancer undergoing neo-adjuvant RT±ChT followed by surgery <sup>a</sup> | report<br>Radiology report<br>Radiation Oncology and oncology reports/discharge letters<br>Surgical pathology report   | of oncologic and radio-oncologic treatment |        |
| OUTCOME<br>(n=2) | C&R | Analysis of overall survival at 1, 3, 5 and 10 years from diagnosis                                             | Number of patients with colorectal cancer who survive at 1, 3, 5 and 10 years from diagnosis                       | Number of patients with colorectal cancer                              | Access to regional Office of Population Registry Rosters for the assessment of patients vital status                   | Assessment of overall survival             | [7 99] |
|                  | C&R | Analysis of disease-free survival at 1, 3, 5 and 10 years from the curative treatment                           | Number of patients with colorectal cancer who are disease-free at 1, 3, 5 and 10 years from the curative treatment | Number of patients with colorectal cancer curatively treated           | Reports/discharge letters coming from all hospital units/department (i.e. surgery, medicine, oncology, radio-oncology) | Assessment of disease-free survival        | [7 99] |

**Abbreviation:**

**C&R**= colon-rectum; **C**= colon; **R**= rectum; **FOBT**= Faecal Occult Blood Test; **ACR**= American College of Radiology; **CT**= computed tomography; **MRI**= magnetic resonance imaging; **AJCC**= American Joint Committee on Cancer; **RT**= radiotherapy; **ChT**= chemotherapy; **WHO**= World Health Organization; **TEM**= transanal endoscopic microsurgery.

<sup>a</sup> surgery excludes endoscopic resection and colostomy

<sup>b</sup> emergency: within 24 hours from the onset of symptoms;

<sup>c</sup> low rectum: 4 to 7.5 cm from the dentate line [100]

## REFERENCE LIST

1. Malin JL, Schneider EC, Epstein AM, et al. Results of the National Initiative for Cancer Care Quality: how can we improve the quality of cancer care in the United States? *J Clin Oncol* 2006;**24**(4):626-34 doi: JCO.2005.03.3365 [pii]  
10.1200/JCO.2005.03.3365[published Online First: Epub Date]].
2. Schneider EC, Malin JL, Kahn KL, et al. Developing a system to assess the quality of cancer care: ASCO's national initiative on cancer care quality. *J Clin Oncol* 2004;**22**(15):2985-91 doi: 10.1200/JCO.2004.09.087  
22/15/2985 [pii][published Online First: Epub Date]].
3. Campbell SM, Roland MO, Buetow SA. Defining quality of care. *Soc Sci Med* 2000;**51**(11):1611-25 doi: S0277953600000575 [pii][published Online First: Epub Date]].
4. Neuss MN, Desch CE, McNiff KK, et al. A process for measuring the quality of cancer care: the Quality Oncology Practice Initiative. *J Clin Oncol* 2005;**23**(25):6233-9 doi: JCO.2005.05.948 [pii]  
10.1200/JCO.2005.05.948[published Online First: Epub Date]].
5. Duvalko KM, Sherar M, Sawka C. Creating a system for performance improvement in cancer care: Cancer Care Ontario's clinical governance framework. *Cancer Control* 2009;**16**(4):293-302
6. Mainz J, Hansen AM, Palshof T, et al. National quality measurement using clinical indicators: the Danish National Indicator Project. *J Surg Oncol* 2009;**99**(8):500-4 doi: 10.1002/jso.21192[published Online First: Epub Date]].
7. Gagliardi AR, Simunovic M, Langer B, et al. Development of quality indicators for colorectal cancer surgery, using a 3-step modified Delphi approach. *Can J Surg* 2005;**48**(6):441-52
8. Peppercorn JM, Weeks JC, Cook EF, et al. Comparison of outcomes in cancer patients treated within and outside clinical trials: conceptual framework and structured review. *Lancet* 2004;**363**(9405):263-70 doi: S0140-6736(03)15383-4 [pii]  
10.1016/S0140-6736(03)15383-4[published Online First: Epub Date]].
9. Ferlay J, Parkin DM, Steliarova-Foucher E. Estimates of cancer incidence and mortality in Europe in 2008. *Eur J Cancer* 2010;**46**(4):765-81 doi: S0959-8049(09)00926-5 [pii]  
10.1016/j.ejca.2009.12.014[published Online First: Epub Date]].
10. NICER. Secondary 2012. <http://www.nicer.org>.
11. Bordoni A, Lorez M, Bouchardy C, et al. Trends in colorectal cancer survival in Switzerland. *Bulletin Suisse du Cancer* 2012;**1/2012**:51-54
12. Bouchardy C, Lutz JM, Kühni C, et al. *I tumori in Svizzera. Situazione e sviluppi dal 1983 al 2007*. Neuchâtel: Ufficio Federale di Statistica (UFS), 2011.
13. Sant M, Allemani C, Santaquilani M, et al. EURO CARE-4. Survival of cancer patients diagnosed in 1995-1999. Results and commentary. *Eur J Cancer* 2009;**45**(6):931-91 doi: S0959-8049(08)00926-X [pii]  
10.1016/j.ejca.2008.11.018[published Online First: Epub Date]].
14. Desch CE, Benson AB, 3rd, Somerfield MR, et al. Colorectal cancer surveillance: 2005 update of an American Society of Clinical Oncology practice guideline. *J Clin Oncol* 2005;**23**(33):8512-9 doi: JCO.2005.04.0063 [pii]  
10.1200/JCO.2005.04.0063[published Online First: Epub Date]].
15. Desch CE, McNiff KK, Schneider EC, et al. American Society of Clinical Oncology/National Comprehensive Cancer Network Quality Measures. *J Clin Oncol* 2008;**26**(21):3631-7 doi: 26/21/3631 [pii]  
10.1200/JCO.2008.16.5068[published Online First: Epub Date]].
16. QOPI. Summary of the measures. Spring 2011. Secondary Summary of the measures. Spring 2011. 2011. <http://qopi.asco.org/Methodology>.

17. Jacobsen PB, Shibata D, Siegel EM, et al. Measuring quality of care in the treatment of colorectal cancer: the moffitt quality practice initiative. *J Oncol Pract* 2007;**3**(2):60-5 doi: 10.1200/JOP.0722002[published Online First: Epub Date].
18. Malafa MP, Corman MM, Shibata D, et al. The Florida Initiative for Quality Cancer Care: a regional project to measure and improve cancer care. *Cancer Control* 2009;**16**(4):318-27
19. McGory ML, Shekelle PG, Ko CY. Development of quality indicators for patients undergoing colorectal cancer surgery. *J Natl Cancer Inst* 2006;**98**(22):1623-33 doi: 98/22/1623 [pii] 10.1093/jnci/djj438[published Online First: Epub Date].
20. Siegel EM, Jacobsen PB, Malafa M, et al. Evaluating the quality of colorectal cancer care in the state of Florida: results from the Florida Initiative for Quality Cancer Care. *J Oncol Pract* 2012;**8**(4):239-45 doi: 10.1200/JOP.2011.000477 3774677 [pii][published Online First: Epub Date].
21. Donabedian A. Evaluating the quality of medical care. *Milbank Q* 1966;**83**:691-729
22. Fink A, Kosecoff J, Chassin M, et al. Consensus methods: characteristics and guidelines for use. *Am J Public Health* 1984;**74**(9):979-83
23. Jones J, Hunter D. Consensus methods for medical and health services research. *BMJ* 1995;**311**(7001):376-80
24. Brook RH. The Rand/UCLA appropriateness method. In: McCormic KA, Moore SR, Siegel RA, eds. *Clinical practice guideline development: methodology perspectives*. Rockville, Md: Agency for Health Care Policy and Research, 1994:59-70.
25. Krzyzanowska MK, Barbera L, Elit L, et al. Identifying population-level indicators to measure the quality of cancer care for women. *Int J Qual Health Care* 2011;**23**(5):554-64 doi: mzz043 [pii] 10.1093/intqhc/mzz043[published Online First: Epub Date].
26. Blind K, Cuhls K, Grupp H. Personal attitudes in the assessment of the future of science and technology: a factor analysis approach. *Technological forecasting and social change*, 2001:131-49.
27. Leape LL, Park RE, Kahan JP, et al. Group judgments of appropriateness: the effect of panel composition. *Qual Assur Health Care* 1992;**4**(2):151-9
28. Campbell SM, Hann M, Roland MO, et al. The effect of panel membership and feedback on ratings in a two-round Delphi survey: results of a randomized controlled trial. *Med Care* 1999;**37**(9):964-8
29. Coulter I, Adams A, Shekelle P. Impact of varying panel membership on ratings of appropriateness in consensus panels: a comparison of a multi- and single disciplinary panel. *Health Serv Res* 1995;**30**(4):577-91
30. Wollersheim H, Hermens R, Hulscher M, et al. Clinical indicators: development and applications. *Neth J Med* 2007;**65**(1):15-22
31. Mainz J. Defining and classifying clinical indicators for quality improvement. *Int J Qual Health Care* 2003;**15**(6):523-30
32. Mainz J. Developing evidence-based clinical indicators: a state of the art methods primer. *Int J Qual Health Care* 2003;**15** Suppl 1:i5-11
33. Rubin HR, Pronovost P, Diette GB. From a process of care to a measure: the development and testing of a quality indicator. *Int J Qual Health Care* 2001;**13**(6):489-96
34. Wilkins T, Reynolds PL. Colorectal cancer: a summary of the evidence for screening and prevention. *Am Fam Physician* 2008;**78**(12):1385-92
35. Sikka V, Ornato JP. Cancer diagnosis and outcomes in Michigan EDs vs other settings. *Am J Emerg Med* 2011 doi: S0735-6757(10)00574-7 [pii] 10.1016/j.ajem.2010.11.029[published Online First: Epub Date].
36. Levin B, Lieberman DA, McFarland B, et al. Screening and surveillance for the early detection of colorectal cancer and adenomatous polyps, 2008: a joint guideline from the American Cancer Society, the US Multi-Society Task Force on Colorectal Cancer, and the American

- 1  
2  
3 College of Radiology. *Gastroenterology* 2008;**134**(5):1570-95 doi: S0016-5085(08)00232-1  
4 [pii]  
5 10.1053/j.gastro.2008.02.002[published Online First: Epub Date].  
6 37. Winawer S, Fletcher R, Rex D, et al. Colorectal cancer screening and surveillance: clinical  
7 guidelines and rationale-Update based on new evidence. *Gastroenterology* 2003;**124**(2):544-  
8 60 doi: 10.1053/gast.2003.50044  
9 S0016508502158951 [pii][published Online First: Epub Date].  
10 38. Majumdar SR, Fletcher RH, Evans AT. How does colorectal cancer present? Symptoms,  
11 duration, and clues to location. *Am J Gastroenterol* 1999;**94**(10):3039-45 doi:  
12 S0002927099005109 [pii]  
13 10.1111/j.1572-0241.1999.01454.x[published Online First: Epub Date].  
14 39. Schoen RE, Pinsky PF, Weissfeld JL, et al. Colorectal-cancer incidence and mortality with  
15 screening flexible sigmoidoscopy. *N Engl J Med* 2012;**366**(25):2345-57 doi:  
16 10.1056/NEJMoa1114635[published Online First: Epub Date].  
17 40. Labianca R, Nordlinger B, Beretta GD, et al. Primary colon cancer: ESMO Clinical Practice  
18 Guidelines for diagnosis, adjuvant treatment and follow-up. *Ann Oncol* 2010;**21**(suppl.  
19 5):v70-v77  
20 41. NCCN. Colon Cancer. 2.2011 ed: NCCN, 2011.  
21 42. Pfister DG, Benson AB, 3rd, Somerfield MR. Clinical practice. Surveillance strategies after  
22 curative treatment of colorectal cancer. *N Engl J Med* 2004;**350**(23):2375-82 doi:  
23 10.1056/NEJMcp010529  
24 350/23/2375 [pii][published Online First: Epub Date].  
25 43. Li Destri G, Di Cataldo A, Puleo S. Colorectal cancer follow-up: useful or useless? *Surg Oncol*  
26 2006;**15**(1):1-12 doi: S0960-7404(06)00025-9 [pii]  
27 10.1016/j.suronc.2006.06.001[published Online First: Epub Date].  
28 44. Campbell SM, Braspenning J, Hutchinson A, et al. Research methods used in developing and  
29 applying quality indicators in primary care. *Qual Saf Health Care* 2002;**11**(4):358-64  
30 45. Ayanian JZ, Landrum MB, Normand SL, et al. Rating the appropriateness of coronary  
31 angiography--do practicing physicians agree with an expert panel and with each other? *N Engl*  
32 *J Med* 1998;**338**(26):1896-904 doi: 10.1056/NEJM199806253382608[published Online First:  
33 Epub Date].  
34 46. Sackett DL, Starus SE, Richardson WS, et al. *Evidence-Based Medicine: How to Practice and*  
35 *Teach*. 2nd ed. London: Churchill Livingstone, 2000.  
36 47. Qualità delle cure contro il cancro (QC3) nel territorio della Svizzera Italiana. Risultatai  
37 preliminari dei tumori colorettali incidenti nel 2011. XXXVII GRELL Annual Meeting; May  
38 16-18, 2012 16-18 May 2012; Porto, Portugal.  
39 48. QoCC Study: indicators of quality of cancer care in Southern Switzerland. 33rd IACR Annual  
40 Meeting; October 11-13, 2011; Balaclava, Mauritius.  
41 49. Bordoni A, Spitale A, Mazzucchelli L, et al. *QC3: quality of comprehensive cancer care in*  
42 *Southern Switzerland. 34th IACR Annual Meeting*. Cork, Ireland: IACR, 2012, 17-19  
43 September.  
44 50. Bordoni A, Spitale A, Mazzucchelli L, et al. *Defining evidence-based clinical oncologic cares*  
45 *quality indicators. ENCR Scientific Meeting*. Cork, Ireland: ENCR, 2012, 19-20 September.  
46 51. Bouchardy C, Rapiti E, Blagojevic S, et al. Older female cancer patients: importance, causes,  
47 and consequences of undertreatment. *J Clin Oncol* 2007;**25**(14):1858-69 doi: 25/14/1858 [pii]  
48 10.1200/JCO.2006.10.4208[published Online First: Epub Date].  
49 52. Bouchardy C, Rapiti E, Fioretta G, et al. Undertreatment strongly decreases prognosis of breast  
50 cancer in elderly women. *J Clin Oncol* 2003;**21**(19):3580-7 doi: 10.1200/JCO.2003.02.046  
51 JCO.2003.02.046 [pii][published Online First: Epub Date].  
52 53. van Gijn W, van de Velde CJ. 2010 SSO John Wayne clinical research lecture: rectal cancer  
53 outcome improvements in Europe: population-based outcome registrations will conquer the  
54  
55  
56  
57  
58  
59  
60

- world. *Ann Surg Oncol* 2011;**18**(3):691-6 doi: 10.1245/s10434-010-1326-3[published Online First: Epub Date].
54. van Gijn W, van de Velde CJ. Improving quality of cancer care through surgical audit. *Eur J Surg Oncol* 2010;**36 Suppl 1**:S23-6 doi: S0748-7983(10)00202-7 [pii] 10.1016/j.ejso.2010.06.026[published Online First: Epub Date].
55. Characteristics of clinical indicators. *QRB Qual Rev Bull* 1989;**15**(11):330-9
56. Smith N, Brown G. Preoperative staging of rectal cancer. *Acta Oncol* 2008;**47**(1):20-31 doi: 783360368 [pii] 10.1080/02841860701697720[published Online First: Epub Date].
57. Schneider PM, Vallbohmer D, Ploenes Y, et al. Evaluation of quality indicators following implementation of total mesorectal excision in primarily resected rectal cancer changed future management. *Int J Colorectal Dis* 2011;**26**(7):903-9 doi: 10.1007/s00384-011-1155-2[published Online First: Epub Date].
58. ACR. Practice Guidelines and Technical Standards. Secondary Practice Guidelines and Technical Standards 2011. <http://www.acr.org/guidelines>.
59. Taylor FG, Quirke P, Heald RJ, et al. Preoperative High-resolution Magnetic Resonance Imaging Can Identify Good Prognosis Stage I, II, and III Rectal Cancer Best Managed by Surgery Alone: A Prospective, Multicenter, European Study That Recruited Consecutive Patients With Rectal Cancer. *Ann Surg* 2011 doi: 10.1097/SLA.0b013e31820b8d52[published Online First: Epub Date].
60. Beets-Tan RG, Beets GL. Local staging of rectal cancer: A review of imaging. *J Magn Reson Imaging* 2011;**33**(5):1012-9 doi: 10.1002/jmri.22475[published Online First: Epub Date].
61. Bellows CF, Jaffe B, Bacigalupo L, et al. Clinical significance of magnetic resonance imaging findings in rectal cancer. *World J Radiol* 2011;**3**(4):92-104 doi: 10.4329/wjr.v3.i4.92[published Online First: Epub Date].
62. Taylor FG, Quirke P, Heald RJ, et al. One millimetre is the safe cut-off for magnetic resonance imaging prediction of surgical margin status in rectal cancer. *Br J Surg* 2011;**98**(6):872-79 doi: 10.1002/bjs.7458[published Online First: Epub Date].
63. Lugli A, Tornillo L, Cathomas G, et al. Colon et rectum. In: Dirnhofer S, Bubendorf L, Lehr H-A, et al., eds. *Recommandations pour la qualité - SSPath*. Bâle: Société Suisse de Pathologie, 2011.
64. Washington K, Berlin J, Branton P, et al. Protocol for the examination of specimens from patients with primary carcinoma of the colon and rectum. Vers. 3.1.0.0. In: Pathologists CoA, ed. *Cancer protocols and Checklists*, 2011.
65. MacDonald AJ, McEwan H, McCabe M, et al. Age at death of patients with colorectal cancer and the effect of lead-time bias on survival in elective vs emergency surgery. *Colorectal Dis* 2011;**13**(5):519-25 doi: CDI2183 [pii] 10.1111/j.1463-1318.2009.02183.x[published Online First: Epub Date].
66. Ascanelli S, Navarra G, Tonini G, et al. Early and late outcome after surgery for colorectal cancer: elective versus emergency surgery. *Tumori* 2003;**89**(1):36-41
67. Biondo S, Marti-Rague J, Kreisler E, et al. A prospective study of outcomes of emergency and elective surgeries for complicated colonic cancer. *Am J Surg* 2005;**189**(4):377-83 doi: S0002-9610(05)00085-1 [pii] 10.1016/j.amjsurg.2005.01.009[published Online First: Epub Date].
68. Thompson GA, Cocks JR, Collopy BT, et al. Clinical indicators in colorectal surgery. *J Qual Clin Pract* 1996;**16**(1):31-5; discussion 37
69. Morris EJ, Taylor EF, Thomas JD, et al. Thirty-day postoperative mortality after colorectal cancer surgery in England. *Gut* 2011;**60**(6):806-13 doi: gut.2010.232181 [pii] 10.1136/gut.2010.232181[published Online First: Epub Date].



- 1  
2  
3 70. McArdle CS, McKee RF, Finlay IG, et al. Improvement in survival following surgery for  
4 colorectal cancer. *Br J Surg* 2005;**92**(8):1008-13 doi: 10.1002/bjs.4874[published Online  
5 First: Epub Date].
- 6 71. Rutten HJ, den Dulk M, Lemmens VE, et al. Controversies of total mesorectal excision for  
7 rectal cancer in elderly patients. *Lancet Oncol* 2008;**9**(5):494-501 doi: S1470-2045(08)70129-  
8 3 [pii]  
9 10.1016/S1470-2045(08)70129-3[published Online First: Epub Date].
- 10 72. Rogers SO, Jr., Ayanian JZ, Ko CY, et al. Surgeons' volume of colorectal cancer procedures and  
11 collaborative decision-making about adjuvant therapies. *Ann Surg* 2009;**250**(6):895-900 doi:  
12 10.1097/SLA.0b013e3181afe0c6[published Online First: Epub Date].
- 13 73. Kurtz JE, Heitz D, Serra S, et al. Adjuvant chemotherapy in elderly patients with colorectal  
14 cancer. A retrospective analysis of the implementation of tumor board recommendations in a  
15 single institution. *Crit Rev Oncol Hematol* 2010;**74**(3):211-7 doi: S1040-8428(09)00120-6  
16 [pii]  
17 10.1016/j.critrevonc.2009.05.003[published Online First: Epub Date].
- 18 74. Jarry J, Faucheron JL, Moreno W, et al. Delayed colo-anal anastomosis is an alternative to  
19 prophylactic diverting stoma after total mesorectal excision for middle and low rectal  
20 carcinomas. *Eur J Surg Oncol* 2010;**37**(2):127-33 doi: S0748-7983(10)00607-4 [pii]  
21 10.1016/j.ejso.2010.12.008[published Online First: Epub Date].
- 22 75. Junginger T, Gonner U, Trinh TT, et al. Permanent stoma after low anterior resection for rectal  
23 cancer. *Dis Colon Rectum* 2010;**53**(12):1632-9 doi: 10.1007/DCR.0b013e3181ed0aae  
24 00003453-201012000-00007 [pii][published Online First: Epub Date].
- 25 76. Neuman HB, Patil S, Fuzesi S, et al. Impact of a Temporary Stoma on the Quality of Life of  
26 Rectal Cancer Patients Undergoing Treatment. *Ann Surg Oncol* 2010 doi: 10.1245/s10434-  
27 010-1446-9[published Online First: Epub Date].
- 28 77. Ramirez JM, Aguilera V, Valencia J, et al. Transanal endoscopic microsurgery for rectal  
29 cancer. Long-term oncologic results. *Int J Colorectal Dis* 2011 doi: 10.1007/s00384-011-  
30 1132-9[published Online First: Epub Date].
- 31 78. Lezoche G, Guerrieri M, Baldarelli M, et al. Transanal endoscopic microsurgery for 135  
32 patients with small nonadvanced low rectal cancer (iT1-iT2, iN0): short- and long-term  
33 results. *Surg Endosc* 2010 doi: 10.1007/s00464-010-1347-9[published Online First: Epub  
34 Date].
- 35 79. Doornebosch PG, Tollenaar RA, De Graaf EJ. Is the increasing role of Transanal Endoscopic  
36 Microsurgery in curation for T1 rectal cancer justified? A systematic review. *Acta Oncol*  
37 2009;**48**(3):343-53 doi: 904089695 [pii]  
38 10.1080/02841860802342408[published Online First: Epub Date].
- 39 80. Elferink MA, Siesling S, Lemmens VE, et al. Variation in Lymph Node Evaluation in Rectal  
40 Cancer: A Dutch Nationwide Population-Based Study. *Ann Surg Oncol* 2010 doi:  
41 10.1245/s10434-010-1269-8[published Online First: Epub Date].
- 42 81. Elferink MA, Siesling S, Visser O, et al. Large variation between hospitals and pathology  
43 laboratories in lymph node evaluation in colon cancer and its impact on survival, a nationwide  
44 population-based study in the Netherlands. *Ann Oncol* 2011;**22**(1):110-7 doi: mdq312 [pii]  
45 10.1093/annonc/mdq312[published Online First: Epub Date].
- 46 82. Kelder W, Inberg B, Schaapveld M, et al. Impact of the number of histologically examined  
47 lymph nodes on prognosis in colon cancer: a population-based study in the Netherlands. *Dis*  
48 *Colon Rectum* 2009;**52**(2):260-7 doi: 10.1007/DCR.0b013e3181979164  
49 00003453-200902000-00013 [pii][published Online First: Epub Date].
- 50 83. Vather R, Sammour T, Kahokehr A, et al. Lymph node evaluation and long-term survival in  
51 Stage II and Stage III colon cancer: a national study. *Ann Surg Oncol* 2009;**16**(3):585-93 doi:  
52 10.1245/s10434-008-0265-8[published Online First: Epub Date].  
53  
54  
55  
56  
57  
58  
59  
60

- 1  
2  
3 84. Lindebjerg J, Spindler KL, Ploen J, et al. The prognostic value of lymph node metastases and  
4 tumour regression grade in rectal cancer patients treated with long-course preoperative  
5 chemoradiotherapy. *Colorectal Dis* 2009;**11**(3):264-9 doi: CDI1599 [pii]  
6 10.1111/j.1463-1318.2008.01599.x[published Online First: Epub Date]].  
7  
8 85. Choi HK, Law WL, Poon JT. The optimal number of lymph nodes examined in stage II  
9 colorectal cancer and its impact of on outcomes. *BMC Cancer* 2010;**10**:267 doi: 1471-2407-  
10 10-267 [pii]  
11 10.1186/1471-2407-10-267[published Online First: Epub Date]].  
12 86. Nelson H, Petrelli N, Carlin A, et al. Guidelines 2000 for colon and rectal cancer surgery. *J Natl*  
13 *Cancer Inst* 2001;**93**(8):583-96  
14 87. Smith AJ, Driman DK, Spithoff K, et al. Guideline for optimization of colorectal cancer surgery  
15 and pathology. *J Surg Oncol* 2010;**101**(1):5-12 doi: 10.1002/jso.21395[published Online First:  
16 Epub Date]].  
17 88. Andre T, Boni C, Navarro M, et al. Improved overall survival with oxaliplatin, fluorouracil, and  
18 leucovorin as adjuvant treatment in stage II or III colon cancer in the MOSAIC trial. *J Clin*  
19 *Oncol* 2009;**27**(19):3109-16 doi: JCO.2008.20.6771 [pii]  
20 10.1200/JCO.2008.20.6771[published Online First: Epub Date]].  
21 89. Twelves C, Wong A, Nowacki MP, et al. Capecitabine as adjuvant treatment for stage III colon  
22 cancer. *N Engl J Med* 2005;**352**(26):2696-704 doi: 352/26/2696 [pii]  
23 10.1056/NEJMoa043116[published Online First: Epub Date]].  
24 90. Van Cutsem E, Labianca R, Bodoky G, et al. Randomized phase III trial comparing biweekly  
25 infusional fluorouracil/leucovorin alone or with irinotecan in the adjuvant treatment of stage  
26 III colon cancer: PETACC-3. *J Clin Oncol* 2009;**27**(19):3117-25 doi: JCO.2008.21.6663 [pii]  
27 10.1200/JCO.2008.21.6663[published Online First: Epub Date]].  
28 91. Sobrero A. Lower GI. In: *ESMO*, ed. *ESMO Highlights 2010*, 2010.  
29 92. Des Guetz G, Nicolas P, Perret GY, et al. Does delaying adjuvant chemotherapy after curative  
30 surgery for colorectal cancer impair survival? A meta-analysis. *Eur J Cancer*  
31 2010;**46**(6):1049-55 doi: S0959-8049(10)00039-0 [pii]  
32 10.1016/j.ejca.2010.01.020[published Online First: Epub Date]].  
33 93. Dienstmann R, Vilar E, Taberero J. Molecular predictors of response to chemotherapy in  
34 colorectal cancer. *Cancer J* 2011;**17**(2):114-26 doi: 10.1097/PPO.0b013e318212f844  
35 00130404-201103000-00007 [pii][published Online First: Epub Date]].  
36 94. Van Cutsem E, Kohne CH, Hitre E, et al. Cetuximab and chemotherapy as initial treatment for  
37 metastatic colorectal cancer. *N Engl J Med* 2009;**360**(14):1408-17 doi: 360/14/1408 [pii]  
38 10.1056/NEJMoa0805019[published Online First: Epub Date]].  
39 95. Hutchins G, Southward K, Handley K, et al. Value of mismatch repair, KRAS, and BRAF  
40 mutations in predicting recurrence and benefits from chemotherapy in colorectal cancer. *J Clin*  
41 *Oncol* 2011;**29**(10):1261-70 doi: JCO.2010.30.1366 [pii]  
42 10.1200/JCO.2010.30.1366[published Online First: Epub Date]].  
43 96. Van Cutsem E, Nordlinger B, Cervantes A. Advanced colorectal cancer: ESMO Clinical  
44 Practice Guidelines for treatment. *Ann Oncol* 2010;**21**(suppl. 5):v93-v97  
45 97. Glimelius B, Holm T, Blomqvist L. Chemotherapy in addition to preoperative radiotherapy in  
46 locally advanced rectal cancer - a systematic overview. *Rev Recent Clin Trials* 2008;**3**(3):204-  
47 11  
48 98. Glimelius B, Pahlman L, Cervantes A. Rectal cancer: ESMO Clinical Practice Guidelines for  
49 diagnosis, treatment and follow-up. *Ann Oncol* 2010;**21**(suppl. 5):v82-v86  
50 99. Landheer ML, Therasse P, van de Velde CJ. The importance of quality assurance in surgical  
51 oncology in the treatment of colorectal cancer. *Surg Oncol Clin N Am* 2001;**10**(4):885-914, x  
52 100. Wagner G. *Tumor-Lokalisationsschlüssel. International Classification of Diseases for*  
53 *Oncology ICD-O, 2. Topographischer Teil*. 5th ed. Berlin: Springer-Verlag, 1993.  
54  
55  
56  
57  
58  
59  
60

1  
2  
3  
4  
5  
6  
7  
8  
9  
10  
11  
12  
13  
14  
15  
16  
17  
18  
19  
20  
21  
22  
23  
24  
25  
26  
27  
28  
29  
30  
31  
32  
33  
34  
35  
36  
37  
38  
39  
40  
41  
42  
43  
44  
45  
46  
47  
48  
49  
50  
51  
52  
53  
54  
55  
56  
57  
58  
59  
60

For peer review only



1  
2  
3  
4  
5  
6  
7 **Original Article**  
8

9  
10  
11 **Quality indicators of Clinical Cancer Care (QC<sub>3</sub>) in colorectal cancer**  
12  
13

14  
15 | Valentina Bianchi<sup>1</sup>, Alessandra Spitale<sup>1</sup>, [Laura Orтели<sup>1</sup>](#), Luca Mazzucchelli<sup>2</sup>, Andrea Bordoni<sup>1</sup> and  
16 the QC<sub>3</sub> CRC Working Group<sup>3</sup>  
17  
18  
19

20  
21 <sup>1</sup>Cantonal Institute of Pathology, Ticino Cancer Registry, 6600 Locarno, Switzerland  
22

23 <sup>2</sup>Cantonal Institute of Pathology, Clinical Pathology, 6600 Locarno, Switzerland  
24

25 <sup>3</sup>Members of the QC<sub>3</sub> Colorectal Working Group are listed in the Appendix  
26  
27

28 **Running title: Quality indicators of clinical care in colorectal cancer**  
29  
30

31  
32 **Corresponding author:**  
33

34 Valentina Bianchi, M.D., Cantonal Institute of Pathology, Ticino Cancer Registry, , Via in Selva  
35 24, 6600 Locarno, Switzerland - e-mail: [valentina.bianchi-galdi@ti.ch](mailto:valentina.bianchi-galdi@ti.ch); phone: +41 91 8160826;  
36 fax: +41 91 8160829  
37  
38  
39

40  
41 **Key words:** *quality of cancer care, colorectal cancer, quality indicators, cancer registry,*  
42 *population-based study*  
43  
44

45  
46  
47 **Word count:** **28143702 (excluding the Abstract)**  
48  
49  
50  
51  
52  
53  
54  
55  
56  
57  
58  
59  
60

**ABSTRACT**

**Objectives:** Assessing the quality of cancer care (QoCC) has become increasingly important to providers, regulators and purchasers of care worldwide. Aim of this study was to develop evidence-based quality indicators (QI) for colorectal cancer (CRC) to be applied in a population-based setting.

**Design:** A comprehensive evidence-based literature search was performed to identify the initial list of QI, which were then selected and developed using a two-step modified Delphi process involving two multidisciplinary expert panels with expertise in colorectal cancer care, quality of care and epidemiology.

**Setting:** The QC<sub>3</sub> population-based project, which involve all the public and private hospitals and clinics present on the territory of Canton Ticino (South Switzerland).

**Participants:** Ticino Cancer Registry, The Colorectal Cancer Working Group (CRC-WG) and the external academic Advisory Board (AB).

**Main outcome measures:** Set of quality indicators (QI) which encompass the whole diagnostic-treatment process of colorectal cancer.

**Results:** Of the 149 QI emerged from 181 sources of literature, 104 were selected during the in-person meeting of the CRC-WG. During the Delphi process, the CRC-WG shortened the list to 89 QI. The AB finally validated 27 QI according to the phase of care: diagnosis (N=6), pathology (N=3), treatment (N=16), and outcome (N=2).

**Conclusions:** Using the validated Delphi methodology, including literature review of the evidence and integration of expert opinions from local clinicians and international experts we were able to develop a list of QI to assess QoCC for CRC. This will hopefully guarantee feasibility of data retrieval, acceptance and translation of QI into the daily clinical practice to improve QoCC.

Moreover, evidence-based selected QI allow to assess immediate changes and improvements in the diagnostic-therapeutic process that could be translated in a short-term benefit for patients with a possible gaining both in overall and disease-free survival.

## ARTICLE SUMMARY

### Article focus

- Quality of Cancer care (QoCC) studies on specific quality indicators (QI) developed worldwide since the late '90s showed both a continuous improvement of oncologic care provided by the clinical structures involved and an increased availability of specialized care in the considered areas.
- This study aims to define evidence-based QI for colorectal cancer (CRC) care-(CRC), in order to favour the a feasible evaluation of the oncologic diagnostic-therapeutic process, which can be followed by the definition of standards of care for each QI, in terms of minimum and target requirements from a population-based cancer registration and data collection point of view.

### Key messages

- QI should be defined, developed and tested with scientific evidence-based rigor in a careful and transparent manner, taking into account their degree of relevancy, validity, reliability and feasibility.
- The selected CRC QI can be applied in a population-based setting, implying the inclusion of the elderly, considering age an extremely important determinant of treatment.

### Strengths and limitations of this study

- To develop the CRC QI we used a formal iterative process, the RAND/UCLA Appropriateness Methodology widely diffused and validated within other QoCC research. The selected QI are representative of the main steps of the diagnostic-therapeutic process.
- Due to the evidence that research studies demonstrated that single-discipline panels select different indicators than do multidisciplinary panels and to maximize the applicability of CRC QI, we constituted two panels of experts, a local Working Group and an external national/international academic Advisory Board, which could offer a multidisciplinary

perspective on practice and who can guarantee that the selected QI and their results will be comparable with national and international data.

• The possible limitations of the current work are the following:

➤ is the level of evidence found in the literature. However, this situation is common to many aspects of health care, and it was the reason that the expert panel methodology was developed – specifically, to identify the processes that are most likely to be valid measures of quality when the highest level of evidence is not available.

➤ the literature selection could have missed some relevant articles. However, members of the Working Group were likely to be very familiar with the literature, and had the opportunity to suggest other indicators based on their experience and literature search; in this way, we believe to have integrated the best research evidence with clinical expertise.

➤ the feasibility of measuring indicators in terms of data collection and calculation. However, both the Working Group and the Advisory Board were concerned about the feasibility, validity and reliability of clinical data collection, necessary for the calculation of each single indicator at the population-based level. In fact, in order to warrant an accurate measurement, those indicators reaching more than 70% of the agreement, confirming their scientific and clinical value, but evaluated at least by one of the experts not feasible and difficult to be collected at the population-based level, were definitely excluded. In this way, we have overcome the feasibility limit.

Formatted: Bullets and Numbering

## INTRODUCTION

Research on QoCC performed during the last decade has demonstrated that the increase in knowledge on treatments with proven efficacy do not directly translate into optimal delivery of such treatments to patients. Moreover, accumulating evidence suggests that underuse and overuse of care may occur for patients with cancer.<sup>[1-2][1-2]</sup> In addition to survival analysis, to evaluate and compare quality of care at the population-based level, the assessment of QoCC has become increasingly important to providers, regulators and purchasers of care to growing demand for services, rising costs, constrained resources and evidence of variation in clinical practice.<sup>[3][3]</sup> QoCC studies and structured programmes on specific quality indicators (QI) have been developed worldwide since the late '90s, showing both a continuous improvement of oncologic care provided by the clinical structures involved and an increased availability of specialized care in the considered areas. Most of these studies have been implemented at the regional level on a territory with uniform legislative, health and geographical characteristics, increasing the likelihood of recruitment of involved clinicians.<sup>[1 4-7][1, 4-7]</sup>

So far, in Switzerland no population-based study on QoCC with a prospective design has been implemented. In addition to the yearly renewed international guidelines for each type of cancer, there is still the need to evaluate the real conditions of care in the community. Population-based Cancer Registry data are therefore essential to describe and reflect real world and routine care as well as to provide regular feedback to healthcare workers and decision makers about the management of a disease in the daily practice and those treatments that are routinely prescribed and/or effective in all patient groups.<sup>[8][8]</sup> Moreover, Cancer Registries represent an independent observatory, thus assuring a fair evaluation service, avoiding any conflicts of interest.

We, therefore, implemented the QC<sub>3</sub> project, focusing on QoCC about the diagnosis-treatment process in colon-rectum, prostate, uterus, ovary and lung cancers in the territory of Canton Ticino (South Switzerland).

Field Code Changed

1  
2  
3  
4  
5  
6  
7 Colorectal cancer (CRC) is an important health issue worldwide. It is the most common malignancy  
8  
9 in Europe (excluding non-melanoma skin cancers) and the second most common in terms of cancer-  
10  
11 related mortality.<sup>[9][9]</sup> In Switzerland, CRC is the second and third most frequent tumour in  
12  
13 women and men, respectively. About 4000 CRC cases are diagnosed annually, corresponding to a  
14  
15 European age-standardized incidence rate equal to 49.4 and 30.6 cases per 100'000 inhabitants in  
16  
17 men and women, respectively, and representing the 11% of all tumours.<sup>[10-12][10-12]</sup> CRC is the  
18  
19 third leading cancer cause of death in Switzerland, with approximately 1600 deaths/year,  
20  
21 corresponding to a European age-standardized mortality rate equal to 18.5 and 10.6 cases per  
22  
23 100'000 inhabitants in men and women, respectively. With a 5-year survival probability equal to  
24  
25 60%, Switzerland is the country with the most favourable prognosis in Europe.<sup>[13][13]</sup> A recent  
26  
27 Swiss report with follow up to 2009 show an additional 5 year survival increase to 62%.<sup>[11][11]</sup>  
28  
29 The aims of the QC<sub>3</sub> [study project](#) are the following: 1) to define and [confirm](#) evidence-based  
30  
31 QoCC indicators for the tumour localizations above cited, in order to favour [a feasible evaluation of](#)  
32  
33 [the oncologic diagnostic-therapeutic process from a population-based cancer registration and data](#)  
34  
35 [collection point of view](#) ~~an improvement of the short term oncologic diagnostic therapeutic process;~~  
36  
37 2) to define and implement at the regional level standards of care for each QoCC measure, in terms  
38  
39 of minimum and target requirements. In the present report we will describe the initial part of the  
40  
41 QC<sub>3</sub> project, meaning the process followed to identify the panel of specific QoCC indicators for the  
42  
43 CRC, as well as the list of QoCC indicators identified and approved both by a dedicated Working  
44  
45 Group of local health care providers and by an external independent Advisory Board, [in a](#)  
46  
47 [perspective of data collection feasibility by a population-based cancer registry.](#)  
48  
49  
50  
51  
52  
53  
54  
55  
56  
57  
58  
59  
60

## MATERIAL AND METHODS

The QC<sub>3</sub> project is a prospective, descriptive study on the QoCC to be implemented in a population-based setting; it is performed by the Ticino Cancer Registry on a 3-year time period (2011-2013) on the territory of Canton Ticino (South Switzerland). In this paper we focus on the initial part of the project: the identification of the CRC quality indicators which will be used to evaluate the QoCC about CRC in our region.

Quality indicators (QI) for CRC were developed involving a local expert panel, named QC<sub>3</sub> Colorectal Working Group (CRC-WG). Elected members, selected on the basis of their expertise and on their daily clinical involvement in CRC care, were contacted to have their interest confirmed in being involved. The final QC<sub>3</sub> CRC-WG encompassed two pathologists, four gastroenterologists, two oncologists, three surgeons, two radiologists, two radiation oncologists and one nuclear medicine specialist, for a total of 15 panellists all working in the public or in the private hospitals and clinics of Canton Ticino (see Appendix 1).

Published studies and references were identified through a comprehensive search on

PubMed/MEDLINE, using initially specific strings/expressions, such as the following: “quality of care OR quality indicators AND colorectal cancer”, “diagnosis OR diagnostic AND quality indicators AND colorectal cancer”, “pathology OR pathological AND quality indicators AND colorectal cancer”, “surgery OR surgical AND quality indicators AND colorectal cancer”, “radiation oncology OR radiotherapy AND quality indicators AND colorectal cancer”, “chemotherapy AND quality indicators AND colorectal cancer”, “surveillance OR follow-up OR outcome AND quality indicators AND colorectal cancer”, “preoperative care OR perioperative care OR intraoperative care OR postoperative care AND colorectal cancer”, “population-based AND quality indicators AND colorectal cancer”. For each of the identified candidate indicators, we performed a systematic literature review to identify the highest level of evidence supporting the validity of that quality indicator for articles published from 1990 onwards. The reference list of the included articles were also examined to identify any additional article that had not been identified in

1  
2  
3  
4  
5  
6  
7 the MEDLINE search. We included all the peer-reviewed articles, but case reports, letters, abstracts  
8 or editorials. If evidence at the highest level were limited or absent, then lower levels of evidence  
9 were evaluated. For example, if data were not available from randomized controlled trials, cohort or  
10 case-control studies, case series and expert opinion or clinical guidelines were reviewed. [A](#)  
11 [selection of already approved QI provided by the American Society of Clinical Oncology \(ASCO\),](#)  
12 [the National Comprehensive Cancer Network \(NCCN\), the National Initiative on Cancer Care](#)  
13 [Quality \(NICCQ\), the Quality Oncology Practice Initiative \(QOPI\) and the Florida Initiative for](#)  
14 [Quality Cancer Care \(FIQCC\), were included in the evaluation list, with the aim to transfer them](#)  
15 [from the clinical to the population-based setting.](#)<sup>[1-2 4 7 14-20]</sup>

Formatted: English (U.K.), Do not check spelling or grammar

16  
17  
18  
19  
20  
21  
22  
23  
24 The initial QI list emerged from 181 sources of literature, and it was proposed to the CRC-WG in  
25 the context of an in-person meeting held at the very beginning of the process. The list was then left  
26 to the QC<sub>3</sub> CRC-WG's evaluation for a period of two weeks. The participants were asked to provide  
27 a whole opinion with written comments about those QI considered pertinent for the assessment of  
28 CRC care quality, to suggest additional QI not already included in the list and to delete those QI  
29 considered not suitable. In order to make the selection and evaluation easier, the QI were  
30 subdivided in chapters recalling the Donabedian's and the National Initiative for Cancer Care  
31 Quality schemes: diagnosis and staging, pathology, treatment, follow-up, outcome.<sup>[2 21][2, 14]</sup>

### 40 41 **Delphi Round 1**

42  
43 The QI selection was done by using a 2-step modified Delphi process.<sup>[22][15]</sup> The initial list of QI,  
44 re-analyzed by the QC<sub>3</sub> CRC-WG, was formatted as a questionnaire, where for each indicator was  
45 specified the numerator, the denominator and the sources of evidence from which it was extracted.  
46  
47 The questionnaire was distributed by regular mail to the QC<sub>3</sub> CRC-WG, so to maintain it  
48 anonymous, along with a stamped, addressed return envelope and an attached letter with the  
49 deadline date of two weeks from the receipt and the instruction for voting. Respondents were asked  
50 to rate each QI adopting the RAND Appropriateness Methodology (scale 1 to 9, 1 = extremely  
51  
52  
53  
54  
55



1  
2  
3  
4  
5  
6  
7 inappropriate; 9 = extremely appropriate), according to selection criteria of relevance, scientific  
8  
9 soundness (validity, reliability, comparability) and feasibility (precise definition and specification,  
10  
11 data feasibility, reliability of data collection).<sup>[23-25][16-18]</sup> Each QI was judged as validated if it  
12  
13 reached a strong consensus for acceptance ( $\geq 70\%$  of the QC<sub>3</sub> CRC-WG rated the QI with a vote  
14  
15  $\geq 7$ ), discarded if it reached a strong consensus for exclusion ( $\geq 70\%$  of the QC<sub>3</sub> CRC-WG rated the  
16  
17 QI with a votes  $\leq 3$ ) and in stand-by if there was an unclear consensus ( $4 \leq \text{votes} \leq 6$ ), which  
18  
19 implies an eventual in-person meeting.  
20  
21

## 22 **Delphi Round 2**

23  
24 The Delphi Round 2 questionnaire was performed with the same modalities of the first round and  
25  
26 enclosed the frequency distribution of round 1 votes, allowing the panellists to eventually alter their  
27  
28 responses, in the light of colleagues' assessments.<sup>[23][16]</sup>  
29  
30

## 31 **Advisory Board Review**

32  
33 The list of selected QI derived from the two Delphi rounds was then submitted to an independent  
34  
35 external national/international academic multidisciplinary Advisory Board (AB), in order to get an  
36  
37 additional evaluation on the suitability of QI as "quality" indexes according to the criteria shown in  
38  
39 the previous paragraph. The intent was to achieve at least one health professional for each specialty.  
40  
41 The AB included one pathologist, one gastroenterologist, two oncologists, two surgeons, one  
42  
43 radiologist, one radiation oncologist, one nuclear medicine specialist and one epidemiologist, for a  
44  
45 total of 10 experts in CRC care (see Acknowledgements); all the panellists are daily involved in the  
46  
47 CRC care and they had been contacted with the same modalities of the QC<sub>3</sub> CRC WG. The selected  
48  
49 QI as well as the corresponding literature sources were distributed to the AB as an electronic form  
50  
51 where their opinion about QI were expressed both as megatrends (i.e. response yes/no to the  
52  
53 suitability of each QI) and as eventual additional comments.<sup>[26]</sup> We considered every single QI as  
54  
55 finally approved by the AB if it achieved  $\geq 70\%$  of the agreement (i.e.  $\geq 70\%$  of respondents should  
56  
57  
58  
59  
60

1  
2  
3  
4  
5  
6  
7 have answered “yes”). Besides the vote (“yes” versus “no”), the panellists had the chance to  
8 comment the single QI from a population-based cancer registration and data collection point of  
9 view. Therefore, those QI reaching more than 70% of the agreement, confirming their scientific and  
10 clinical value, but evaluated at least by one of the experts “not completely feasible and difficult to  
11 be collected at the population-based level”, were definitely excluded.  
12  
13  
14  
15  
16  
17  
18  
19  
20  
21  
22  
23  
24  
25  
26  
27  
28  
29  
30  
31  
32  
33  
34  
35  
36  
37  
38  
39  
40  
41  
42  
43  
44  
45  
46  
47  
48  
49  
50  
51  
52  
53  
54  
55  
56  
57  
58  
59  
60

## RESULTS

The QI selection process began in January 2011 and ended in December 2011.

Participation of CRC-WG members throughout the process was high: 15 (100%) participated to the in-person meeting, 12 (80%) completed both the Delphi round 1 and 2. The Delphi Round 1 questionnaire respondent time were in the range of 18 to 60 days, while for the Round 2, the delay time was in the range of 8 to 55 days; these delays and the time for recruitment of the AB influence the long time spent for this part of the project.

The Figure 1 summarizes the entire process used to select QI for CRC care. The literature search produces 181 citations dealing with CRC QoCC, [including also already validated QI provided by the ASCO, NCCN, NCCQ, QOPI and FIQCC.\[1-2 4 7 14-20\]](#) From this search, we initially selected a total of 149 QI, which were proposed to the CRC-WG in the context of the initial in-person meeting. The following discussion and revision reduced the list to 104 QI before the modified Delphi process started; these QI were divided into the following areas: diagnosis and staging, pathology, treatment, follow-up and outcome. After the whole Delphi process the list was shortened to 89 QI, distributed as following: diagnosis and staging (N=16), pathology (N=20), treatment (N=38), follow-up (N=10), and outcome (N=5). The QI finally underwent to the AB's evaluation; this last step, according to the procedure described in the methods, shortened the final list to 27 QI (~~Tab.1~~): diagnosis (N=6), pathology (N=3); treatment (N=16), follow-up (N=0), and outcome (N=2). [Table 1 reports detailed information for each QI: a\) QI description; b\) criteria for patients inclusion in the numerator and denominator; c\) list of the necessary medical documentation that should be collected by the Cancer Registry to extract the needed and relevant information to built the specific QI, such as the report of the endoscopy, the pathology report of the biopsy and/or surgical resection, the preoperative radiological reports \(e.g. TAC and MRI\), the surgery report, the tumour board documentation, the oncological report, the radiotherapy report and database/documentation of the regional Office of Population Registry Rosters for the assessment of patients vital status \(for outcome QI\); d\) QI rationale; e\) related references.](#)

## DISCUSSION

In the preliminary phase of the QC<sub>3</sub> project shown in this paper we developed a panel of evidence-based CRC QI which are suitable to be implemented in a population-based setting.

To develop the QC<sub>3</sub> QI we used a formal iterative process, the RAND/UCLA Appropriateness

Methodology widely diffused and validated within other QoCC research.<sup>[23-24][16-17]</sup> Due to the evidence that research studies demonstrated that single-discipline panels select different indicators than do multidisciplinary panels and to maximize the applicability of QC<sub>3</sub> CRC QI, we constituted a working group which could offer a multidisciplinary perspective on practice, including specialists, professionals, clinicians and researchers coming from both public and private hospitals.<sup>[27-33][49-25]</sup> Moreover, we have used a further validation step enrolling an independent national/international academic AB. This choice was due to the aim of measuring QoCC within a Swiss region, [with a point of view on the population-based data collection and evaluation](#), and of obtaining results which will be comparable with national and international data. We believe that the expertise and multidisciplinary representativeness of the QC<sub>3</sub> CRC-WG and of the AB will surely increase quality, acceptance and translation of QI into the daily clinical practice.

The selected QI are representative of the main steps of the diagnostic-therapeutic process. The diagnosis QI reflect the importance of a pre-operative evaluation and staging, reliable evaluation of the tumour localization and local invasion, and particularly for the rectal cancers, of a feasible and effective surgery. [The first indicator of the “diagnosis” group is important to understand what happens in a territory where there is not an organized screening programme for colorectal cancers, but only an opportunistic screening strategy. If the tumour is detected because the physician submit the patients older than 50 years old to a fecal occult blood test \(FOBT\) or colonoscopy control or if a patient, being aware of the possible risk, asks his family doctor to undergo screening examinations, is an interesting data to be evaluated, also in the hypothesis of a colorectal cancer screening programme implementation. We, therefore, believe that a higher proportion of patients diagnosed through screening \(FOBT or colonoscopy in asymptomatic patients\) would represent a](#)

1  
2  
3  
4  
5  
6  
7 [higher diagnostic quality, since the therapeutic approach and, consequently, the patients outcome](#)  
8 [\(in terms of recurrence and survival\) would be more favourable, as reported in the literature.\[20 34-](#)  
9 [39\]](#) The pathology QI reflect the importance of a good communication between clinicians and  
10  
11 pathologists in terms of patient's clinical history and consequent evaluation of the effectiveness of a  
12  
13 neo-adjuvant therapy; moreover, there is a need of standardization of the pathologic report  
14  
15 following the international guidelines (e.g. take at least three samples of tumour during the  
16  
17 macroscopy), not leaving any items unexplained or implicit. [In particular, the third QI reported in](#)  
18  
19 [Table 1 \(pathology section\) refers to the surgical pathology report, which derives from the surgical](#)  
20  
21 [curative intervention and should be as complete as possible to be useful for the future decision](#)  
22  
23 [about patient's treatment. Our intent is to calculate it for all listed items considered together, but](#)  
24  
25 [also for each item individually analyzed: e.g. proportion of patients with colorectal cancer and a](#)  
26  
27 [definitive pathological report including the surgical intervention description; proportion of patients](#)  
28  
29 [with colorectal cancer and a definitive pathological report including the tumour size; proportion of](#)  
30  
31 [patients with colorectal cancer and a definitive pathological report including the resection margins;](#)  
32  
33 [proportion of patients with colorectal cancer and a definitive pathological report including the](#)  
34  
35 [pathological staging \(AJCC pTNM\); etc...](#) The treatment QI cover the general issues of surgery,  
36  
37 such as emergency, postoperative mortality and a multidisciplinary discussion of the clinical case;  
38  
39 furthermore, they focus on the debate of the retrieved lymph nodes, on the timing between  
40  
41 radiotherapy and surgery, on the adjuvant chemotherapy and on the attitude towards the metastatic  
42  
43 patients. The two main items of the outcome chapter refers to the overall and disease-free survival.  
44  
45 [Although -it is necessary to wait for a certain follow-up period \(i.e. 1, 3, 5 to 10 years from the date](#)  
46  
47 [diagnosis for the calculation of overall survival, and from the date of curative treatment for the](#)  
48  
49 [calculation of disease-free survival\), they will represent the overall resume of the diagnostic and](#)  
50  
51 [treatment quality of CRC patients. Our intent will be to analyse overall and disease-free survival](#)  
52  
53 [according to some of the proposed QI \(such as QI concerning the pathological characteristics of the](#)  
54  
55 [tumours, QI of the adjuvant chemotherapy in patients with colon cancer and AJCC TNM stage II](#)

1  
2  
3  
4  
5  
6  
7 [high-risk or III. QI of colorectal patients operated on with free margins, QI of locally advanced](#)  
8 [rectal cancer patients undergoing neo-adjuvant radio±chemotherapy, etc... \). We will finally](#)  
9 [compare our results with other regional and national reality, favouring the interpretation of each](#)  
10 [single QI.](#) Concerning the QI about follow-up, AB did not finally include any of them. Indeed,  
11 although the follow-up procedures are suggested by several international guidelines, they are based  
12 on level II-III evidence and controversies remain regarding selection of optimal strategies for  
13 following up patients after potentially curative [CRC colorectal cancer](#) surgery. [\[40-43\]\[26-29\]](#)  
14  
15 The first limitation of the current work is the level of evidence found in the literature. For some  
16 indicators, strong evidence of their validity was not available from RCTs. However this situation is  
17 common to many aspects of health care, and it was the very reason that the expert panel  
18 methodology was developed – specifically, to identify ~~the~~ processes that are most likely to be valid  
19 measures of quality when the highest level of evidence is not available. [\[19 23 44\]\[16, 30-31\]](#)  
20  
21 Secondly, we may have missed some studies during the literature search and, consequently, some  
22 QI has not been proposed to the QC<sub>3</sub> CRC-WG since the beginning of the QI revision process.  
23 However, this limitation should have been overcome by the fact that the members of the QC<sub>3</sub> CRC-  
24 WG were likely to be very familiar with the literature, and had the opportunity to suggest other QI  
25 based on their experience [and literature search.](#) [\[7 27-28 45\]\[7, 19-20, 32\]](#) Thus we integrated the  
26 best research evidence with clinical expertise, as reported by Sackett *et al.* [\[46\]\[33\]](#) A further limit  
27 could be the feasibility of measuring QI in terms of data collection and calculation, which is  
28 immediately the next step. Actually, the QI selected by both the QC<sub>3</sub> CRC-WG and the AB  
29 represent an ideal set of criteria to measure the quality of CRC care; at the same time they both  
30 were concerned about the feasibility, validity and reliability of clinical data collection, necessary for  
31 the calculation of each single QI [at the population-based level.](#) This is the reason why most of the  
32 identified QC<sub>3</sub> QI are common to many QoCC studies. [\[1-2 4 7 14-20\]](#) [Besides the traditional](#)  
33 [Delphi process, the panellists had the chance to comment the single QI from a population-based](#)  
34 [cancer registration and data collection point of view. Therefore, in order to warrant an accurate](#)  
35  
36  
37  
38  
39  
40  
41  
42  
43  
44  
45  
46  
47  
48  
49  
50  
51  
52  
53  
54  
55  
56  
57  
58  
59  
60

1  
2  
3  
4  
5  
6  
7 [measurement, those QI reaching more than 70% of the agreement, confirming their scientific and](#)  
8 [clinical value, but evaluated at least by one of the experts not feasible and difficult to be collected at](#)  
9 [the population-based level, were definitely excluded.](#) In addition, we performed a retrospective  
10 preliminary pilot collection on the detailed and necessary incidence data of CRC occurred in 2011,  
11 realising that the measurement of most QI is feasible, whereas for some selected QI the retrieving of  
12 variables ~~should~~ [would need be additional effortsly tested](#); ~~some preliminary results were presented~~  
13 [in national and international conferences and congresses, receiving positive feedback by both the](#)  
14 [clinical and epidemiological setting.](#)<sup>[47-50]</sup><sup>[34-35]</sup> Only the definitive results will give us the  
15 proportion of missing information, whose magnitude will be assessed.

16  
17  
18  
19  
20  
21  
22  
23  
24 The selected QC<sub>3</sub> CRC QI will be applied in a population-based setting, where age is an extremely  
25 important determinant of treatment. The elderly are rarely included in the randomized clinical trials  
26 with the consequence of a possible “underuse of treatment”.<sup>[25 51-52]</sup><sup>[18, 36-37]</sup> At a broad  
27 European level, national audit registries in surgical oncology have led to improvements with a great  
28 impact and they offered the possibility, as for our project, to perform research on patients that are  
29 usually excluded from clinical trials such as elderly and co-morbid patients.<sup>[53-54]</sup><sup>[38-39]</sup>

30  
31  
32  
33  
34  
35  
36  
37  
38  
39  
40  
41  
42  
43  
44  
45  
46  
47  
48  
49  
50  
51  
52  
53  
54  
55  
56  
57  
58  
59  
60  
Evidence suggests that the relative benefits of treatment for the elderly are similar to those seen for  
cancer patients in general, though decision making for treatment becomes more complex as life  
expectancy, co-existing illnesses, and functional status all need to be considered.<sup>[25 51-52]</sup><sup>[18, 36-  
37]</sup> Applying these QI and if all these items will be satisfied we can affirm to have a real good  
quality process of CRC care for the whole population. The foreseeable future in quality evaluation  
and improvement for health care will likely involve more and more frequently the use of QI by  
regulatory and accrediting agencies, stakeholders, clinicians, individual hospitals and health care  
providers, as well as patients. This underlines that the QI should be defined, developed and tested  
with scientific evidence-based rigor in a careful and transparent manner, taking into account their  
degree of relevancy, validity, reliability and feasibility.<sup>[30 32]</sup><sup>[22, 24]</sup> Although QI have been

1  
2  
3  
4  
5  
6  
7 defined in several different ways, all authors agreed that the final aim is the improvement of  
8  
9 patients outcome.[\[31 33 55\]](#)~~[\[23, 25, 40\]](#)~~

10 The systematic trend analysis of QI allows to assess immediate changes and improvements in the  
11  
12 diagnostic-therapeutic process that could be translated in a short-term benefit for patient, without  
13  
14 waiting for survival analysis typically needed some years to be produced because of the patients'  
15  
16 follow-up. Furthermore, this system of evaluation and auto-evaluation could favour the surveillance  
17  
18 and monitoring of the comprehensive level of the oncologic care in the region, the clinical  
19  
20 performance homogeneity, the possible weakness of the clinical network, and finally the corrective  
21  
22 interventions to be adopted to improve the QoCC.

23  
24 With this study, we hope to increase the awareness of the value of QI in health care so to encourage  
25  
26 more uniform practices and improve provider documentation of medical care in our region;  
27  
28 moreover, we hope that standardization of QI among different regions will help to define threshold  
29  
30 of minimal standard of care.  
31  
32  
33  
34  
35  
36  
37  
38  
39  
40  
41  
42  
43  
44  
45  
46  
47  
48  
49  
50  
51  
52  
53  
54  
55  
56  
57  
58  
59  
60



**APPENDIX (List of Collaborators)**

Members of the QC<sub>3</sub> CRC Working Group are listed as following:

*Barizzi J., Clinical Pathology, Cantonal Institute of Pathology, 6600 Locarno, Switzerland; Bihl F., Gastroenterology Dept., Ospedale Regionale Bellinzona e Valli, 6500 Bellinzona Switzerland; Christoforidis D., General Surgery Dept., Ospedale Regionale di Lugano, 6900 Lugano, Switzerland; Franzetti-Pellanda A., Radiation Oncology Dept., Clinica Luganese, 6900 Lugano, Switzerland; Giovanella L., Nuclear Medicine Dept., Oncology Institute of Southern Switzerland (IOSI), 6500 Bellinzona, Switzerland; Heinkel J., Radiology Dept., Ospedale La Carità, 6600 Locarno, Switzerland; Maffei M., Gastroenterology Dept., Ospedale Regionale di Lugano, 6900 Lugano, Switzerland; Mazzucchelli L., Clinical Pathology, Cantonal Institute of Pathology, 6600 Locarno, Switzerland; Miazza B., Gastroenterology Dept., Ospedale Regionale di Lugano, 6900 Lugano, Switzerland; Pelloni A., General Surgery Dept., Ospedale La Carità, 6600 Locarno, Switzerland; Quattropani C., Gastroenterology Dept., Clinica Luganese, 6900 Lugano, Switzerland; Rosso R., General Surgery Dept., Ospedale Regionale di Lugano, 6900 Lugano, Switzerland; Saletti P., Medical Oncology Dept., Oncology Institute of Southern Switzerland (IOSI), 6500 Bellinzona, Switzerland; Valli M. C., Radiation Oncology Dept., Oncology Institute of Southern Switzerland (IOSI), 6500 Bellinzona, Switzerland; Varini M., Medical Oncology Dept., Clinica Sant'Anna, 6900 Lugano, Switzerland; Wyttenbach R., Radiology Dept., Ospedale Regionale Bellinzona e Valli, 6500 Bellinzona, Switzerland.*

**FUNDING**

This work was supported by Krebsforschung Schweiz, grant number KFS – 02668-08-2010, and by Advisory Board Research Ente Ospedaliero Cantonale Bellinzona, grant number ABREOC 10/2010.

The funding sources have not any involvement in the study design, in the collection, analysis and interpretation of data, in the writing of the report and in the decision to submit the paper for publication.

**COMPETING INTERESTS**

The Authors have no competing interests.

**DATA SHARING**

There is no additional data available.

**AUTHORS' CONTRIBUTION**

I declare that V. Bianchi, A. Bordoni, A. Spitale and L. Mazzucchelli have directly participated in the planning of the manuscript; that V. Bianchi, A. Bordoni, A. Spitale and the QC<sub>3</sub> Colorectal Working Group have directly participated in the conducting of the project; that V. Bianchi, A. Bordoni, A. Spitale and L. Ortelli have directly participated in the reporting, acquisition of data or analysis and interpretation of data; and that V. Bianchi and A. Bordoni are responsible for the overall content as guarantors of the work. Finally, I declare that all the Authors have drafted and revised the paper critically for important intellectual content, and that they have given final approval of the version published. None of the Authors have competing interests.

## ACKNOWLEDGEMENTS

We are particularly grateful to the QC<sub>3</sub> CRC AB Members, who contribute to critically review the QC<sub>3</sub> CRC QI, for their precious collaboration:

*Prof. Franco Cavalli, Scientific Director, Oncologic Institute of Italian Switzerland (IOSI), Bellinzona, Switzerland; Prof. Gian Dorta, Director, Digestive Endoscopy Dept., Centre Hospitalier Universitaire Vaudois (CHUV), Lausanne, Switzerland; Prof. Jean Faivre, Director, Registre Bourguignon des Cancers Digestifs, Dijon Cedex, France; Prof. Stefano Fanti, Director, PET Center, Policlinico S. Orsola-Malpighi, Bologna, Italy; Prof. Roberto Labianca, Director, Oncology and Haematology Dept., Ospedali Riuniti, Bergamo, Italy; Prof. Sebastiano Martinoli, Director, General Surgery Dept., Clinica Luganese, Lugano, Switzerland; Prof. Philip Quirke, Director, Leeds Institute of Molecular Medicine (LIMM), Section of Pathology, Wellcome Trust Brenner Building, St James's University Hospital, Leeds, United Kingdom; Prof. Emmanuel Tiret, Chef Pôle Digestif des Hôpitaux Univesitaires Paris Est, Chef Service de Chirurgie Générale et Digestive, Hôpital Saint-Antoine, Paris, France; Prof. Vincenzo Valentini, Director, Unità Operativa Complessa Radioterapia 1, Policlinico Universitario Agostino Gemelli, Rome, Italy; Prof. Dominik Weishaupt, Director, Radiology Dept., Stadtspital Triemli, Zürich, Switzerland.*

1  
2  
3  
4  
5  
6  
7  
8  
9  
10  
11  
12  
13  
14  
15  
16  
17  
18  
19  
20  
21  
22  
23  
24  
25  
26  
27  
28  
29  
30  
31  
32  
33  
34  
35  
36  
37  
38  
39  
40  
41  
42  
43  
44  
45  
46  
47  
48  
49  
50  
51  
52  
53  
54  
55  
56  
57  
58  
59  
60

**COPYRIGHT**

The Corresponding Author has the right to grant on behalf of all Authors and does grant on behalf of all Authors, an exclusive licence on a worldwide basis to the BMJ Publishing Group Ltd, and its Licensees to permit this article (if accepted) to be published in BMJ Open and any other BMJPG L products to exploit all subsidiary rights, as set out in your licence and the Corresponding Author accepts and understands that any supply made under these terms is made by BMJPG L to the Corresponding Author.

For peer review only

1  
2  
3  
4  
5  
6  
7 **LEGENDS TO FIGURES**  
8

9 **FIGURE 1** - Process used to select quality indicators for colorectal cancer care  
10

11 QI = Quality Indicators; QC<sub>3</sub> CRC-WG = QC3 Colorectal Cancer Working Group; AB = Advisory  
12 Board  
13  
14  
15  
16  
17  
18  
19  
20  
21  
22  
23  
24  
25  
26  
27  
28  
29  
30  
31  
32  
33  
34  
35  
36  
37  
38  
39  
40  
41  
42  
43  
44  
45  
46  
47  
48  
49  
50  
51  
52  
53  
54  
55  
56  
57  
58  
59  
60

**Table 1. Quality indicators of colorectal cancer care according to diagnostic-therapeutic process (diagnosis, pathology, treatment - surgery, chemotherapy and radiotherapy - and outcome) and tumour site.**

| CLINICAL DOMAIN    | SITE                                                                                                                                                                    | QUALITY INDICATOR                                                                                                                                                              | NUMERATOR                                                                                                                                                                                                                                                                                                                                   | DENOMINATOR                                                                                | MEDICAL DOCUMENTATION                                                                                                                                                                                                    | RATIONALE                                                                                                          | REF             |
|--------------------|-------------------------------------------------------------------------------------------------------------------------------------------------------------------------|--------------------------------------------------------------------------------------------------------------------------------------------------------------------------------|---------------------------------------------------------------------------------------------------------------------------------------------------------------------------------------------------------------------------------------------------------------------------------------------------------------------------------------------|--------------------------------------------------------------------------------------------|--------------------------------------------------------------------------------------------------------------------------------------------------------------------------------------------------------------------------|--------------------------------------------------------------------------------------------------------------------|-----------------|
| DIAGNOSIS<br>(n=6) | C&R                                                                                                                                                                     | Proportion of patients with colorectal cancer and diagnosis based on symptoms vs screening vs accidental finding                                                               | Number of patients with colorectal cancer whose diagnosis is based on symptoms, defined as appearance or persistence of clinical events and signs, such as rectal bleeding, occult blood in stool, weight loss with no apparent cause, general abdominal discomfort, bowel obstruction, change in bowel habits, constant tiredness, anaemia | Number of patients with colorectal cancer                                                  | Request form of endoscopic examination<br>Endoscopy and surgical pathology reports<br>Reports/discharge letters coming from all hospital units/department (i.e. surgery, medicine, radiation oncology, medical oncology) | Assessment of the patient's take charge                                                                            | [18 34-38]      |
|                    |                                                                                                                                                                         |                                                                                                                                                                                | Number of patients with colorectal cancer whose diagnosis is based on screening, defined as regular examination, such as faecal occult blood test (FOBT) or colonoscopy in asymptomatic patients                                                                                                                                            |                                                                                            |                                                                                                                                                                                                                          |                                                                                                                    |                 |
|                    |                                                                                                                                                                         |                                                                                                                                                                                | Number of patients with colorectal cancer whose diagnosis is an accidental finding following examinations or therapies for other diseases (e.g. hospital admission for other causes...)                                                                                                                                                     |                                                                                            |                                                                                                                                                                                                                          |                                                                                                                    |                 |
|                    | C&R                                                                                                                                                                     | Proportion of patients with colorectal cancer, evaluated by preoperative colonoscopy                                                                                           | Number of patients with colorectal cancer who have been evaluated by a preoperative colonoscopy                                                                                                                                                                                                                                             | Number of patients with colorectal cancer undergoing surgery                               | Endoscopy report<br>Request form of pathology examination<br>Pathology report of endoscopy                                                                                                                               | Planning of further diagnostic procedures and treatments<br>Comprehensiveness of diagnostic and staging evaluation | [7 16 18 40-41] |
| R                  | Proportion of patients with rectal cancer and description of the tumour localization (distance <i>ab ano</i> ) in the endoscopic/pathologic documentation               | Number of patients with rectal cancer who have the description of the tumour localization, in terms of distance <i>ab ano</i> , in the endoscopic/pathologic documentation     | Number of patients with rectal cancer undergoing endoscopy                                                                                                                                                                                                                                                                                  | Endoscopy report<br>Request form of pathology examination<br>Pathology report of endoscopy | Planning of further diagnostic procedures and treatments<br>Comprehensiveness of diagnostic and staging evaluation                                                                                                       | [1 19 56-57]                                                                                                       |                 |
| C&R                | Proportion of patients with colorectal cancer and requests for an initial CT and/or a MRI examination completed by clinical information according to the ACR guidelines | Number of patients with colorectal cancer for which the request of an initial CT and/or a MRI examination is completed by clinical information according to the ACR guidelines | Number of patients with colorectal cancer undergoing initial CT and/or MRI examination                                                                                                                                                                                                                                                      | Radiology (CT and/or MRI examination) report                                               | Providing the necessary information for a comprehensive radiological examination<br><br>Assessment of the quality of the flux of clinical information                                                                    | [7 58]                                                                                                             |                 |

|                                  |     |                                                                                                                                                                                                                                                                                                                                                                                                                                                                                                                                                                                                                                    |                                                                                                                                                                                                                                                                                                                                                                                                                                                                                                                                                                                                                                                                                                                                                                                                                                      |                                                                                                              |                                                                                                                                                                                                  |                                                                                                                                                                                                 |                                    |
|----------------------------------|-----|------------------------------------------------------------------------------------------------------------------------------------------------------------------------------------------------------------------------------------------------------------------------------------------------------------------------------------------------------------------------------------------------------------------------------------------------------------------------------------------------------------------------------------------------------------------------------------------------------------------------------------|--------------------------------------------------------------------------------------------------------------------------------------------------------------------------------------------------------------------------------------------------------------------------------------------------------------------------------------------------------------------------------------------------------------------------------------------------------------------------------------------------------------------------------------------------------------------------------------------------------------------------------------------------------------------------------------------------------------------------------------------------------------------------------------------------------------------------------------|--------------------------------------------------------------------------------------------------------------|--------------------------------------------------------------------------------------------------------------------------------------------------------------------------------------------------|-------------------------------------------------------------------------------------------------------------------------------------------------------------------------------------------------|------------------------------------|
| <b><u>PATHOLOGY</u></b><br>(n=3) | R   | <a href="#">Proportion of patients with low rectal<sup>a</sup> cancer undergoing pelvic MRI of staging</a>                                                                                                                                                                                                                                                                                                                                                                                                                                                                                                                         | <a href="#">Number of patients with low rectal<sup>a</sup> cancer who have undergone a pelvic MRI of staging</a>                                                                                                                                                                                                                                                                                                                                                                                                                                                                                                                                                                                                                                                                                                                     | <a href="#">Number of patients with low rectal cancer</a>                                                    | <a href="#">Radiology (MRI examination) report</a><br><a href="#">Discharge letters coming from all hospital units/department (i.e. surgery, medicine, medical oncology, radiation oncology)</a> | <a href="#">Planning of further diagnostic procedures and treatments</a><br><a href="#">Comprehensiveness of diagnostic and staging evaluation</a>                                              | <a href="#">[19-59-61]</a>         |
|                                  | R   | <a href="#">Proportion of patients with rectal cancer and a preoperative MRI reporting the description of the radial margin status (mm)</a>                                                                                                                                                                                                                                                                                                                                                                                                                                                                                        | <a href="#">Number of patients with rectal cancer who have undergone a preoperative MRI reporting the description of the radial margin status (mm)</a>                                                                                                                                                                                                                                                                                                                                                                                                                                                                                                                                                                                                                                                                               | <a href="#">Number of patients with rectal cancer undergoing preoperative MRI</a>                            | <a href="#">Radiology (MRI examination) report</a>                                                                                                                                               | <a href="#">Planning of further diagnostic procedures and treatments</a><br><a href="#">Comprehensiveness of diagnostic and staging evaluation</a>                                              | <a href="#">[62]</a>               |
|                                  | R   | <a href="#">Proportion of patients with rectal cancer for which the request for the pathological examination includes the information of neo-adjuvant RT±ChT</a>                                                                                                                                                                                                                                                                                                                                                                                                                                                                   | <a href="#">Number of patients with rectal cancer for which the request for the pathological examination includes the information of neo-adjuvant RT±ChT</a>                                                                                                                                                                                                                                                                                                                                                                                                                                                                                                                                                                                                                                                                         | <a href="#">Number of patients with rectal cancer undergoing neo-adjuvant RT±ChT and surgery<sup>a</sup></a> | <a href="#">Request form of pathology examination</a><br><a href="#">Surgical pathology report</a>                                                                                               | <a href="#">Providing the necessary information for a comprehensive pathological examination</a><br><a href="#">Assessment of the quality of the flux of clinical information</a>               | <a href="#">Proposed by CRC-WG</a> |
|                                  | C&R | <a href="#">Proportion of patients with colorectal cancer and a sufficient number of tumour samples (≥3)</a>                                                                                                                                                                                                                                                                                                                                                                                                                                                                                                                       | <a href="#">Number of patients with colorectal cancer for which 3 or more tumour sample were processed for the pathological analysis</a>                                                                                                                                                                                                                                                                                                                                                                                                                                                                                                                                                                                                                                                                                             | <a href="#">Number of patients with colorectal cancer undergoing surgery<sup>a</sup></a>                     | <a href="#">Surgical pathology report</a>                                                                                                                                                        | <a href="#">Comprehensiveness of pathology examination</a>                                                                                                                                      | <a href="#">Proposed by CRC-WG</a> |
|                                  | C&R | <a href="#">Proportion of patients with colorectal cancer and a surgical pathology report including the following characteristics:</a><br><a href="#">- surgical intervention description</a><br><a href="#">- sample length</a><br><a href="#">- tumour localization according to WHO</a><br><a href="#">- tumour size</a><br><a href="#">- histological type according to WHO</a><br><a href="#">- histological grade</a><br><a href="#">- resection margins</a><br><a href="#">- lymph-vascular invasion</a><br><a href="#">- perineural invasion</a><br><a href="#">- tumour deposits (discontinuous extramural extension)</a> | <a href="#">Number of patients with colorectal cancer whose pathological report includes the following characteristics:</a><br><a href="#">- surgical intervention description</a><br><a href="#">- sample length</a><br><a href="#">- tumour localization according to WHO</a><br><a href="#">- tumour size</a><br><a href="#">- histological type according to WHO</a><br><a href="#">- histological grade</a><br><a href="#">- resection margins</a><br><a href="#">- lymph-vascular invasion</a><br><a href="#">- perineural invasion</a><br><a href="#">- tumour deposits (discontinuous extramural extension)</a><br><a href="#">- pathological staging (AJCC pTNM)</a><br><a href="#">- number of retrieved lymph nodes</a><br><a href="#">- treatment effect</a><br><a href="#">-macroscopic integrity of the mesorectum</a> | <a href="#">Number of patients with colorectal cancer undergoing surgery<sup>a</sup></a>                     | <a href="#">Surgical pathology report</a>                                                                                                                                                        | <a href="#">Comprehensiveness and standardisation of surgical pathology report</a><br><a href="#">Comprehensiveness of staging evaluation</a><br><a href="#">Planning of further treatments</a> | <a href="#">[18-19-63-64]</a>      |

|                     |     |                                                                                                                                                                                                                                                            |                                                                                                                                                                               |                                                                                                         |                                                                                                                                                                      |                                                                           |                        |
|---------------------|-----|------------------------------------------------------------------------------------------------------------------------------------------------------------------------------------------------------------------------------------------------------------|-------------------------------------------------------------------------------------------------------------------------------------------------------------------------------|---------------------------------------------------------------------------------------------------------|----------------------------------------------------------------------------------------------------------------------------------------------------------------------|---------------------------------------------------------------------------|------------------------|
|                     |     | <p>- pathological staging (AJCC pTNM)</p> <p>- number of retrieved lymph nodes</p> <p>- treatment effect</p> <p>- macroscopic integrity of the mesorectum (for rectum only)</p> <p>(this quality indicator should be provided for each characteristic)</p> | (for rectum only)                                                                                                                                                             |                                                                                                         |                                                                                                                                                                      |                                                                           |                        |
| TREATMENT<br>(n=16) | C&R | Proportion of patients with colorectal cancer operated in emergency <sup>a</sup>                                                                                                                                                                           | Number of patients with colorectal cancer who have been operated in emergency <sup>b</sup>                                                                                    | Number of patients with colorectal cancer undergoing surgery <sup>a</sup>                               | Radiology and surgery report/discharge letter<br>Surgical pathology report                                                                                           | Assessment of the patient's take charge                                   | [65-67]                |
|                     | C&R | Proportion of patients with colorectal cancer and dead within 30 days and 6 months from the surgery (postoperative mortality)                                                                                                                              | Number of patients with colorectal cancer and dead within 30 days from the surgery<br><br>Number of patients with colorectal cancer and dead within 6 months from the surgery | Number of patients with colorectal cancer undergoing surgery <sup>a</sup>                               | Surgery report/discharge letter<br>Surgical pathology report<br>Access to regional Office of Population Registry Rosters for the assessment of patients vital status | Assessment of the quality of surgical procedure                           | [68-71]                |
|                     | C&R | Proportion of patients with colorectal cancer and postoperative multidisciplinary discussion                                                                                                                                                               | Number of patients with colorectal cancer for which there have been a multidisciplinary discussion after surgery                                                              | Number of patients with colorectal cancer undergoing surgery <sup>a</sup>                               | Surgery, Oncology, Radiation Oncology reports/discharge letters<br>Multidisciplinary discussion documentation                                                        | Planning of further diagnostic procedures and treatments                  | [72-73]                |
|                     | R   | Proportion of patients with malignant rectal polyp (pT1) and complete endoscopic polypectomy                                                                                                                                                               | Number of patients with malignant rectal polyp (pT1) who have undergone a complete endoscopic polypectomy                                                                     | Number of patients with malignant rectal polyp (pT1)                                                    | Endoscopy report, Endoscopic pathology reports                                                                                                                       | Assessment of the quality of surgical procedure                           | Proposed by the CRC-WG |
|                     | R   | Proportion of patients with low rectal <sup>c</sup> cancer and surgical intervention with sphincter preservation                                                                                                                                           | Number of patients with low rectal <sup>c</sup> cancer who have undergone a surgical intervention with sphincter preservation                                                 | Number of patients with low rectal cancer undergoing surgery <sup>a</sup>                               | Surgical pathology report<br>Surgery report/discharge letter                                                                                                         | Assessment of the quality of surgical procedure                           | [74-76]                |
|                     | R   | Proportion of patients with rectal cancer undergoing TEM with R0 resection                                                                                                                                                                                 | Number of patients with rectal cancer who had undergone TEM with R0 resection                                                                                                 | Number of patients with rectal cancer undergoing TEM                                                    | Surgical pathology report<br>Surgery report/discharge letter                                                                                                         | Assessment of the quality of surgical procedure                           | [77-79]                |
|                     | C&R | Proportion of patients with colorectal cancer and a number of resected lymph nodes $\geq$ 12                                                                                                                                                               | Number of patients with colorectal cancer with a number of resected lymph nodes $\geq$ 12                                                                                     | Number of patients with colorectal cancer undergoing surgery <sup>a</sup> , but no neo-adjuvant therapy | Surgical pathology report<br>Surgery report/discharge letter                                                                                                         | Assessment of the quality of surgical procedure and pathology examination | [74-16, 40-41, 80-85]  |
|                     | C&R | Proportion of patients with colorectal cancer operated on with free margins                                                                                                                                                                                | Number of patients with colon cancer who have undergone surgery and have free margins                                                                                         | Number of patients with colorectal cancer undergoing surgery <sup>a</sup>                               | Surgical pathology report<br>Surgery report/discharge letter                                                                                                         | Assessment of the quality of surgical procedure                           | [786-87]               |



|     |                                                                                                                                                                                                                                                                             |                                                                                                                                                                                                                                                                                  |                                                                                                                              |                                                                                                              |                                                                      |                     |
|-----|-----------------------------------------------------------------------------------------------------------------------------------------------------------------------------------------------------------------------------------------------------------------------------|----------------------------------------------------------------------------------------------------------------------------------------------------------------------------------------------------------------------------------------------------------------------------------|------------------------------------------------------------------------------------------------------------------------------|--------------------------------------------------------------------------------------------------------------|----------------------------------------------------------------------|---------------------|
|     |                                                                                                                                                                                                                                                                             |                                                                                                                                                                                                                                                                                  |                                                                                                                              |                                                                                                              | letter                                                               |                     |
| C&R | Proportion of patients with colorectal cancer and AJCC TNM clinical stage I (from T2N0M0) to III (any T, N1M0) undergoing a surgical resection with anastomosis                                                                                                             | Number of patients with colon cancer and AJCC TNM clinical stage I (from T2N0M0) to III (any T, N1M0) who have undergone a surgical resection with anastomosis                                                                                                                   | Number of patients with colorectal cancer and AJCC TNM stage I (from T2N0M0) to III                                          | Radiology report<br>Surgical pathology report<br>Surgery report/discharge letter                             | Assessment of the quality of surgical procedure                      | [40-41 86-87]       |
| C   | Proportion of patients with colon cancer and AJCC TNM stage II (T3N0M0, T4N0M0) high-risk (presence of at least one of the following factors: LN<12, G3, lymph-vascular or perineural invasion, tumour obstruction, tumour perforation, pT4) or III undergoing adjuvant ChT | Number of patients with colon cancer and AJCC TNM stage II (T3N0M0, T4N0M0) high-risk (presence of at least one of the following factors: LN<12, G3, lymph-vascular or perineural invasion, tumour obstruction, tumour perforation, pT4) or III, who have undergone adjuvant ChT | Number of patients with colon cancer and AJCC TNM stage II high-risk or III, undergoing surgery <sup>a</sup>                 | Radiology report<br>Surgical pathology report<br>Surgery oncology reports/discharge letters                  | Assessment of the quality of oncologic treatment                     | [16 18 40-41 88-91] |
| C   | Proportion of patients with colon cancer AJCC TNM stage II high-risk or stage III undergoing adjuvant ChT within 8 weeks from surgical resection                                                                                                                            | Number of patients with colon cancer and AJCC TNM stage II high-risk or III, who have undergone adjuvant ChT within 8 weeks from surgical resection                                                                                                                              | Number of patients with colon cancer and AJCC TNM stage II high-risk or III undergoing surgery <sup>a</sup> and adjuvant ChT | Radiology report<br>Surgical pathology report<br>Surgery oncology reports/discharge letters                  | Assessment of the quality of oncologic treatment                     | [18 92]             |
| C&R | Proportion of patients with colorectal cancer and histology of the primary tumour or metastases obtained before the beginning of ChT                                                                                                                                        | Number of patients with colorectal cancer and histology of the primary tumour or metastases obtained before the beginning of ChT                                                                                                                                                 | Number of patients with colorectal cancer undergoing primary ChT                                                             | Radiology and pathology reports<br>Oncology report/discharge letter                                          | Assessment of the quality of oncologic treatment                     | [40-41]             |
| C&R | Proportion of patients with colorectal cancer and unresectable metastases undergoing first-line ChT or bio-ChT                                                                                                                                                              | Number of patients with colorectal cancer and unresectable metastases who have undergone a first-line ChT or bio-ChT                                                                                                                                                             | Number of patients with colorectal cancer and unresectable metastases                                                        | Radiology and pathology reports<br>Oncology report/discharge letter                                          | Assessment of the quality of oncologic treatment                     | [93-96]             |
| C&R | Proportion of patients with colorectal cancer and hepatic metastases primarily unresectable turned into resectable metastases after neo-adjuvant ChT                                                                                                                        | Number of patients with colorectal cancer and hepatic metastases primarily unresectable turned into resectable metastases after neo-adjuvant ChT                                                                                                                                 | Number of patients with colorectal cancer and unresectable hepatic metastases undergoing neo-adjuvant ChT                    | Radiology report<br>Oncology report/discharge letter                                                         | Assessment of the quality of oncologic treatment                     | [96]                |
| R   | Proportion of patients with locally advanced rectal cancer (T3-4 and/or any T, N+ and M0) undergoing neo-adjuvant RT±ChT                                                                                                                                                    | Proportion of patients with locally advanced rectal cancer (T3-4 and/or any T, N+ and M0) who have undergone neo-adjuvant RT±ChT                                                                                                                                                 | Number of patients with locally advanced rectal cancer undergoing surgery <sup>a</sup>                                       | Endoscopic pathology report<br>Radiology report<br>Radiation Oncology and oncology reports/discharge letters | Assessment of the quality of oncologic and radio-oncologic treatment | [97-98]             |
| R   | Proportion of patients with                                                                                                                                                                                                                                                 | Number of patients with rectal cancer who                                                                                                                                                                                                                                        | Number of patients with rectal                                                                                               | Endoscopic pathology                                                                                         | Assessment of the quality                                            | [18 98]             |

1  
2  
3  
4  
5  
6  
7  
8  
9  
10  
11  
12  
13  
14  
15  
16  
17  
18  
19  
20  
21  
22  
23  
24  
25  
26  
27  
28  
29  
30  
31  
32  
33  
34  
35  
36  
37  
38  
39  
40  
41  
42  
43  
44  
45  
46  
47  
48  
49

|                         |                         |                                                                                                                                 |                                                                                                                                    |                                                                                       |                                                                                                                                         |                                                            |                        |
|-------------------------|-------------------------|---------------------------------------------------------------------------------------------------------------------------------|------------------------------------------------------------------------------------------------------------------------------------|---------------------------------------------------------------------------------------|-----------------------------------------------------------------------------------------------------------------------------------------|------------------------------------------------------------|------------------------|
|                         |                         | <a href="#">rectal cancer and undergoing neo-adjuvant RT±ChT operated within 6-8 weeks after the end of neo-adjuvant RT±ChT</a> | <a href="#">have undergone neo-adjuvant RT±ChT and were operated within 6-8 weeks after the end of neo-adjuvant RT±ChT</a>         | <a href="#">cancer undergoing neo-adjuvant RT±ChT followed by surgery<sup>a</sup></a> | <a href="#">report<br/>Radiology report<br/>Radiation Oncology and oncology reports/discharge letters<br/>Surgical pathology report</a> | <a href="#">of oncologic and radio-oncologic treatment</a> |                        |
| <b>OUTCOME</b><br>(n=2) | <a href="#">C&amp;R</a> | <a href="#">Analysis of overall survival at 1, 3, 5 and 10 years from diagnosis</a>                                             | <a href="#">Number of patients with colorectal cancer who survive at 1, 3, 5 and 10 years from diagnosis</a>                       | <a href="#">Number of patients with colorectal cancer</a>                             | <a href="#">Access to regional Office of Population Registry Rosters for the assessment of patients vital status</a>                    | <a href="#">Assessment of overall survival</a>             | <a href="#">[7.99]</a> |
|                         | <a href="#">C&amp;R</a> | <a href="#">Analysis of disease-free survival at 1, 3, 5 and 10 years from the curative treatment</a>                           | <a href="#">Number of patients with colorectal cancer who are disease-free at 1, 3, 5 and 10 years from the curative treatment</a> | <a href="#">Number of patients with colorectal cancer curatively treated</a>          | <a href="#">Reports/discharge letters coming from all hospital units/department (i.e. surgery, medicine, oncology, radio-oncology)</a>  | <a href="#">Assessment of disease-free survival</a>        | <a href="#">[7.99]</a> |

**Abbreviation:**

[C&R= colon-rectum; C= colon; R= rectum; FOBT= Faecal Occult Blood Test; ACR= American College of Radiology; CT= computed tomography; MRI= magnetic resonance imaging; AJCC= American Joint Committee on Cancer; RT= radiotherapy; ChT= chemotherapy; WHO= World Health Organization; TEM= transanal endoscopic microsurgery.](#)

<sup>a</sup> [surgery excludes endoscopic resection and colostomy](#)

<sup>b</sup> [emergency: within 24 hours from the onset of symptoms;](#)

<sup>c</sup> [low rectum: 4 to 7.5 cm from the dentate line \[100\]](#)

Formatted: English (U.K.)

**REFERENCE LIST**

1. Malin JL, Schneider EC, Epstein AM, et al. Results of the National Initiative for Cancer Care Quality: how can we improve the quality of cancer care in the United States? *J Clin Oncol* 2006;**24**(4):626-34 doi: JCO.2005.03.3365 [pii]  
10.1200/JCO.2005.03.3365[published Online First: Epub Date].
2. Schneider EC, Malin JL, Kahn KL, et al. Developing a system to assess the quality of cancer care: ASCO's national initiative on cancer care quality. *J Clin Oncol* 2004;**22**(15):2985-91 doi: 10.1200/JCO.2004.09.087  
22/15/2985 [pii][published Online First: Epub Date].
3. Campbell SM, Roland MO, Buetow SA. Defining quality of care. *Soc Sci Med* 2000;**51**(11):1611-25 doi: S0277953600000575 [pii][published Online First: Epub Date].
4. Neuss MN, Desch CE, McNiff KK, et al. A process for measuring the quality of cancer care: the Quality Oncology Practice Initiative. *J Clin Oncol* 2005;**23**(25):6233-9 doi: JCO.2005.05.948 [pii]  
10.1200/JCO.2005.05.948[published Online First: Epub Date].
5. Duvalko KM, Sherar M, Sawka C. Creating a system for performance improvement in cancer care: Cancer Care Ontario's clinical governance framework. *Cancer Control* 2009;**16**(4):293-302
6. Mainz J, Hansen AM, Palshof T, et al. National quality measurement using clinical indicators: the Danish National Indicator Project. *J Surg Oncol* 2009;**99**(8):500-4 doi: 10.1002/jso.21192[published Online First: Epub Date].
7. Gagliardi AR, Simunovic M, Langer B, et al. Development of quality indicators for colorectal cancer surgery, using a 3-step modified Delphi approach. *Can J Surg* 2005;**48**(6):441-52
8. Peppercorn JM, Weeks JC, Cook EF, et al. Comparison of outcomes in cancer patients treated within and outside clinical trials: conceptual framework and structured review. *Lancet* 2004;**363**(9405):263-70 doi: S0140-6736(03)15383-4 [pii]  
10.1016/S0140-6736(03)15383-4[published Online First: Epub Date].
9. Ferlay J, Parkin DM, Steliarova-Foucher E. Estimates of cancer incidence and mortality in Europe in 2008. *Eur J Cancer* 2010;**46**(4):765-81 doi: S0959-8049(09)00926-5 [pii]  
10.1016/j.ejca.2009.12.014[published Online First: Epub Date].
10. NICER. Secondary 2012. <http://www.nicer.org>.
11. Bordoni A, Lorez M, Bouchardy C, et al. Trends in colorectal cancer survival in Switzerland. *Bulletin Suisse du Cancer* 2012;**1**/2012:51-54
12. Bouchardy C, Lutz JM, Kühni C, et al. *I tumori in Svizzera. Situazione e sviluppi dal 1983 al 2007*. Neuchâtel: Ufficio Federale di Statistica (UFS), 2011.
13. Sant M, Allemani C, Santaquilani M, et al. EURO CARE-4. Survival of cancer patients diagnosed in 1995-1999. Results and commentary. *Eur J Cancer* 2009;**45**(6):931-91 doi: S0959-8049(08)00926-X [pii]  
10.1016/j.ejca.2008.11.018[published Online First: Epub Date].
14. Desch CE, Benson AB, 3rd, Somerfield MR, et al. Colorectal cancer surveillance: 2005 update of an American Society of Clinical Oncology practice guideline. *J Clin Oncol* 2005;**23**(33):8512-9 doi: JCO.2005.04.0063 [pii]  
10.1200/JCO.2005.04.0063[published Online First: Epub Date].
15. Desch CE, McNiff KK, Schneider EC, et al. American Society of Clinical Oncology/National Comprehensive Cancer Network Quality Measures. *J Clin Oncol* 2008;**26**(21):3631-7 doi: 26/21/3631 [pii]  
10.1200/JCO.2008.16.5068[published Online First: Epub Date].
16. QOPI. Summary of the measures. Spring 2011. Secondary Summary of the measures. Spring 2011. 2011. <http://qopi.asco.org/Methodology>.

|                                                                                           |
|-------------------------------------------------------------------------------------------|
| Formatted: Top: 0.98", Header distance from edge: 0.49", Footer distance from edge: 0.49" |
| Formatted: Font: 12 pt, German (Switzerland), Do not check spelling or grammar            |
| Formatted: Font: 12 pt, Do not check spelling or grammar                                  |
| Field Code Changed                                                                        |
| Formatted: Font: 12 pt, Bold, Do not check spelling or grammar                            |
| Formatted ... [1]                                                                         |
| Formatted ... [2]                                                                         |
| Formatted ... [3]                                                                         |
| Formatted ... [4]                                                                         |
| Formatted ... [5]                                                                         |
| Formatted ... [6]                                                                         |
| Formatted ... [7]                                                                         |
| Formatted ... [8]                                                                         |
| Formatted ... [9]                                                                         |
| Formatted ... [10]                                                                        |
| Formatted ... [11]                                                                        |
| Formatted ... [12]                                                                        |
| Formatted ... [13]                                                                        |
| Formatted ... [14]                                                                        |
| Formatted ... [15]                                                                        |
| Formatted ... [16]                                                                        |
| Formatted ... [17]                                                                        |
| Formatted ... [18]                                                                        |
| Formatted ... [19]                                                                        |
| Formatted ... [20]                                                                        |
| Formatted ... [21]                                                                        |
| Formatted ... [22]                                                                        |
| Formatted ... [23]                                                                        |
| Formatted ... [24]                                                                        |
| Formatted ... [25]                                                                        |
| Formatted ... [26]                                                                        |
| Formatted ... [27]                                                                        |
| Formatted ... [28]                                                                        |
| Formatted ... [29]                                                                        |
| Formatted ... [30]                                                                        |
| Formatted ... [31]                                                                        |
| Formatted ... [32]                                                                        |
| Formatted ... [33]                                                                        |
| Formatted ... [34]                                                                        |
| Formatted ... [35]                                                                        |
| Formatted ... [36]                                                                        |
| Formatted ... [37]                                                                        |
| Formatted ... [38]                                                                        |
| Formatted ... [39]                                                                        |

- 1  
2  
3  
4  
5  
6  
7  
8  
9  
10  
11  
12  
13  
14  
15  
16  
17  
18  
19  
20  
21  
22  
23  
24  
25  
26  
27  
28  
29  
30  
31  
32  
33  
34  
35  
36  
37  
38  
39  
40  
41  
42  
43  
44  
45  
46  
47  
48  
49  
50  
51  
52  
53  
54  
55  
56  
57  
58  
59  
60
17. Jacobsen PB, Shibata D, Siegel EM, et al. Measuring quality of care in the treatment of colorectal cancer: the moffitt quality practice initiative. *J Oncol Pract* 2007;**3**(2):60-5 doi: 10.1200/JOP.0722002[published Online First: Epub Date]. Formatted ... [40]
  18. Malafa MP, Corman MM, Shibata D, et al. The Florida Initiative for Quality Cancer Care: a regional project to measure and improve cancer care. *Cancer Control* 2009;**16**(4):318-27 Formatted ... [41]
  19. McGory ML, Shekelle PG, Ko CY. Development of quality indicators for patients undergoing colorectal cancer surgery. *J Natl Cancer Inst* 2006;**98**(22):1623-33 doi: 98/22/1623 [pii] 10.1093/jnci/djj438[published Online First: Epub Date]. Formatted ... [42]
  20. Siegel EM, Jacobsen PB, Malafa M, et al. Evaluating the quality of colorectal cancer care in the state of Florida: results from the Florida Initiative for Quality Cancer Care. *J Oncol Pract* 2012;**8**(4):239-45 doi: 10.1200/JOP.2011.000477 3774677 [pii][published Online First: Epub Date]. Formatted ... [43]
  21. Donabedian A. Evaluating the quality of medical care. *Milbank Q* 1966;**83**:691-729 Formatted ... [44]
  22. Fink A, Kosecoff J, Chassin M, et al. Consensus methods: characteristics and guidelines for use. *Am J Public Health* 1984;**74**(9):979-83 Formatted ... [45]
  23. Jones J, Hunter D. Consensus methods for medical and health services research. *BMJ* 1995;**311**(7001):376-80 Formatted ... [46]
  24. Brook RH. The Rand/UCLA appropriateness method. In: McCormic KA, Moore SR, Siegel RA, eds. *Clinical practice guideline development: methodology perspectives*. Rockville, Md: Agency for Health Care Policy and Research, 1994:59-70. Formatted ... [47]
  25. Krzyzanowska MK, Barbera L, Elit L, et al. Identifying population-level indicators to measure the quality of cancer care for women. *Int J Qual Health Care* 2011;**23**(5):554-64 doi: mzr043 [pii] 10.1093/intqhc/mzr043[published Online First: Epub Date]. Formatted ... [48]
  26. Blind K, Cuhls K, Grupp H. Personal attitudes in the assessment of the future of science and technology: a facton analysis approach. *Technological forecasting and social change*. 2001:131-49.
  27. Leape LL, Park RE, Kahan JP, et al. Group judgments of appropriateness: the effect of panel composition. *Qual Assur Health Care* 1992;**4**(2):151-9 Formatted ... [49]
  28. Campbell SM, Hann M, Roland MO, et al. The effect of panel membership and feedback on ratings in a two-round Delphi survey: results of a randomized controlled trial. *Med Care* 1999;**37**(9):964-8 Formatted ... [50]
  29. Coulter I, Adams A, Shekelle P. Impact of varying panel membership on ratings of appropriateness in consensus panels: a comparison of a multi- and single disciplinary panel. *Health Serv Res* 1995;**30**(4):577-91 Formatted ... [51]
  30. Wollersheim H, Hermens R, Hulscher M, et al. Clinical indicators: development and applications. *Neth J Med* 2007;**65**(1):15-22 Formatted ... [52]
  31. Mainz J. Defining and classifying clinical indicators for quality improvement. *Int J Qual Health Care* 2003;**15**(6):523-30 Formatted ... [53]
  32. Mainz J. Developing evidence-based clinical indicators: a state of the art methods primer. *Int J Qual Health Care* 2003;**15 Suppl 1**:i5-11 Formatted ... [54]
  33. Rubin HR, Pronovost P, Diette GB. From a process of care to a measure: the development and testing of a quality indicator. *Int J Qual Health Care* 2001;**13**(6):489-96 Formatted ... [55]
  34. Wilkins T, Reynolds PL. Colorectal cancer: a summary of the evidence for screening and prevention. *Am Fam Physician* 2008;**78**(12):1385-92 Formatted ... [56]
  35. Sikka V, Ornato JP. Cancer diagnosis and outcomes in Michigan EDs vs other settings. *Am J Emerg Med* 2011 doi: S0735-6757(10)00574-7 [pii] 10.1016/j.ajem.2010.11.029[published Online First: Epub Date].
  36. Levin B, Lieberman DA, McFarland B, et al. Screening and surveillance for the early detection of colorectal cancer and adenomatous polyps, 2008: a joint guideline from the American Cancer Society, the US Multi-Society Task Force on Colorectal Cancer, and the American





- world. *Ann Surg Oncol* 2011;**18**(3):691-6 doi: 10.1245/s10434-010-1326-3[[published Online First: Epub Date](#)].
54. van Gijn W, van de Velde CJ. Improving quality of cancer care through surgical audit. *Eur J Surg Oncol* 2010;**36** Suppl 1:S23-6 doi: S0748-7983(10)00202-7 [pii] 10.1016/j.ejso.2010.06.026[[published Online First: Epub Date](#)].
55. Characteristics of clinical indicators. *ORB Qual Rev Bull* 1989;**15**(11):330-9
56. Smith N, Brown G. Preoperative staging of rectal cancer. *Acta Oncol* 2008;**47**(1):20-31 doi: 783360368 [pii] 10.1080/02841860701697720[[published Online First: Epub Date](#)].
57. Schneider PM, Vallbohmer D, Ploenes Y, et al. Evaluation of quality indicators following implementation of total mesorectal excision in primarily resected rectal cancer changed future management. *Int J Colorectal Dis* 2011;**26**(7):903-9 doi: 10.1007/s00384-011-1155-2[[published Online First: Epub Date](#)].
58. ACR. Practice Guidelines and Technical Standards. Secondary Practice Guidelines and Technical Standards 2011. <http://www.acr.org/guidelines>.
59. Taylor FG, Quirke P, Heald RJ, et al. Preoperative High-resolution Magnetic Resonance Imaging Can Identify Good Prognosis Stage I, II, and III Rectal Cancer Best Managed by Surgery Alone: A Prospective, Multicenter, European Study That Recruited Consecutive Patients With Rectal Cancer. *Ann Surg* 2011 doi: 10.1097/SLA.0b013e31820b8d52[[published Online First: Epub Date](#)].
60. Beets-Tan RG, Beets GL. Local staging of rectal cancer: A review of imaging. *J Magn Reson Imaging* 2011;**33**(5):1012-9 doi: 10.1002/jmri.22475[[published Online First: Epub Date](#)].
61. Bellows CF, Jaffe B, Bacigalupo L, et al. Clinical significance of magnetic resonance imaging findings in rectal cancer. *World J Radiol* 2011;**3**(4):92-104 doi: 10.4329/wjr.v3.i4.92[[published Online First: Epub Date](#)].
62. Taylor FG, Quirke P, Heald RJ, et al. One millimetre is the safe cut-off for magnetic resonance imaging prediction of surgical margin status in rectal cancer. *Br J Surg* 2011;**98**(6):872-79 doi: 10.1002/bjs.7458[[published Online First: Epub Date](#)].
63. Lugli A, Tornillo L, Cathomas G, et al. Colon et rectum. In: Dirnhofer S, Bubendorf L, Lehr H-A, et al., eds. *Recommandations pour la qualité - SSPath*. Bâle: Société Suisse de Pathologie, 2011.
64. Washington K, Berlin J, Branton P, et al. Protocol for the examination of specimens from patients with primary carcinoma of the colon and rectum. Vers. 3.1.0.0. In: Pathologists CoA, ed. *Cancer protocols and Checklists*, 2011.
65. MacDonald AJ, McEwan H, McCabe M, et al. Age at death of patients with colorectal cancer and the effect of lead-time bias on survival in elective vs emergency surgery. *Colorectal Dis* 2011;**13**(5):519-25 doi: CDI2183 [pii] 10.1111/j.1463-1318.2009.02183.x[[published Online First: Epub Date](#)].
66. Ascanelli S, Navarra G, Tonini G, et al. Early and late outcome after surgery for colorectal cancer: elective versus emergency surgery. *Tumori* 2003;**89**(1):36-41
67. Biondo S, Marti-Rague J, Kreisler E, et al. A prospective study of outcomes of emergency and elective surgeries for complicated colonic cancer. *Am J Surg* 2005;**189**(4):377-83 doi: S0002-9610(05)00085-1 [pii] 10.1016/j.amjsurg.2005.01.009[[published Online First: Epub Date](#)].
68. Thompson GA, Cocks JR, Collopy BT, et al. Clinical indicators in colorectal surgery. *J Qual Clin Pract* 1996;**16**(1):31-5; discussion 37
69. Morris EJ, Taylor EF, Thomas JD, et al. Thirty-day postoperative mortality after colorectal cancer surgery in England. *Gut* 2011;**60**(6):806-13 doi: gut.2010.232181 [pii] 10.1136/gut.2010.232181[[published Online First: Epub Date](#)].

|                                                                               |           |
|-------------------------------------------------------------------------------|-----------|
| Formatted: Font: 12 pt, Bold, Do not check spelling or grammar                |           |
| Formatted: Font: 12 pt, Do not check spelling or grammar                      |           |
| Formatted: Font: 12 pt, Dutch (Netherlands), Do not check spelling or grammar |           |
| Formatted: Font: 12 pt, Do not check spelling or grammar                      |           |
| Formatted: Font: 12 pt, Bold, Do not check spelling or grammar                |           |
| Formatted: Font: 12 pt, Do not check spelling or grammar                      |           |
| Formatted                                                                     | ... [74]  |
| Formatted                                                                     | ... [75]  |
| Formatted                                                                     | ... [76]  |
| Formatted                                                                     | ... [77]  |
| Formatted                                                                     | ... [78]  |
| Formatted                                                                     | ... [79]  |
| Formatted                                                                     | ... [80]  |
| Formatted                                                                     | ... [81]  |
| Formatted                                                                     | ... [82]  |
| Formatted                                                                     | ... [83]  |
| Formatted                                                                     | ... [84]  |
| Formatted                                                                     | ... [85]  |
| Formatted                                                                     | ... [86]  |
| Formatted                                                                     | ... [87]  |
| Formatted                                                                     | ... [88]  |
| Formatted                                                                     | ... [89]  |
| Formatted                                                                     | ... [90]  |
| Formatted                                                                     | ... [91]  |
| Formatted                                                                     | ... [92]  |
| Formatted                                                                     | ... [93]  |
| Formatted                                                                     | ... [94]  |
| Formatted                                                                     | ... [95]  |
| Formatted                                                                     | ... [96]  |
| Formatted                                                                     | ... [97]  |
| Formatted                                                                     | ... [98]  |
| Formatted                                                                     | ... [99]  |
| Formatted                                                                     | ... [100] |
| Formatted                                                                     | ... [101] |
| Formatted                                                                     | ... [102] |
| Formatted                                                                     | ... [103] |
| Formatted                                                                     | ... [104] |
| Formatted                                                                     | ... [105] |
| Formatted                                                                     | ... [106] |
| Formatted                                                                     | ... [107] |
| Formatted                                                                     | ... [108] |
| Formatted                                                                     | ... [109] |
| Formatted                                                                     | ... [110] |

1  
2  
3  
4  
5  
6  
7  
8  
9  
10  
11  
12  
13  
14  
15  
16  
17  
18  
19  
20  
21  
22  
23  
24  
25  
26  
27  
28  
29  
30  
31  
32  
33  
34  
35  
36  
37  
38  
39  
40  
41  
42  
43  
44  
45  
46  
47  
48  
49  
50  
51  
52  
53  
54  
55  
56  
57  
58  
59  
60

70. McArdle CS, McKee RF, Finlay IG, et al. Improvement in survival following surgery for colorectal cancer. *Br J Surg* 2005;**92**(8):1008-13 doi: 10.1002/bjs.4874[published Online First: Epub Date].

71. Rutten HJ, den Dulk M, Lemmens VE, et al. Controversies of total mesorectal excision for rectal cancer in elderly patients. *Lancet Oncol* 2008;**9**(5):494-501 doi: S1470-2045(08)70129-3 [pii] 10.1016/S1470-2045(08)70129-3[published Online First: Epub Date].

72. Rogers SO, Jr., Ayanian JZ, Ko CY, et al. Surgeons' volume of colorectal cancer procedures and collaborative decision-making about adjuvant therapies. *Ann Surg* 2009;**250**(6):895-900 doi: 10.1097/SLA.0b013e3181afe0c6[published Online First: Epub Date].

73. Kurtz JE, Heitz D, Serra S, et al. Adjuvant chemotherapy in elderly patients with colorectal cancer. A retrospective analysis of the implementation of tumor board recommendations in a single institution. *Crit Rev Oncol Hematol* 2010;**74**(3):211-7 doi: S1040-8428(09)00120-6 [pii] 10.1016/j.critrevonc.2009.05.003[published Online First: Epub Date].

74. Jarry J, Faucheron JL, Moreno W, et al. Delayed colo-anal anastomosis is an alternative to prophylactic diverting stoma after total mesorectal excision for middle and low rectal carcinomas. *Eur J Surg Oncol* 2010;**37**(2):127-33 doi: S0748-7983(10)00607-4 [pii] 10.1016/j.ejso.2010.12.008[published Online First: Epub Date].

75. Junginger T, Gonner U, Trinh TT, et al. Permanent stoma after low anterior resection for rectal cancer. *Dis Colon Rectum* 2010;**53**(12):1632-9 doi: 10.1007/DCR.0b013e3181ed0aae 00003453-201012000-00007 [pii][published Online First: Epub Date].

76. Neuman HB, Patil S, Fuzesi S, et al. Impact of a Temporary Stoma on the Quality of Life of Rectal Cancer Patients Undergoing Treatment. *Ann Surg Oncol* 2010 doi: 10.1245/s10434-010-1446-9[published Online First: Epub Date].

77. Ramirez JM, Aguilera V, Valencia J, et al. Transanal endoscopic microsurgery for rectal cancer. Long-term oncologic results. *Int J Colorectal Dis* 2011 doi: 10.1007/s00384-011-1132-9[published Online First: Epub Date].

78. Lezoche G, Guerrieri M, Baldarelli M, et al. Transanal endoscopic microsurgery for 135 patients with small nonadvanced low rectal cancer (T1-T2, n0): short- and long-term results. *Surg Endosc* 2010 doi: 10.1007/s00464-010-1347-9[published Online First: Epub Date].

79. Doornebosch PG, Tollenaar RA, De Graaf EJ. Is the increasing role of Transanal Endoscopic Microsurgery in curation for T1 rectal cancer justified? A systematic review. *Acta Oncol* 2009;**48**(3):343-53 doi: 904089695 [pii] 10.1080/02841860802342408[published Online First: Epub Date].

80. Elferink MA, Siesling S, Lemmens VE, et al. Variation in Lymph Node Evaluation in Rectal Cancer: A Dutch Nationwide Population-Based Study. *Ann Surg Oncol* 2010 doi: 10.1245/s10434-010-1269-8[published Online First: Epub Date].

81. Elferink MA, Siesling S, Visser O, et al. Large variation between hospitals and pathology laboratories in lymph node evaluation in colon cancer and its impact on survival, a nationwide population-based study in the Netherlands. *Ann Oncol* 2011;**22**(1):110-7 doi: mdq312 [pii] 10.1093/annonc/mdq312[published Online First: Epub Date].

82. Kelder W, Inberg B, Schaapveld M, et al. Impact of the number of histologically examined lymph nodes on prognosis in colon cancer: a population-based study in the Netherlands. *Dis Colon Rectum* 2009;**52**(2):260-7 doi: 10.1007/DCR.0b013e3181979164 00003453-200902000-00013 [pii][published Online First: Epub Date].

83. Vather R, Sammour T, Kahokehr A, et al. Lymph node evaluation and long-term survival in Stage II and Stage III colon cancer: a national study. *Ann Surg Oncol* 2009;**16**(3):585-93 doi: 10.1245/s10434-008-0265-8[published Online First: Epub Date].

|                                                                               |
|-------------------------------------------------------------------------------|
| Formatted: Font: 12 pt, Bold, Do not check spelling or grammar                |
| Formatted: Font: 12 pt, Do not check spelling or grammar                      |
| Formatted: Font: 12 pt, Danish, Do not check spelling or grammar              |
| Formatted: Font: 12 pt, Do not check spelling or grammar                      |
| Formatted: Font: 12 pt, Bold, Do not check spelling or grammar                |
| Formatted: Font: 12 pt, Do not check spelling or grammar                      |
| Formatted: Font: 12 pt, French (France), Do not check spelling or grammar     |
| Formatted: Font: 12 pt, Do not check spelling or grammar                      |
| Formatted: Font: 12 pt, Bold, Do not check spelling or grammar                |
| Formatted: Font: 12 pt, Do not check spelling or grammar                      |
| Formatted: Font: 12 pt, Dutch (Netherlands), Do not check spelling or grammar |
| Formatted ... [111]                                                           |
| Formatted ... [112]                                                           |
| Formatted ... [113]                                                           |
| Formatted ... [114]                                                           |
| Formatted ... [115]                                                           |
| Formatted ... [116]                                                           |
| Formatted ... [117]                                                           |
| Formatted ... [118]                                                           |
| Formatted ... [119]                                                           |
| Formatted ... [120]                                                           |
| Formatted ... [121]                                                           |
| Formatted ... [122]                                                           |
| Formatted ... [123]                                                           |
| Formatted ... [124]                                                           |
| Formatted ... [125]                                                           |
| Formatted ... [126]                                                           |
| Formatted ... [127]                                                           |
| Formatted ... [128]                                                           |
| Formatted ... [129]                                                           |
| Formatted ... [130]                                                           |
| Formatted ... [131]                                                           |
| Formatted ... [132]                                                           |
| Formatted ... [133]                                                           |
| Formatted ... [134]                                                           |
| Formatted ... [135]                                                           |
| Formatted ... [136]                                                           |
| Formatted ... [137]                                                           |
| Formatted ... [138]                                                           |
| Formatted ... [139]                                                           |

|                                                                                                                                                                                                                                                                                                                                                                   |                                                                  |
|-------------------------------------------------------------------------------------------------------------------------------------------------------------------------------------------------------------------------------------------------------------------------------------------------------------------------------------------------------------------|------------------------------------------------------------------|
| 84. Lindebjerg J, Spindler KL, Ploen J, et al. The prognostic value of lymph node metastases and tumor regression grade in rectal cancer patients treated with long-course preoperative chemoradiotherapy. <i>Colorectal Dis</i> 2009; <b>11</b> (3):264-9 doi: CD11599 [pii] 10.1111/j.1463-1318.2008.01599.x[published Online First: Epub Date].                | Formatted: Font: 12 pt, Danish, Do not check spelling or grammar |
| 85. Choi HK, Law WL, Poon JT. The optimal number of lymph nodes examined in stage II colorectal cancer and its impact of on outcomes. <i>BMC Cancer</i> 2010; <b>10</b> :267 doi: 1471-2407-10-267 [pii] 10.1186/1471-2407-10-267[published Online First: Epub Date].                                                                                             | Formatted: Font: 12 pt, Do not check spelling or grammar         |
| 86. Nelson H, Petrelli N, Carlin A, et al. Guidelines 2000 for colon and rectal cancer surgery. <i>J Natl Cancer Inst</i> 2001; <b>93</b> (8):583-96                                                                                                                                                                                                              | Formatted: Font: 12 pt, Bold, Do not check spelling or grammar   |
| 87. Smith AJ, Driman DK, Spithoff K, et al. Guideline for optimization of colorectal cancer surgery and pathology. <i>J Surg Oncol</i> 2010; <b>101</b> (1):5-12 doi: 10.1002/jso.21395[published Online First: Epub Date].                                                                                                                                       | Formatted ... [140]                                              |
| 88. Andre T, Boni C, Navarro M, et al. Improved overall survival with oxaliplatin, fluorouracil, and leucovorin as adjuvant treatment in stage II or III colon cancer in the MOSAIC trial. <i>J Clin Oncol</i> 2009; <b>27</b> (19):3109-16 doi: JCO.2008.20.6771 [pii] 10.1200/JCO.2008.20.6771[published Online First: Epub Date].                              | Formatted ... [141]                                              |
| 89. Twelves C, Wong A, Nowacki MP, et al. Capecitabine as adjuvant treatment for stage III colon cancer. <i>N Engl J Med</i> 2005; <b>352</b> (26):2696-704 doi: 352/26/2696 [pii] 10.1056/NEJMoa043116[published Online First: Epub Date].                                                                                                                       | Formatted ... [142]                                              |
| 90. Van Cutsem E, Labianca R, Bodoky G, et al. Randomized phase III trial comparing biweekly infusional fluorouracil/leucovorin alone or with irinotecan in the adjuvant treatment of stage III colon cancer: PETACC-3. <i>J Clin Oncol</i> 2009; <b>27</b> (19):3117-25 doi: JCO.2008.21.6663 [pii] 10.1200/JCO.2008.21.6663[published Online First: Epub Date]. | Formatted ... [143]                                              |
| 91. Sobrero A, Lower GI. In: ESMO, ed. <i>ESMO Highlights 2010, 2010</i> .                                                                                                                                                                                                                                                                                        | Formatted ... [144]                                              |
| 92. Des Guetz G, Nicolas P, Perret GY, et al. Does delaying adjuvant chemotherapy after curative surgery for colorectal cancer impair survival? A meta-analysis. <i>Eur J Cancer</i> 2010; <b>46</b> (6):1049-55 doi: S0959-8049(10)00039-0 [pii] 10.1016/j.ejca.2010.01.020[published Online First: Epub Date].                                                  | Formatted ... [145]                                              |
| 93. Dienstmann R, Vilar E, Taberero J. Molecular predictors of response to chemotherapy in colorectal cancer. <i>Cancer J</i> 2011; <b>17</b> (2):114-26 doi: 10.1097/PPO.0b013e318212f844 00130404-201103000-00007 [pii][published Online First: Epub Date].                                                                                                     | Formatted ... [146]                                              |
| 94. Van Cutsem E, Kohne CH, Hitre E, et al. Cetuximab and chemotherapy as initial treatment for metastatic colorectal cancer. <i>N Engl J Med</i> 2009; <b>360</b> (14):1408-17 doi: 360/14/1408 [pii] 10.1056/NEJMoa0805019[published Online First: Epub Date].                                                                                                  | Formatted ... [147]                                              |
| 95. Hutchins G, Southward K, Handley K, et al. Value of mismatch repair, KRAS, and BRAF mutations in predicting recurrence and benefits from chemotherapy in colorectal cancer. <i>J Clin Oncol</i> 2011; <b>29</b> (10):1261-70 doi: JCO.2010.30.1366 [pii] 10.1200/JCO.2010.30.1366[published Online First: Epub Date].                                         | Formatted ... [148]                                              |
| 96. Van Cutsem E, Nordlinger B, Cervantes A. Advanced colorectal cancer: ESMO Clinical Practice Guidelines for treatment. <i>Ann Oncol</i> 2010; <b>21</b> (suppl. 5):v93-v97                                                                                                                                                                                     | Formatted ... [149]                                              |
| 97. Glimelius B, Holm T, Blomqvist L. Chemotherapy in addition to preoperative radiotherapy in locally advanced rectal cancer - a systematic overview. <i>Rev Recent Clin Trials</i> 2008; <b>3</b> (3):204-11                                                                                                                                                    | Formatted ... [150]                                              |
| 98. Glimelius B, Pahlman L, Cervantes A. Rectal cancer: ESMO Clinical Practice Guidelines for diagnosis, treatment and follow-up. <i>Ann Oncol</i> 2010; <b>21</b> (suppl. 5):v82-v86                                                                                                                                                                             | Formatted ... [151]                                              |
| 99. Landheer ML, Therasse P, van de Velde CJ. The importance of quality assurance in surgical oncology in the treatment of colorectal cancer. <i>Surg Oncol Clin N Am</i> 2001; <b>10</b> (4):885-914. x                                                                                                                                                          | Formatted ... [152]                                              |
| 100. Wagner G. <i>Tumor-Lokalisationsschlüssel. International Classification of Diseases for Oncology ICD-O, 2. Topographischer Teil</i> . 5th ed. Berlin: Springer-Verlag, 1993.                                                                                                                                                                                 | Formatted ... [153]                                              |
|                                                                                                                                                                                                                                                                                                                                                                   | Formatted ... [154]                                              |
|                                                                                                                                                                                                                                                                                                                                                                   | Formatted ... [155]                                              |
|                                                                                                                                                                                                                                                                                                                                                                   | Formatted ... [156]                                              |
|                                                                                                                                                                                                                                                                                                                                                                   | Formatted ... [157]                                              |
|                                                                                                                                                                                                                                                                                                                                                                   | Formatted ... [158]                                              |
|                                                                                                                                                                                                                                                                                                                                                                   | Formatted ... [159]                                              |
|                                                                                                                                                                                                                                                                                                                                                                   | Formatted ... [160]                                              |
|                                                                                                                                                                                                                                                                                                                                                                   | Formatted ... [161]                                              |
|                                                                                                                                                                                                                                                                                                                                                                   | Formatted ... [162]                                              |
|                                                                                                                                                                                                                                                                                                                                                                   | Formatted ... [163]                                              |
|                                                                                                                                                                                                                                                                                                                                                                   | Formatted ... [164]                                              |
|                                                                                                                                                                                                                                                                                                                                                                   | Formatted ... [165]                                              |
|                                                                                                                                                                                                                                                                                                                                                                   | Formatted ... [166]                                              |
|                                                                                                                                                                                                                                                                                                                                                                   | Formatted ... [167]                                              |
|                                                                                                                                                                                                                                                                                                                                                                   | Formatted ... [168]                                              |
|                                                                                                                                                                                                                                                                                                                                                                   | Formatted ... [169]                                              |
|                                                                                                                                                                                                                                                                                                                                                                   | Formatted ... [170]                                              |
|                                                                                                                                                                                                                                                                                                                                                                   | Formatted ... [171]                                              |
|                                                                                                                                                                                                                                                                                                                                                                   | Formatted ... [172]                                              |
|                                                                                                                                                                                                                                                                                                                                                                   | Formatted ... [173]                                              |
|                                                                                                                                                                                                                                                                                                                                                                   | Formatted ... [174]                                              |
|                                                                                                                                                                                                                                                                                                                                                                   | Formatted ... [175]                                              |
|                                                                                                                                                                                                                                                                                                                                                                   | Formatted ... [176]                                              |
|                                                                                                                                                                                                                                                                                                                                                                   | Formatted ... [177]                                              |
|                                                                                                                                                                                                                                                                                                                                                                   | Formatted ... [178]                                              |
|                                                                                                                                                                                                                                                                                                                                                                   | Formatted ... [179]                                              |
|                                                                                                                                                                                                                                                                                                                                                                   | Formatted ... [180]                                              |
|                                                                                                                                                                                                                                                                                                                                                                   | Formatted: Indent: Left: 0", Hanging: 0.5"                       |



1  
2  
3  
4  
5  
6  
7  
8  
9  
10  
11  
12  
13  
14  
15  
16  
17  
18  
19  
20  
21  
22  
23  
24  
25  
26  
27  
28  
29  
30  
31  
32  
33  
34  
35  
36  
37  
38  
39  
40  
41  
42  
43  
44  
45  
46  
47  
48  
49  
50  
51  
52  
53  
54  
55  
56  
57  
58  
59  
60

|

For peer review only

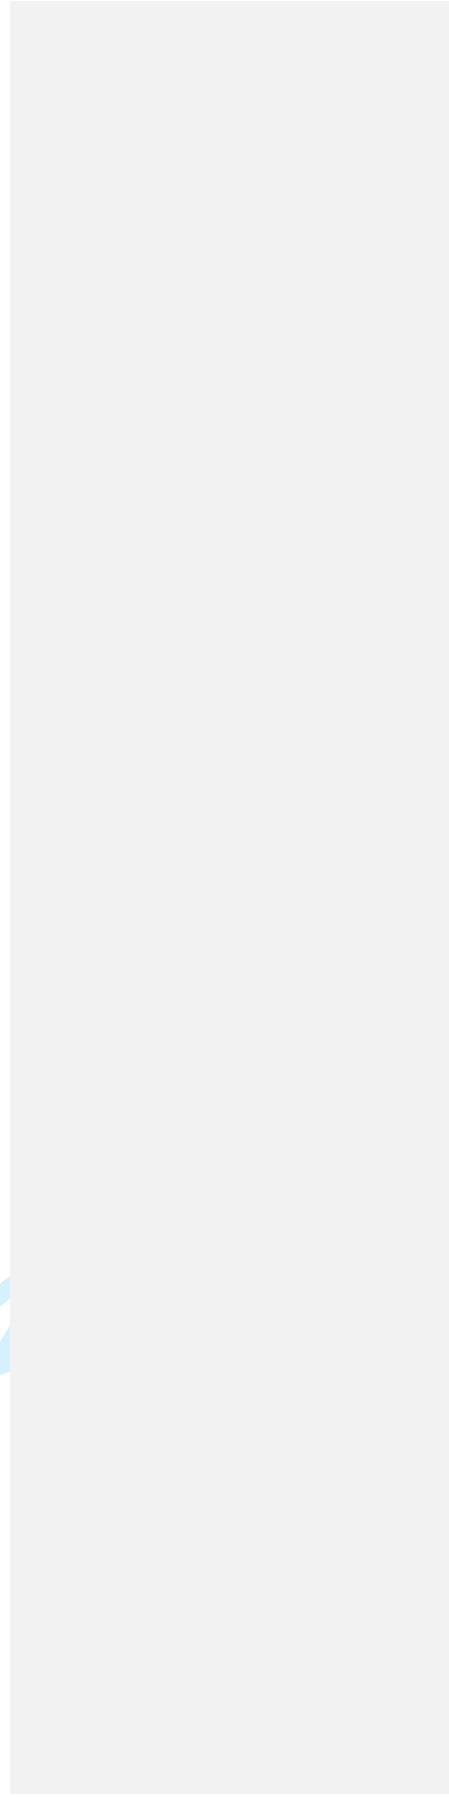

7

1 4/30/2013 3:52:00 PM

2  
3  
mhar

4 4/30/2013 3:52:00 PM

5  
6

7 4/30/2013 2:46:00 PM

8  
9

10 4/30/2013 2:46:00 PM

11  
12

13 4/30/2013 2:46:00 PM

14  
15

16 4/30/2013 2:46:00 PM

17  
18

19 4/30/2013 2:46:00 PM

20  
21

22 4/30/2013 2:46:00 PM

23  
24

25  
26

27  
28

29  
30

31  
32

33  
34

35  
36

37  
38

39  
40

41  
42

43  
44

45  
46

47  
48

49  
50

51  
52

53  
54

55  
56

57  
58

59  
60

For peer review only

4/30/2013 2:46:00 PM

- 1
- 2
- 3
- 4
- 5
- 6
- 7
- 8
- 9
- 10
- 11
- 12
- 13
- 14
- 15
- 16
- 17
- 18
- 19
- 20
- 21
- 22
- 23
- 24
- 25
- 26
- 27
- 28
- 29
- 30
- 31
- 32
- 33
- 34
- 35
- 36
- 37
- 38
- 39
- 40
- 41
- 42
- 43
- 44
- 45
- 46
- 47
- 48
- 49
- 50
- 51
- 52
- 53
- 54
- 55
- 56
- 57
- 58
- 59
- 60

4/30/2013 2:46:00 PM

For peer review only

mmar

1 4/30/2013 3:52:00 PM

2

3

4 4/30/2013 3:52:00 PM

5

6

7 4/30/2013 3:52:00 PM

8

9

10 4/30/2013 2:46:00 PM

11

12 4/30/2013 2:46:00 PM

13

14 4/30/2013 2:46:00 PM

15

16 4/30/2013 2:46:00 PM

17

18 4/30/2013 2:46:00 PM

19

20

21 4/30/2013 2:46:00 PM

22

23

24

25

26

27

28

29

30

31

32

33

34

35

36

37

38

39

40

41

42

43

44

45

46

47

48

49

50

51

52

53

54

55

56

57

58

59

60

For peer review only

4/30/2013 2:46:00 PM

- 1
- 2
- 3
- 4
- 5
- 6
- 7
- 8
- 9
- 10
- 11
- 12
- 13
- 14
- 15
- 16
- 17
- 18
- 19
- 20
- 21
- 22
- 23
- 24
- 25
- 26
- 27
- 28
- 29
- 30
- 31
- 32
- 33
- 34
- 35
- 36
- 37
- 38
- 39
- 40
- 41
- 42
- 43
- 44
- 45
- 46
- 47
- 48
- 49
- 50
- 51
- 52
- 53
- 54
- 55
- 56
- 57
- 58
- 59
- 60

4/30/2013 2:46:00 PM

For peer review only

|    |                      |
|----|----------------------|
| 1  | 4/30/2013 2:46:00 PM |
| 2  |                      |
| 3  |                      |
| 4  | 4/30/2013 2:46:00 PM |
| 5  |                      |
| 6  |                      |
| 7  | 4/30/2013 2:46:00 PM |
| 8  |                      |
| 9  |                      |
| 10 | 4/30/2013 3:52:00 PM |
| 11 |                      |
| 12 |                      |
| 13 | 4/30/2013 3:52:00 PM |
| 14 |                      |
| 15 | 4/30/2013 2:46:00 PM |
| 16 |                      |
| 17 |                      |
| 18 | 4/30/2013 3:52:00 PM |
| 19 |                      |
| 20 |                      |
| 21 | 4/30/2013 2:46:00 PM |
| 22 |                      |

For peer review only

|    |  |
|----|--|
| 23 |  |
| 24 |  |
| 25 |  |
| 26 |  |
| 27 |  |
| 28 |  |
| 29 |  |
| 30 |  |
| 31 |  |
| 32 |  |
| 33 |  |
| 34 |  |
| 35 |  |
| 36 |  |
| 37 |  |
| 38 |  |
| 39 |  |
| 40 |  |
| 41 |  |
| 42 |  |
| 43 |  |
| 44 |  |
| 45 |  |
| 46 |  |
| 47 |  |
| 48 |  |
| 49 |  |
| 50 |  |
| 51 |  |
| 52 |  |
| 53 |  |
| 54 |  |
| 55 |  |
| 56 |  |
| 57 |  |
| 58 |  |
| 59 |  |
| 60 |  |

4/30/2013 2:46:00 PM

- 1
- 2
- 3
- 4
- 5
- 6
- 7
- 8
- 9
- 10
- 11
- 12
- 13
- 14
- 15
- 16
- 17
- 18
- 19
- 20
- 21
- 22
- 23
- 24
- 25
- 26
- 27
- 28
- 29
- 30
- 31
- 32
- 33
- 34
- 35
- 36
- 37
- 38
- 39
- 40
- 41
- 42
- 43
- 44
- 45
- 46
- 47
- 48
- 49
- 50
- 51
- 52
- 53
- 54
- 55
- 56
- 57
- 58
- 59
- 60

4/30/2013 2:46:00 PM

For peer review only

1 4/30/2013 3:52:00 PM

2

3

4 4/30/2013 3:52:00 PM

5

6

7 4/30/2013 2:46:00 PM

8

9

10 4/30/2013 2:46:00 PM

11

12 4/30/2013 2:46:00 PM

13

14

15 4/30/2013 3:52:00 PM

16

17

18 4/30/2013 2:46:00 PM

19

20

21 4/30/2013 3:52:00 PM

22

23

24

25

26

27

28

29

30

31

32

33

34

35

36

37

38

39

40

41

42

43

44

45

46

47

48

49

50

51

52

53

54

55

56

57

58

59

60

For peer review only



4/30/2013 2:46:00 PM

- 1
- 2
- 3
- 4
- 5
- 6
- 7
- 8
- 9
- 10
- 11
- 12
- 13
- 14
- 15
- 16
- 17
- 18
- 19
- 20
- 21
- 22
- 23
- 24
- 25
- 26
- 27
- 28
- 29
- 30
- 31
- 32
- 33
- 34
- 35
- 36
- 37
- 38
- 39
- 40
- 41
- 42
- 43
- 44
- 45
- 46
- 47
- 48
- 49
- 50
- 51
- 52
- 53
- 54
- 55
- 56
- 57
- 58
- 59
- 60

4/30/2013 2:46:00 PM

4/30/2013 2:46:00 PM

4/30/2013 3:52:00 PM

4/30/2013 2:46:00 PM

4/30/2013 2:46:00 PM

4/30/2013 2:46:00 PM

4/30/2013 2:46:00 PM

For peer review only

|    |                      |
|----|----------------------|
| 1  | 4/30/2013 2:46:00 PM |
| 2  |                      |
| 3  |                      |
| 4  | 4/30/2013 2:46:00 PM |
| 5  |                      |
| 6  |                      |
| 7  | 4/30/2013 2:46:00 PM |
| 8  |                      |
| 9  |                      |
| 10 | 4/30/2013 3:52:00 PM |
| 11 |                      |
| 12 |                      |
| 13 | 4/30/2013 2:46:00 PM |
| 14 |                      |
| 15 | 4/30/2013 2:46:00 PM |
| 16 |                      |
| 17 |                      |
| 18 | 4/30/2013 2:46:00 PM |
| 19 |                      |
| 20 |                      |
| 21 | 4/30/2013 2:46:00 PM |
| 22 |                      |
| 23 |                      |
| 24 |                      |
| 25 |                      |
| 26 |                      |
| 27 |                      |
| 28 |                      |
| 29 |                      |
| 30 |                      |
| 31 |                      |
| 32 |                      |
| 33 |                      |
| 34 |                      |
| 35 |                      |
| 36 |                      |
| 37 |                      |
| 38 |                      |
| 39 |                      |
| 40 |                      |
| 41 |                      |
| 42 |                      |
| 43 |                      |
| 44 |                      |
| 45 |                      |
| 46 |                      |
| 47 |                      |
| 48 |                      |
| 49 |                      |
| 50 |                      |
| 51 |                      |
| 52 |                      |
| 53 |                      |
| 54 |                      |
| 55 |                      |
| 56 |                      |
| 57 |                      |
| 58 |                      |
| 59 |                      |
| 60 |                      |

For peer review only

4/30/2013 2:46:00 PM

- 1
- 2
- 3
- 4
- 5
- 6
- 7
- 8
- 9
- 10
- 11
- 12
- 13
- 14
- 15
- 16
- 17
- 18
- 19
- 20
- 21
- 22
- 23
- 24
- 25
- 26
- 27
- 28
- 29
- 30
- 31
- 32
- 33
- 34
- 35
- 36
- 37
- 38
- 39
- 40
- 41
- 42
- 43
- 44
- 45
- 46
- 47
- 48
- 49
- 50
- 51
- 52
- 53
- 54
- 55
- 56
- 57
- 58
- 59
- 60

4/30/2013 3:52:00 PM

4/30/2013 2:46:00 PM

4/30/2013 2:46:00 PM

4/30/2013 2:46:00 PM

4/30/2013 3:52:00 PM

4/30/2013 2:46:00 PM

4/30/2013 2:46:00 PM

For peer review only

1 4/30/2013 2:46:00 PM

2

3

4 4/30/2013 3:52:00 PM

5  
mar

6

7 4/30/2013 3:52:00 PM

8  
grammar

9

10 4/30/2013 3:52:00 PM

11  
ma

12

13 4/30/2013 2:46:00 PM

14

15 4/30/2013 3:52:00 PM

16  
mar

17

18 4/30/2013 3:52:00 PM

19  
or grammar

20

21 4/30/2013 3:52:00 PM

22

23

24

25

26

27

28

29

30

31

32

33

34

35

36

37

38

39

40

41

42

43

44

45

46

47

48

49

50

51

52

53

54

55

56

57

58

59

60

For peer review only

1  
2  
3  
4  
5  
6  
7  
8  
9  
10  
11  
12  
13  
14  
15  
16  
17  
18  
19  
20  
21  
22  
23  
24  
25  
26  
27  
28  
29  
30  
31  
32  
33  
34  
35  
36  
37  
38  
39  
40  
41  
42  
43  
44  
45  
46  
47  
48  
49  
50  
51  
52  
53  
54  
55  
56  
57  
58  
59  
60

For peer review only

Figure 1. Process used to select quality indicators for colorectal cancer care

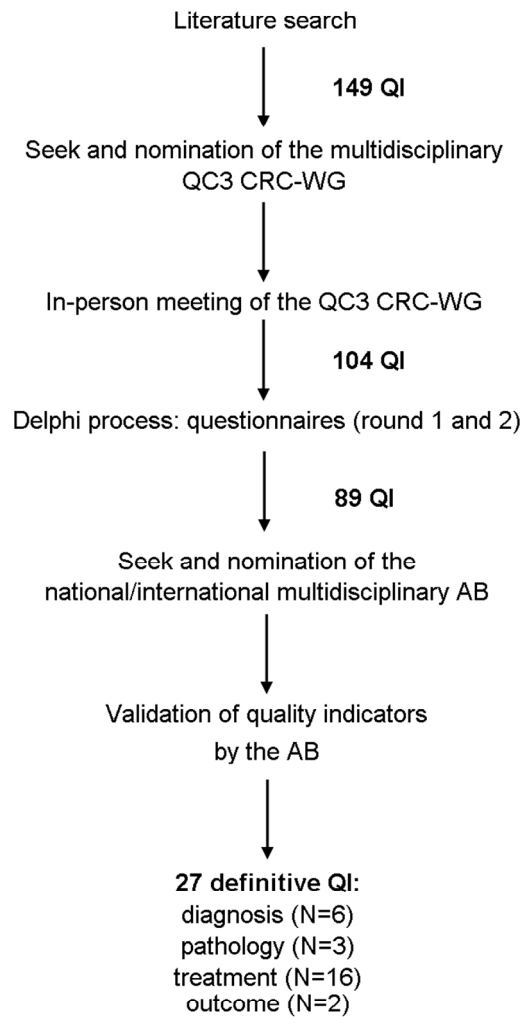

QI= Quality Indicators; QC3 CRC-WG: QC3 Colorectal Cancer Working Group; AB: Advisory Board

102x131mm (300 x 300 DPI)
